# Supplementary material for: Visible light mediated synthesis of 4-aryl-1,2-dihydronaphthalene derivatives via single-electron oxidation or MHAT from methylenecyclopropanes
Source: Royal Society of Chemistry journal article supplement (doi:10.1039/d0qo00853b), 2020-11-10

Supporting Information

**Visible light mediated synthesis of 4-phenyl-1,2-dihydronaphthalene derivatives via single-electron oxidation or MHAT from methylenecyclopropanes**

*Jiixin Liu,<sup>a</sup> Yin Wei,<sup>a</sup> Min Shi<sup>a,b\*</sup>*

*<sup>a</sup> State Key Laboratory of Organometallic Chemistry, Center for Excellence in Molecular Synthesis, Shanghai Institute of Organic Chemistry, University of Chinese Academy of Science, Chinese Academy of Sciences, 345 Lingling Road, Shanghai 200032 China. [mshi@mail.sioc.ac.cn](mailto:mshi@mail.sioc.ac.cn), Fax 86-21-64166128*

*<sup>b</sup> Shenzhen Grubbs Institute, Southern University of Science and Technology, Shenzhen, Guangdong 518000, China.*

# Contents

|                                                                    |    |
|--------------------------------------------------------------------|----|
| 1. General remarks .....                                           | 2  |
| 2. Optimization of reaction conditions .....                       | 3  |
| 3. General procedure for the preparation of 1 .....                | 5  |
| 4. General procedure for the preparation of 2 & 3 .....            | 7  |
| 5. Luminescence quenching experiments (Stern-Volmer studies) ..... | 8  |
| 6. Spectroscopy of compounds 2 .....                               | 9  |
| 7. Spectroscopy of compounds 3 .....                               | 14 |
| 8. Reference .....                                                 | 19 |
| 9. NMR Spectroscopy .....                                          | 20 |

**General remarks**

$^1\text{H}$ ,  $^{13}\text{C}$  and  $^{19}\text{F}$  NMR spectra were recorded at 400 MHz, respectively. HRMS spectra were recorded by EI, ESI method. Infrared spectra were recorded on a Perkin-Elmer PE-983 spectrometer with absorption in  $\text{cm}^{-1}$ . Mass spectra were recorded by EI, ESI, and HRMS was measured on an Agilent Technologies 6224 TOF LC/MS instrument and a Waters Micromass GCT Permier. Melting points were determined on a digital melting point apparatus and temperatures were uncorrected. X-ray structure was determined on a Bruker Smart-1000 X-ray Diffraction meter. The employed solvents were dried up by standard methods when necessary. Commercially obtained reagents were used without further purification. All reactions were monitored by TLC with silica gel coated plates (Huanghai GF254). Flash column chromatography was performed by using 300-400 mesh silica gel eluting with ethyl acetate and petroleum ether at increased pressure.

## 1. Optimization of reaction conditions

**Table S1.** Optimization of reaction conditions using **1a** as a template substrate to furnish **2a**.

Photocatalyst  
F<sup>-</sup> source  
cocatalyst  
blue LEDs, solvent

**1a** → **2a**

| entry           | photocatalyst                                                  | F <sup>-</sup> source | cocatalyst                            | solvent            | yield (%) |
|-----------------|----------------------------------------------------------------|-----------------------|---------------------------------------|--------------------|-----------|
| 1               | cat I                                                          | Et <sub>3</sub> N·3HF | 4,4'-dinitrodiphenyl disulfide        | CH <sub>3</sub> CN | 21        |
| 2               | cat I                                                          | Et <sub>3</sub> N·3HF | Co(dmgh) <sub>2</sub> PyCl            | CH <sub>3</sub> CN | 44        |
| 3               | cat I                                                          | CsF                   | Co(dmgh) <sub>2</sub> PyCl            | CH <sub>3</sub> CN | -         |
| 4               | cat I                                                          | TBAF                  | Co(dmgh) <sub>2</sub> PyCl            | CH <sub>3</sub> CN | -         |
| 5               | cat I                                                          | KHF <sub>2</sub>      | Co(dmgh) <sub>2</sub> PyCl            | CH <sub>3</sub> CN | -         |
| 6 <sup>b</sup>  | cat I                                                          | Et <sub>3</sub> N·3HF | Co(dmgh) <sub>2</sub> PyCl            | CH <sub>3</sub> CN | 55        |
| 7 <sup>b</sup>  | cat I                                                          | Et <sub>3</sub> N·3HF | Co(dmgh) <sub>2</sub> PyCl            | DCM                | 27        |
| 8 <sup>b</sup>  | cat I                                                          | Et <sub>3</sub> N·3HF | Co(dmgh) <sub>2</sub> PyCl            | 1,4-Dioxane        | 14        |
| 9 <sup>b</sup>  | cat I                                                          | Et <sub>3</sub> N·3HF | Co(dmgh) <sub>2</sub> PyCl            | Toluene            | trace     |
| 10 <sup>b</sup> | cat I                                                          | Et <sub>3</sub> N·3HF | Co(dmgh) <sub>2</sub> Cl <sub>2</sub> | CH <sub>3</sub> CN | -         |
| 11 <sup>b</sup> | cat I                                                          | Et <sub>3</sub> N·3HF | Co(dmgh) <sub>2</sub> (DMAP)Cl        | CH <sub>3</sub> CN | 34        |
| 12 <sup>b</sup> | cat II                                                         | Et <sub>3</sub> N·3HF | Co(dmgh) <sub>2</sub> PyCl            | CH <sub>3</sub> CN | 27        |
| 13 <sup>b</sup> | cat III                                                        | Et <sub>3</sub> N·3HF | Co(dmgh) <sub>2</sub> PyCl            | CH <sub>3</sub> CN | 8         |
| 14 <sup>b</sup> | Ir(dFCF <sub>3</sub> ppy) <sub>2</sub> (dtbbpy)PF <sub>6</sub> | Et <sub>3</sub> N·3HF | Co(dmgh) <sub>2</sub> PyCl            | CH <sub>3</sub> CN | -         |
| 15 <sup>c</sup> | cat I                                                          | Et <sub>3</sub> N·3HF | Co(dmgh) <sub>2</sub> PyCl            | CH <sub>3</sub> CN | -         |
| 16 <sup>b</sup> | cat I                                                          | Et <sub>3</sub> N·3HF | -                                     | CH <sub>3</sub> CN | trace     |
| 17 <sup>d</sup> | cat I                                                          | Et <sub>3</sub> N·3HF | Co(dmgh) <sub>2</sub> PyCl            | CH <sub>3</sub> CN | -         |

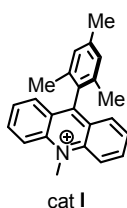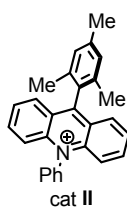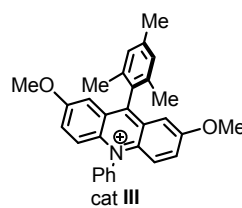

Initially, we utilized Mes-Arc-ClO<sub>4</sub><sup>-</sup> as photocatalyst and 4,4'-dinitrodiphenyl disulfide as cocatalyst to investigate the reactivity of MCP **1a** with 1.0 equiv of Et<sub>3</sub>N·3HF. The desired product **2a** was obtained in 21% yield under 12 W blue LEDs irradiation and its structure was confirmed by <sup>1</sup>H NMR, <sup>13</sup>C NMR, HRMS spectroscopic data. Then, the related reaction conditions were optimized with regard to catalyst, solvent, and the source of fluorine anion in a sequence to get the highest yield of **2a**.

To further increase the acidity of the solvent, the mixture of HFIP and CH<sub>3</sub>CN was used as the solvent. In addition, 4Å molecular sieves were added to get rid of the impact of H<sub>2</sub>O. In this case, we acquired **3a** in 76% yield unexpectedly.

## 2. General procedure for the preparation of **1**<sup>[1]</sup>

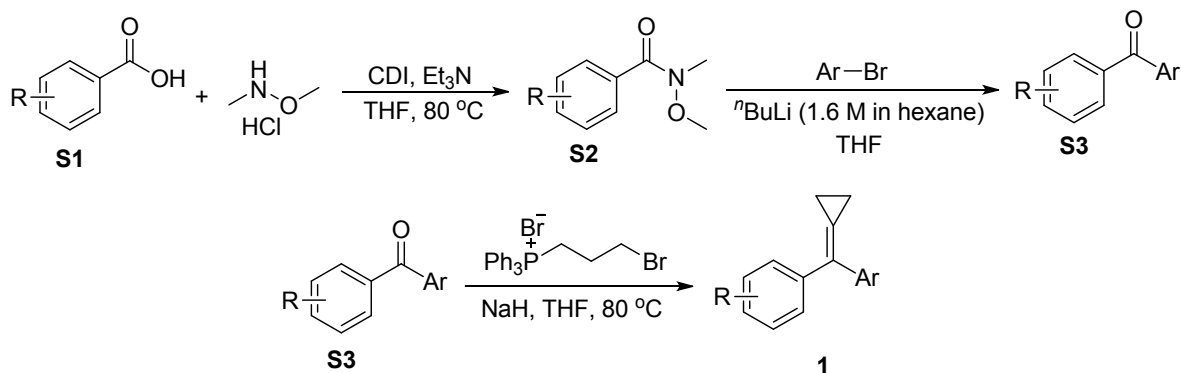

General synthetic method for **1**:

To a 250 mL round bottom flask were added anthranilic acid **S1** (1.0 equiv), 1,1'-carbonyldiimidazole (CDI) (1.0 equiv) and THF (1.0 mL/mol of anthranilic acid), and then the reaction mixture was heated to 70 °C for 0.5 hours. To another 50 mL round bottom flask were added *N, O*-dimethylhydroxylamine hydrochloride (1.0 equiv), Et<sub>3</sub>N (1.0 equiv), and the reaction mixture was stirred for 10 min. Then, the solution of *N, O*-dimethylhydroxylamine hydrochloride in THF was added into the above THF solution of **S1** and CDI in a 250 mL round bottom flask. Next, the reaction mixture was stirred at 80 °C for 3 hours. After that, the mixture was filtered and extracted with CH<sub>2</sub>Cl<sub>2</sub> for three times. The solvent was removed in vacuum and the residue was purified by a column chromatography to give the desired Weinreb amide **S2**.

To an oven dried 250 mL round bottom flask were added a solution of aryl bromide in anhydrous THF under inert atmosphere and then the reaction mixture was cooled to -78 °C. A solution of *n*-BuLi in anhydrous hexane was added to the reaction mixture for 0.5 h at -78 °C. Subsequently, a solution of Weinreb amide **S2** in anhydrous THF was added to the mixture for 0.5 h at -78 °C. The reaction was quenched by addition of 5% HCl aqueous solution, extracted with ethyl acetate for three times. The organic extracts were dried over Na<sub>2</sub>SO<sub>4</sub> and concentrated in vacuum. The product was purified by a column chromatography to give the desired benzophenones **S3**.

To an oven-dried round bottom flask was added sodium hydride (3.0 equiv) and (3-bromopropyl)triphenylphosphonium bromide (1.5 equiv), and then anhydrous THF (2.0 mL/mol of NaH) was added under inert atmosphere. The reaction mixture was stirred for 2 hours under reflux. Then, a solution of benzophenone **S3** (1.0 equiv) in THF (1.0 mL/mol) was added to the reaction mixture and the resulting mixture was stirred for another 3 hours. The reaction mixture was subsequently cooled to room temperature and filtered through a Celite and washed with petroleum

ether for three times. Next, the solvent was removed under vacuum and the residue was purified by a column chromatography to give methylenecyclopropanes **1**.

### 3. General procedure for the preparation of 2 & 3.

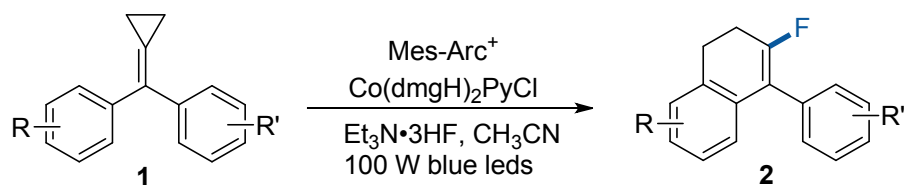

Reactions were carried out with **1** (0.2 mmol), photocatalyst (3 mol%), Co catalyst (3 mol%) in solvents (2 mL) at ambient temperature using 100 W blue light irradiation for 12 hours. The product was purified by a column chromatography to give the desired products **2**. Yields were determined by isolated product.

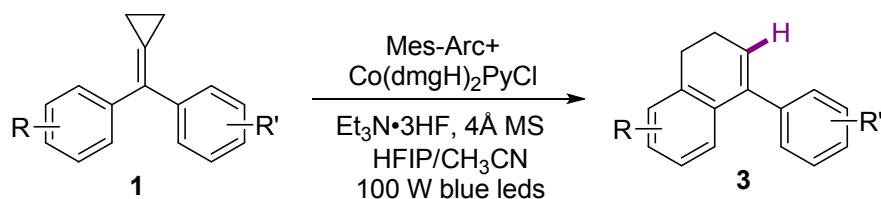

Reactions were carried out with oven-dried 4Å MS 50 mg, **1a** (0.2 mmol), photocatalyst (3 mol%), Co catalyst (3 mol%) in 2 mL solvents (HFIP/CH<sub>3</sub>CN = 4:1) at ambient temperature using 100 W blue light irradiation for 12 hours. The mixture was filtered through a Celite and washed with petroleum ether. Next, the solvent was removed under vacuum and the residue was purified by a column chromatography to give **3**. Yields were determined by isolated product.

The above reaction mixtures were stirred and irradiated with a Kelo 100 W blue LED lamp (5 cm away, with cooling fan to keep the reaction temperature no more than 30 °C) for 12 hours.

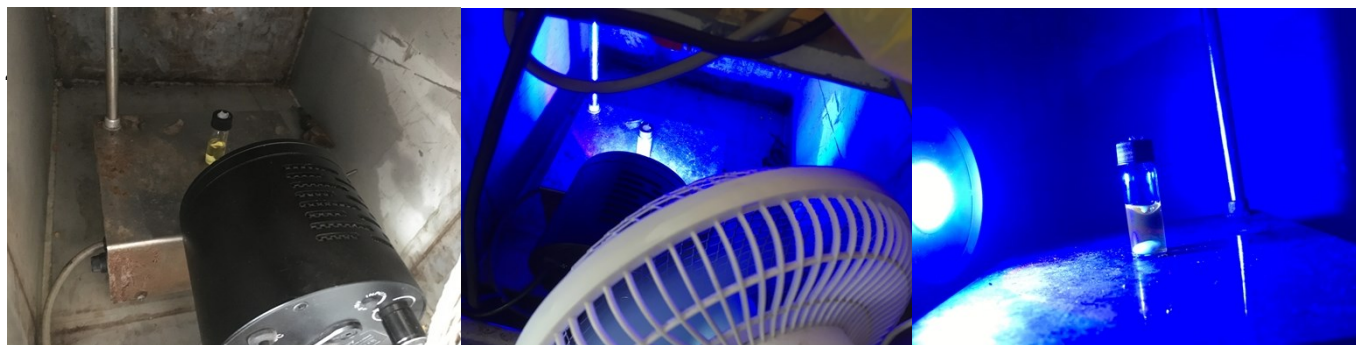



## 5. Luminescence Quenching Experiments (Stern-Volmer Studies)

Emission intensities were recorded using a Hitachi F-2700 fluorescence spectrophotometer with a 5 nm band width. Solutions of different concentration of **1a** were prepared and introduced to a 1 cm path length quartz cuvette equipped with a Teflon® septum under Ar atmosphere. In a typical experiment, to a 0.005 M solution of photocatalyst in MeCN was added the appropriate amount **1a** in screw-top quartz cuvette under Ar atmosphere and the emission of the sample was collected.

Photocatalyst was excited at 430 nm and the emission intensity was collected at 440 nm. The solutions mixtures were stirred for 30s in dark, then filtered to 1.0 cm path length quartz cuvettes, sealed with Teflon® septum.

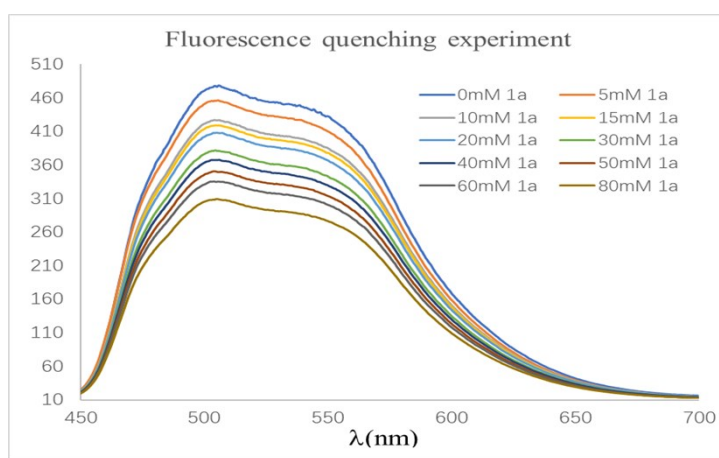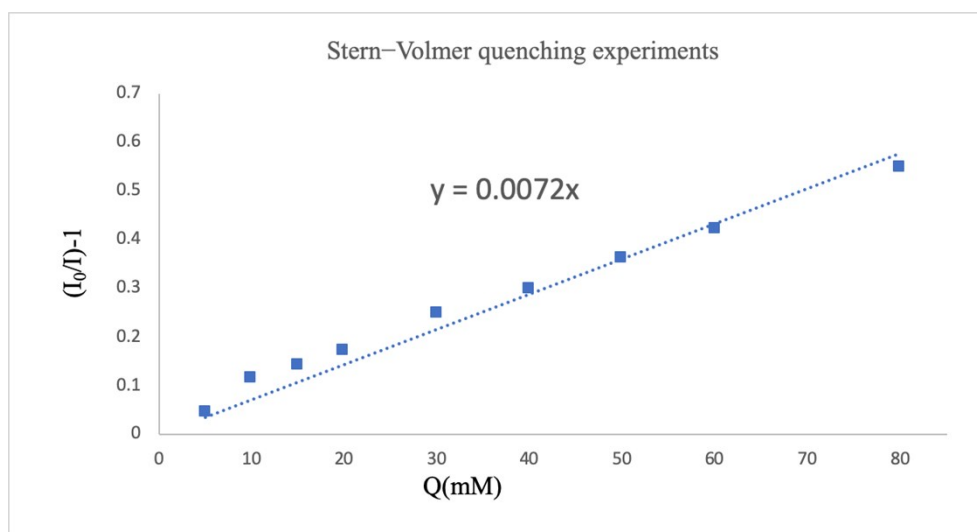

## 6. Spectroscopy of compounds 2

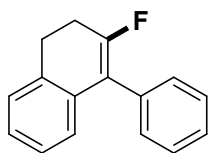

**Compound 2a:** colorless oil (24.6 mg, 55%).  $^1\text{H}$  NMR (400 MHz,  $\text{CDCl}_3$ , TMS)  $\delta$  7.42 (t,  $J = 7.6$  Hz, 2H), 7.38-7.26 (m, 3H), 7.16 (d,  $J = 7.0$  Hz, 1H), 7.14-7.03 (m, 2H), 6.81 (d,  $J = 7.5$  Hz, 1H), 3.08 (td,  $J = 8.4, 2.4$  Hz, 2H), 2.70 (td,  $J = 8.2, 5.5$  Hz, 2H).  $^{13}\text{C}$  NMR (100 MHz,  $\text{CDCl}_3$ )  $\delta$  158.0 (d,  $J = 267.3$  Hz), 135.3 (d,  $J = 5.4$  Hz), 133.7, 132.9, 130.2, 128.3, 128.2 (d,  $J = 4.7$  Hz), 127.3 (d,  $J = 15.9$  Hz), 126.5, 126.2 (d,  $J = 2.1$  Hz), 125.3 (d,  $J = 6.8$  Hz), 117.3 (d,  $J = 13.2$  Hz), 28.7, 25.2 (d,  $J = 24.4$  Hz).  $^{19}\text{F}$  NMR (376 MHz,  $\text{CDCl}_3$ )  $\delta$  -102.2. IR (neat)  $\nu$  3058, 2943, 1671, 1483, 1151, 941, 764, 753  $\text{cm}^{-1}$ . HRMS (EI) Calcd. for  $\text{C}_{16}\text{H}_{13}\text{F}$  requires  $[\text{M}]^+$ : 224.0996, Found: 224.0995.

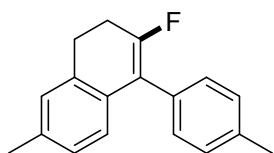

**Compound 2b:** colorless oil (26.7 mg, 53%).  $^1\text{H}$  NMR (400 MHz,  $\text{CDCl}_3$ , TMS)  $\delta$  7.24-7.17 (m, 4H), 6.98 (s, 1H), 6.87 (d,  $J = 7.2$  Hz, 1H), 6.71 (d,  $J = 7.7$  Hz, 1H), 3.03 (td,  $J = 8.0, 2.0$  Hz, 3H), 2.66 (td,  $J = 8.1, 5.6$  Hz, 3H), 2.39 (s, 3H), 2.29 (s, 3H).  $^{13}\text{C}$  NMR (100 MHz,  $\text{CDCl}_3$ )  $\delta$  157.3 (d,  $J = 265.6$  Hz), 137.0, 135.8 (d,  $J = 2.4$  Hz), 132.8, 132.6 (d,  $J = 5.4$  Hz), 130.7 (d,  $J = 1.0$  Hz), 130.0 (d,  $J = 1.8$  Hz), 129.0, 128.2, 127.0, 125.3 (d,  $J = 6.8$  Hz), 116.9 (d,  $J = 13.2$  Hz), 28.8 (d,  $J = 6.7$  Hz), 25.3 (d,  $J = 24.7$  Hz), 21.3, 21.0.  $^{19}\text{F}$  NMR (376 MHz,  $\text{CDCl}_3$ )  $\delta$  -103.8. IR (neat)  $\nu$  3024, 2921, 1668, 1512, 1359, 1114, 934, 812, 742  $\text{cm}^{-1}$ . HRMS (EI) Calcd. for  $\text{C}_{18}\text{H}_{17}\text{F}$  requires  $[\text{M}]^+$ : 252.1309, Found: 252.1307.

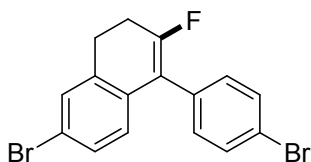

**Compound 2c:** colorless oil (30.6 mg, 40%).  $^1\text{H}$  NMR (400 MHz,  $\text{CDCl}_3$ , TMS)  $\delta$  7.59-7.52 (m, 2H), 7.30 (d,  $J = 2.1$  Hz, 1H), 7.22-7.13 (m, 3H), 6.64 (d,  $J = 8.4$  Hz, 1H), 3.04 (td,  $J = 7.7, 2.4$  Hz, 2H), 2.67 (td,  $J = 8.1, 5.5$  Hz, 2H).  $^{13}\text{C}$  NMR (100 MHz,  $\text{CDCl}_3$ )  $\delta$  158.3 (d,  $J = 269.7$  Hz), 135.0, 133.8 (d,  $J = 5.4$  Hz), 132.0, 131.8 (d,  $J = 1.9$  Hz), 131.7, 130.3, 129.5, 126.6 (d,  $J = 6.9$  Hz), 121.7, 119.9 (d,  $J = 2.8$  Hz), 115.9 (d,  $J = 13.5$  Hz), 28.3 (d,  $J = 6.6$  Hz), 25.0 (d,  $J = 24.5$  Hz).  $^{19}\text{F}$  NMR (376 MHz,

CDCl<sub>3</sub>)  $\delta$  -100.5. IR (neat)  $\nu$  2922, 2841, 1660, 1483, 1228, 929, 876, 824, 806 cm<sup>-1</sup>. HRMS (EI) Calcd. for C<sub>16</sub>H<sub>11</sub>Br<sub>2</sub>F requires [M]<sup>+</sup>: 379.9206, Found: 379.9203.

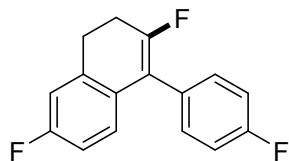

**Compound 2d:** colorless oil (24.5 mg, 47%). <sup>1</sup>H NMR (400 MHz, CDCl<sub>3</sub>, TMS)  $\delta$  7.30-7.21 (m, 2H), 7.11 (t,  $J$  = 8.5 Hz, 2H), 6.88 (dd,  $J$  = 8.7, 1.6 Hz, 1H), 6.82-6.66 (m, 2H), 3.08-2.99 (m, 2H), 2.68 (td,  $J$  = 8.1, 5.9 Hz, 2H). <sup>13</sup>C NMR (100 MHz, CDCl<sub>3</sub>)  $\delta$  162.2 (d,  $J$  = 245.1 Hz), 161.3 (dd,  $J$  = 244.6, 2.5 Hz), 157.5 (dd,  $J$  = 266.9, 2.1 Hz), 135.2 (d,  $J$  = 7.6 Hz), 131.8 (dd,  $J$  = 8.0, 1.9 Hz), 131.1 (dd,  $J$  = 5.3, 3.2 Hz), 129.3 (dd,  $J$  = 3.5, 1.0 Hz), 126.5 (dd,  $J$  = 7.8, 7.1 Hz), 115.7 (d,  $J$  = 13.7 Hz), 115.4 (d,  $J$  = 21.2 Hz), 114.6 (d,  $J$  = 22.0 Hz), 112.9 (d,  $J$  = 21.1 Hz), 28.6 (dd,  $J$  = 6.7, 1.6 Hz), 24.9 (d,  $J$  = 24.9 Hz). <sup>19</sup>F NMR (376 MHz, CDCl<sub>3</sub>)  $\delta$  -103.3, -114.5, -116.4. IR (neat)  $\nu$  3040, 2951, 1671, 1494, 1245, 1222, 1097, 830, 800 cm<sup>-1</sup>. HRMS (EI) Calcd. for C<sub>16</sub>H<sub>11</sub>F<sub>3</sub> requires [M]<sup>+</sup>: 260.0807, Found: 260.0808.

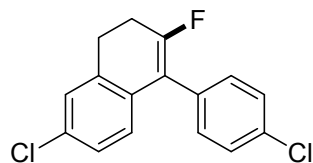

**Compound 2e:** colorless oil (26.0 mg, 44%). <sup>1</sup>H NMR (400 MHz, CDCl<sub>3</sub>, TMS)  $\delta$  7.39 (d,  $J$  = 8.3 Hz, 2H), 7.23 (t,  $J$  = 6.9 Hz, 2H), 7.17-7.10 (m, 1H), 7.06-6.98 (m, 1H), 6.69 (d,  $J$  = 8.3 Hz, 1H), 3.03 (dt,  $J$  = 8.5, 4.2 Hz, 2H), 2.67 (td,  $J$  = 8.2, 5.6 Hz, 2H). <sup>13</sup>C NMR (100 MHz, CDCl<sub>3</sub>)  $\delta$  158.3 (d,  $J$  = 269.2 Hz), 134.7, 133.5, 133.4 (d,  $J$  = 5.3 Hz), 131.8 (d,  $J$  = 2.8 Hz), 131.6 (d,  $J$  = 0.8 Hz), 131.4 (d,  $J$  = 2.0 Hz), 128.7, 127.5, 126.5, 126.3 (d,  $J$  = 7.0 Hz), 115.8 (d,  $J$  = 13.5 Hz), 28.4 (d,  $J$  = 6.7 Hz), 25.0 (d,  $J$  = 24.6 Hz). <sup>19</sup>F NMR (376 MHz, CDCl<sub>3</sub>)  $\delta$  -100.9. IR (neat)  $\nu$  3026, 2961, 1667, 1438, 1087, 999, 930, 825, 812, 723 cm<sup>-1</sup>. HRMS (EI) Calcd. for C<sub>16</sub>H<sub>11</sub>Cl<sub>2</sub>F requires [M]<sup>+</sup>: 292.0216, Found: 292.0220.

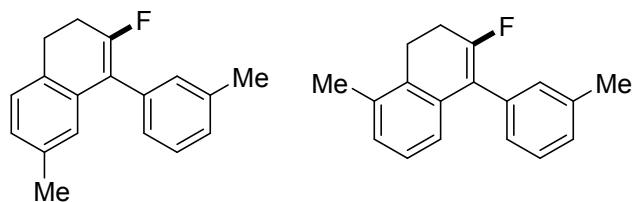

**Compound 2f & 2f':** (4 : 1), colorless oil (27.3 g, 54%). <sup>1</sup>H NMR (400 MHz, CDCl<sub>3</sub>, TMS)  $\delta$  7.32 (t,  $J$  = 7.4 Hz, 1H), 7.21-6.90 (m, 2H), 6.68-6.65 (m, 1H), 3.06-2.96 (m, 1H), 2.73-2.62 (m, 1H), 2.40-

2.35 (m, 1H). 2.33 (s, 2.4H), 2.18 (s, 0.6H).  $^{13}\text{C}$  NMR (100 MHz,  $\text{CDCl}_3$ )  $\delta$  158.0 (d,  $J = 266.7$  Hz), 157.4 (d,  $J = 266.0$  Hz), 137.9, 137.8, 136.0, 135.4 (d,  $J = 5.3$  Hz), 135.2 (d,  $J = 5.3$  Hz), 134.7, 133.9, 133.6, 131.0, 130.84, 130.82, 129.8, 128.3 (d,  $J = 1.8$  Hz), 128.2, 128.14, 128.10, 127.25 (d,  $J = 1.6$  Hz), 127.19 (d,  $J = 1.8$  Hz), 127.1, 126.7 (d,  $J = 2.1$  Hz), 126.1, 126.01, 125.98, 123.6 (d,  $J = 6.7$  Hz), 117.3 (d,  $J = 13.0$  Hz), 28.3 (d,  $J = 6.7$  Hz), 25.4 (d,  $J = 24.7$  Hz), 24.8 (d,  $J = 24.1$  Hz), 24.7 (d,  $J = 7.9$  Hz), 21.5, 21.4, 21.1, 19.8.  $^{19}\text{F}$  NMR (376 MHz,  $\text{CDCl}_3$ )  $\delta$  -102.1, -102.7. IR (neat)  $\nu$  3037, 2919, 1601, 1513, 1409, 1230, 974, 802, 189, 715  $\text{cm}^{-1}$ . HRMS (EI) Calcd. for  $\text{C}_{18}\text{H}_{17}\text{F}$  requires  $[\text{M}]^+$ : 252.1309, Found: 252.1307.

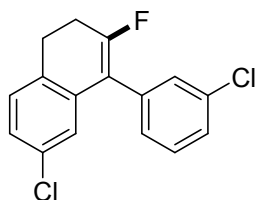

**Compound 2g:** colorless oil (21.6 mg, 37%).  $^1\text{H}$  NMR (400 MHz,  $\text{CDCl}_3$ , TMS)  $\delta$  7.38-7.27 (m, 3H), 7.21-7.12 (m, 2H), 7.01 (t,  $J = 7.9$  Hz, 1H), 6.66 (d,  $J = 7.6$  Hz, 1H), 3.21 (td,  $J = 8.2, 2.3$  Hz, 2H), 2.72 (td,  $J = 8.3, 5.2$  Hz, 2H).  $^{13}\text{C}$  NMR (100 MHz,  $\text{CDCl}_3$ )  $\delta$  158.8 (d,  $J = 270.1$  Hz), 136.7 (d,  $J = 5.2$  Hz), 135.2 (d,  $J = 0.9$  Hz), 134.3, 133.1, 130.4, 130.2 (d,  $J = 2.0$  Hz), 129.7, 128.4 (d,  $J = 1.8$  Hz), 127.8, 127.5 (d,  $J = 2.0$  Hz), 127.4, 123.8 (d,  $J = 6.7$  Hz), 115.9 (d,  $J = 13.6$  Hz), 25.1 (d,  $J = 6.8$  Hz), 24.4 (d,  $J = 24.3$  Hz).  $^{19}\text{F}$  NMR (376 MHz,  $\text{CDCl}_3$ )  $\delta$  -99.7. IR (neat)  $\nu$  3060, 2940, 2840, 1671, 1495, 1246, 1223, 946, 834, 760, 700  $\text{cm}^{-1}$ . HRMS (EI) Calcd. for  $\text{C}_{16}\text{H}_{11}\text{Cl}_2\text{F}$  requires  $[\text{M}]^+$ : 292.0216, Found: 292.0210.

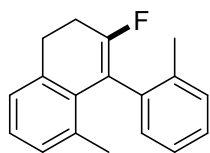

**Compound 2h:** colorless oil (18.2 mg, 36%).  $^1\text{H}$  NMR (400 MHz,  $\text{CDCl}_3$ , TMS)  $\delta$  7.23-7.14 (m, 4H), 7.06 (d,  $J = 7.2$  Hz, 1H), 7.01 (t,  $J = 7.4$  Hz, 1H), 6.87 (d,  $J = 7.4$  Hz, 1H), 3.08-2.91 (m, 2H), 2.66-2.50 (m, 2H), 2.14 (s, 3H), 1.56 (s, 3H).  $^{13}\text{C}$  NMR (100 MHz,  $\text{CDCl}_3$ )  $\delta$  159.4 (d,  $J = 268.5$  Hz), 136.9 (d,  $J = 1.0$  Hz), 135.8 (d,  $J = 1.4$  Hz), 135.3 (d,  $J = 6.3$  Hz), 135.0, 133.4 (d,  $J = 5.1$  Hz), 130.7, 130.1 (d,  $J = 1.9$  Hz), 129.9, 127.3, 126.1 (d,  $J = 1.6$  Hz), 125.5, 125.3, 116.7 (d,  $J = 14.0$  Hz), 30.5 (d,  $J = 4.4$  Hz), 25.2 (d,  $J = 25.5$  Hz), 21.7, 19.9 (d,  $J = 1.9$  Hz).  $^{19}\text{F}$  NMR (376 MHz,  $\text{CDCl}_3$ )  $\delta$  -97.3. IR (neat)  $\nu$  3058, 2951, 1656, 1461, 1360, 928, 761, 737  $\text{cm}^{-1}$ . HRMS (EI) Calcd. for  $\text{C}_{18}\text{H}_{17}\text{F}$  requires  $[\text{M}]^+$ : 252.1309,

Found: 252.1309.

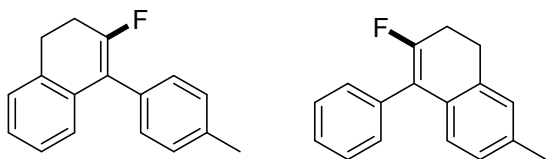

**Compound 2j & 2j'**: (1.1: 1): colorless oil (23.4 mg, 53%).  $^1\text{H}$  NMR (400 MHz,  $\text{CDCl}_3$ , TMS)  $\delta$  7.41 (t,  $J = 7.2$  Hz, 1H), 7.37-7.28 (m, 1.5H), 7.26-7.18 (m, 1.5H), 7.17-7.01 (m, 2H), 6.99 (s, 0.5H), 6.91-6.80 (m, 1H), 6.70 (d,  $J = 7.8$  Hz, 0.5H), 3.11-3.00 (m, 2H), 2.79-2.63 (m, 2H), 2.40 (s, 1.6H), 2.29 (s, 1.4H).  $^{13}\text{C}$  NMR (100 MHz,  $\text{CDCl}_3$ )  $\delta$  157.9 (d,  $J = 268.3$  Hz), 157.3 (d,  $J = 267.8$  Hz), 137.1, 135.9 (d,  $J = 2.3$  Hz), 135.4 (d,  $J = 5.4$  Hz), 133.8 (d,  $J = 1.0$  Hz), 132.9, 132.8, 132.4 (d,  $J = 5.2$  Hz), 130.6 (d,  $J = 1.0$  Hz), 130.2 (d,  $J = 1.9$  Hz), 130.0 (d,  $J = 1.8$  Hz), 129.1, 128.6, 128.3, 128.2, 127.3, 127.2, 127.0, 126.4, 126.09, 126.07, 125.31 (d,  $J = 6.8$  Hz), 125.26 (d,  $J = 6.8$  Hz), 28.8 (d,  $J = 1.6$  Hz), 28.7 (d,  $J = 1.6$  Hz), 25.3 (d,  $J = 24.7$  Hz), 25.2 (d,  $J = 24.8$  Hz), 21.3, 21.0.  $^{19}\text{F}$  NMR (376 MHz,  $\text{CDCl}_3$ )  $\delta$  -102.4, -103.7. IR (neat)  $\nu$  3026, 2943, 1669, 1483, 1360, 1151, 817, 760, 743  $\text{cm}^{-1}$ . HRMS (EI) Calcd. for  $\text{C}_{17}\text{H}_{15}\text{F}$  requires  $[\text{M}]^+$ : 238.1152, Found: 238.1150.

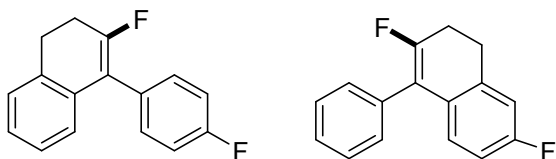

**Compound 2k & 2k'**: (1 : 1.3), colorless oil (21.8 mg, 45%); M.p. 83-85  $^\circ\text{C}$ .  $^1\text{H}$  NMR (400 MHz,  $\text{CDCl}_3$ , TMS)  $\delta$  7.44-7.22 (m, 4H), 7.19-7.02 (m, 2H), 6.87 (dd,  $J = 9.0, 2.0$  Hz, 0.5H), 6.80-6.70 (m, 1.5 H), 3.10-3.00 (m, 2H), 2.67 (td,  $J = 8.2, 5.4$  Hz, 2H).  $^{13}\text{C}$  NMR (100 MHz,  $\text{CDCl}_3$ )  $\delta$  162.1 (d,  $J = 244.8$  Hz), 161.3 (dd,  $J = 244.3, 2.6$  Hz), 158.3 (d,  $J = 267.6$  Hz), 157.3 (dd,  $J = 264.0, 2.6$  Hz), 135.2 (d,  $J = 7.5$  Hz), 135.1 (d,  $J = 5.2$  Hz), 133.5 (d,  $J = 0.8$  Hz), 132.8, 131.8 (dd,  $J = 8.0, 1.9$  Hz), 131.3 (dd,  $J = 5.3, 3.0$  Hz), 130.1 (d,  $J = 1.9$  Hz), 129.4 (d,  $J = 4.5$  Hz), 128.4, 127.5, 127.3, 126.7 (dd,  $J = 7.8, 0.6$  Hz), 126.5, 126.3 (d,  $J = 2.2$  Hz), 125.1 (d,  $J = 6.8$  Hz), 116.6 (d,  $J = 14.2$  Hz), 116.3 (d,  $J = 13.0$  Hz), 115.3 (d,  $J = 21.3$  Hz), 114.5 (d,  $J = 22.1$  Hz), 112.8 (d,  $J = 21.0$  Hz), 28.7 (dd,  $J = 6.8, 1.6$  Hz), 28.6 (d,  $J = 6.6$  Hz), 25.2 (d,  $J = 25.0$  Hz), 24.8 (d,  $J = 25.2$  Hz).  $^{19}\text{F}$  NMR (376 MHz,  $\text{CDCl}_3$ )  $\delta$  -101.9, -103.5, -114.7, -116.6. IR (neat)  $\nu$  3024, 2922, 1733, 1494, 1246, 1223, 1158, 834, 760  $\text{cm}^{-1}$ . HRMS (EI) Calcd. for  $\text{C}_{16}\text{H}_{12}\text{F}_2$  requires  $[\text{M}]^+$ : 242.0902, Found: 242.0901.

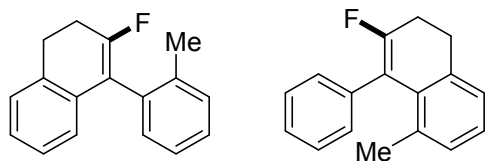

**Compound 2l & 2l'**: (2 : 1), colorless oil (18.1 mg, 38%).  $^1\text{H}$  NMR (400 MHz,  $\text{CDCl}_3$ , TMS)  $\delta$  7.38-7.20 (m, 3.7H), 7.16 (d,  $J = 7.1$  Hz, 1.3H), 7.12-6.99 (m, 2H), 6.92 (d,  $J = 6.1$  Hz, 0.3H), 6.55 (d,  $J = 7.5$  Hz, 0.7H), 3.11 (dt,  $J = 8.3, 4.1$  Hz, 1.3H), 3.02-2.93 (m, 0.7H), 2.71 (td,  $J = 8.3, 4.6$  Hz, 1.3H), 2.63-2.50 (m, 0.7H), 2.16 (s, 2H), 1.64 (s, 1H).  $^{13}\text{C}$  NMR (100 MHz,  $\text{CDCl}_3$ )  $\delta$  159.7 (d,  $J = 271.6$  Hz), 157.8 (d,  $J = 265.5$  Hz), 137.4 (d,  $J = 0.9$  Hz), 136.2, 135.9, 135.5 (d,  $J = 6.0$  Hz), 135.0 (d,  $J = 5.9$  Hz), 133.7 (d,  $J = 4.9$  Hz), 133.1 (d,  $J = 1.7$  Hz), 132.4, 130.54, 130.50 (d,  $J = 1.5$  Hz), 130.0, 129.2 (d,  $J = 2.5$  Hz), 128.1, 127.8, 127.2, 126.7, 126.6, 126.2 (d,  $J = 1.6$  Hz), 126.1 (d,  $J = 2.2$  Hz), 125.8, 124.9, 124.7 (d,  $J = 6.8$  Hz), 117.1 (d,  $J = 11.6$  Hz), 116.5 (d,  $J = 15.1$  Hz), 30.4 (d,  $J = 3.6$  Hz), 28.7 (d,  $J = 7.0$  Hz), 25.6 (d,  $J = 25.4$  Hz), 25.0 (d,  $J = 24.4$  Hz), 22.6, 19.6.  $^{19}\text{F}$  NMR (376 MHz,  $\text{CDCl}_3$ )  $\delta$  -100.0, -100.8. IR (neat)  $\nu$  3019, 2945, 1674, 1483, 1361, 1151, 931, 762, 752, 732  $\text{cm}^{-1}$ . HRMS (EI) Calcd. for  $\text{C}_{18}\text{H}_{17}\text{F}$  requires  $[\text{M}]^+$ : 238.1152, Found: 238.1147.

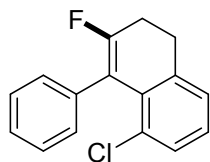

**Compound 2m**: colorless oil (18.3 mg, 35%).  $^1\text{H}$  NMR (400 MHz,  $\text{CDCl}_3$ , TMS)  $\delta$  7.49 (dt,  $J = 7.4, 3.6$  Hz, 1H), 7.36-7.31 (m, 3H), 7.29-7.25 (m, 1H), 7.17 (d,  $J = 7.2$  Hz, 1H), 7.14-7.03 (m, 2H), 6.56 (d,  $J = 8.1$  Hz, 1H), 3.18-3.04 (m, 2H), 2.76-2.69 (m, 2H).  $^{13}\text{C}$  NMR (100 MHz,  $\text{CDCl}_3$ )  $\delta$  158.8 (d,  $J = 268.3$  Hz), 134.6, 134.2 (d,  $J = 5.3$  Hz), 132.7 (d,  $J = 1.5$  Hz), 132.2 (d,  $J = 2.2$  Hz), 129.7, 129.2, 127.3, 126.8, 126.6, 126.3 (d,  $J = 2.1$  Hz), 124.5 (d,  $J = 6.7$  Hz), 28.6 (d,  $J = 7.0$  Hz), 25.0 (d,  $J = 23.7$  Hz).  $^{19}\text{F}$  NMR (376 MHz,  $\text{CDCl}_3$ )  $\delta$  -98.6. IR (neat)  $\nu$  3060, 2943, 1679, 1485, 1363, 1231, 1153, 1060, 935, 752, 733, 715  $\text{cm}^{-1}$ . HRMS (EI) Calcd. for  $\text{C}_{16}\text{H}_{12}\text{ClF}$  requires  $[\text{M}]^+$ : 258.0606, Found: 258.0600.

## 7. Spectroscopy of compounds 3

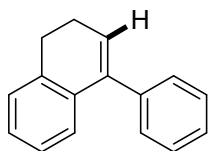

**Compound 3a:** colorless oil (31.2 mg, 76%).  $^1\text{H}$  NMR (400 MHz,  $\text{CDCl}_3$ , TMS)  $\delta$  7.41-7.29 (m, 5H), 7.23-7.08 (m, 3H), 7.00 (d,  $J = 7.5$  Hz, 1H), 6.09 (t,  $J = 4.6$  Hz, 1H), 2.85 (t,  $J = 8.0$  Hz, 2H), 2.41 (td,  $J = 7.9, 4.7$  Hz, 2H).  $^{13}\text{C}$  NMR (100 MHz,  $\text{CDCl}_3$ )  $\delta$  140.8, 139.9, 136.8, 135.1, 128.7, 128.2, 127.6, 127.5, 127.1, 127.0, 126.2, 125.4, 28.3, 23.5. IR (neat)  $\nu$  3026, 2917, 1716, 1660, 1447, 1268, 927, 756, 699  $\text{cm}^{-1}$ . HRMS (EI) Calcd. for  $\text{C}_{16}\text{H}_{14}$  requires  $[\text{M}]^+$ : 206.1090, Found: 206.1088.

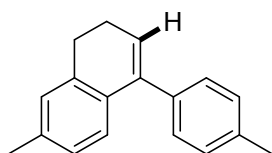

**Compound 3b:** colorless oil (29.9 mg, 64%).  $^1\text{H}$  NMR (400 MHz,  $\text{CDCl}_3$ , TMS)  $\delta$  7.23 (d,  $J = 8.1$  Hz, 2H), 7.17 (d,  $J = 7.8$  Hz, 2H), 7.02 (s, 1H), 6.93-6.87 (m, 2H), 6.00 (t,  $J = 4.6$  Hz, 1H), 2.80 (t,  $J = 7.9$  Hz, 2H), 2.37 (m, 5H), 2.32 (s, 3H).  $^{13}\text{C}$  NMR (100 MHz,  $\text{CDCl}_3$ )  $\delta$  139.5, 138.0, 136.8, 136.63, 136.61, 132.5, 128.8, 128.6, 128.4, 126.7, 126.2, 125.4, 28.4, 23.6, 21.2, 21.1. IR (neat)  $\nu$  2921, 2859, 1713, 1655, 1605, 1276, 1040, 820, 794  $\text{cm}^{-1}$ . HRMS (EI) Calcd. for  $\text{C}_{18}\text{H}_{18}$  requires  $[\text{M}]^+$ : 234.1403, Found: 234.1401.

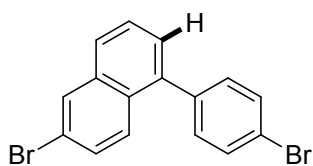

**Compound 3c:** colorless oil (39.1 mg, 54%).  $^1\text{H}$  NMR (400 MHz,  $\text{CDCl}_3$ , TMS)  $\delta$  8.06 (d,  $J = 1.8$  Hz, 1H), 7.77 (d,  $J = 8.2$  Hz, 1H), 7.70 (d,  $J = 9.0$  Hz, 1H), 7.66-7.59 (m, 2H), 7.58-7.47 (m, 2H), 7.39 (d,  $J = 7.0$  Hz, 1H), 7.36-7.29 (m, 2H).  $^{13}\text{C}$  NMR (100 MHz,  $\text{CDCl}_3$ )  $\delta$  139.1, 139.0, 134.9, 131.6, 130.3, 129.9, 129.6, 127.5, 127.2, 127.1, 126.5, 121.8, 120.1. IR (neat)  $\nu$  3045, 2919, 1583, 1494, 1070, 958, 829, 777, 740  $\text{cm}^{-1}$ . HRMS (EI) Calcd. for  $\text{C}_{16}\text{H}_{10}\text{Br}_2$  requires  $[\text{M}]^+$ : 359.9144, Found: 359.9145.

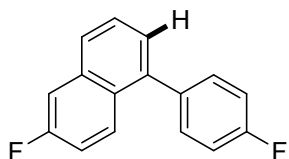

**Compound 3d:** colorless oil (32.2 mg, 67%).  $^1\text{H}$  NMR (400 MHz,  $\text{CDCl}_3$ , TMS)  $\delta$  7.86-7.75 (m, 2H), 7.56-7.48 (m, 2H), 7.46-7.38 (m, 2H), 7.34 (d,  $J = 7.0$  Hz, 1H), 7.24-7.14 (m, 3H).  $^{13}\text{C}$  NMR (100 MHz,  $\text{CDCl}_3$ )  $\delta$  162.4 (d,  $J = 245.0$  Hz), 160.5 (d,  $J = 245.3$  Hz), 139.4 (d,  $J = 1.0$  Hz), 136.4 (d,  $J = 3.4$  Hz), 134.7 (d,  $J = 9.1$  Hz), 131.5 (d,  $J = 7.9$  Hz), 128.7, 128.5 (d,  $J = 8.8$  Hz), 127.1 (d,  $J = 5.2$  Hz), 126.5, 126.2 (d,  $J = 2.1$  Hz), 116.3 (d,  $J = 24.8$  Hz), 115.3 (d,  $J = 21.2$  Hz), 111.2 (d,  $J = 20.1$  Hz).  $^{19}\text{F}$  NMR (376 MHz,  $\text{CDCl}_3$ )  $\delta$  -115.1, -115.3. IR (neat)  $\nu$  3050, 2924, 1626, 1607, 1506, 1220, 863.95, 839, 826, 784  $\text{cm}^{-1}$ . HRMS (EI) Calcd. for  $\text{C}_{16}\text{H}_{10}\text{F}_2$  requires  $[\text{M}]^+$ : 240.0745, Found: 240.0742.

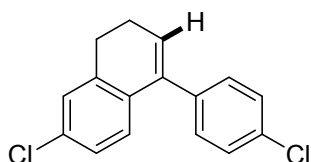

**Compound 3e:** colorless oil (31.4 mg, 57%).  $^1\text{H}$  NMR (400 MHz,  $\text{CDCl}_3$ , TMS)  $\delta$  7.34 (d,  $J = 7.7$  Hz, 2H), 7.24 (d,  $J = 8.0$  Hz, 2H), 7.18 (s, 1H), 7.07 (d,  $J = 8.2$  Hz, 1H), 6.87 (d,  $J = 8.2$  Hz, 1H), 6.06 (d,  $J = 5.1$  Hz, 1H), 2.81 (t,  $J = 7.8$  Hz, 2H), 2.39 (q,  $J = 5.9$  Hz, 2H).  $^{13}\text{C}$  NMR (100 MHz,  $\text{CDCl}_3$ )  $\delta$  138.7, 138.6, 138.1, 133.2, 133.1, 132.5, 129.9, 128.5, 128.2, 127.7, 126.4, 126.2, 28.0, 23.2. IR (neat)  $\nu$  3032, 2948, 2830, 1550, 1491, 1090, 1012, 959, 840, 823, 808  $\text{cm}^{-1}$ . HRMS (EI) Calcd. for  $\text{C}_{16}\text{H}_{12}\text{Cl}_2$  requires  $[\text{M}]^+$ : 274.0311, Found: 274.0309.

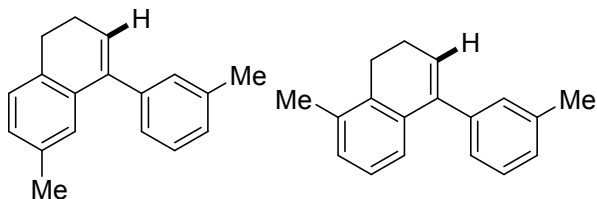

**Compound 3f & 3f':** (2 : 1), colorless oil (34.2 g, 73%).  $^1\text{H}$  NMR (400 MHz,  $\text{CDCl}_3$ , TMS)  $\delta$  7.27-7.22 (m, 1H), 7.18-6.95 (m, 5H), 6.88-6.80 (m, 1H), 6.05 (t,  $J = 4.7$  Hz, 1H), 2.80 (t,  $J = 8.0$  Hz, 2H), 2.42-2.28 (m, 7.1H), 2.22 (s, 0.9H).  $^{13}\text{C}$  NMR (100 MHz,  $\text{CDCl}_3$ )  $\delta$  141.2, 140.9, 140.2, 140.0, 137.8, 137.7, 135.6, 135.1, 135.0, 134.7, 133.7, 129.5, 129.4, 129.1, 128.05, 128.00, 127.73, 127.68, 127.6, 127.5, 127.4, 127.0, 126.2, 125.9, 125.8, 125.4, 123.1, 27.9, 23.9, 23.7, 23.2, 21.5, 21.4, 21.2, 19.8. IR (neat)  $\nu$  2942, 2914, 1674, 1460, 1227, 1151, 961, 781, 725, 702  $\text{cm}^{-1}$ . HRMS (EI) Calcd. for  $\text{C}_{18}\text{H}_{18}$  requires  $[\text{M}]^+$ : 234.1403, Found: 234.1398.



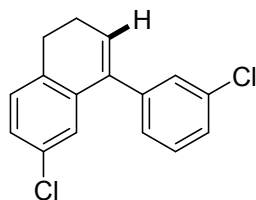

**Compound 3g:** colorless oil (39.6 mg, 72%).  $^1\text{H}$  NMR (400 MHz,  $\text{CDCl}_3$ , TMS)  $\delta$  7.33-7.28 (m, 2H), 7.24 (d,  $J = 8.5$  Hz, 1H), 7.20-7.15 (m, 1H), 7.04 (t,  $J = 7.9$  Hz, 1H), 6.85 (d,  $J = 7.7$  Hz, 1H), 6.12 (t,  $J = 4.7$  Hz, 1H), 2.98 (t,  $J = 8.1$  Hz, 2H), 2.42 (td,  $J = 8.1, 4.8$  Hz, 2H).  $^{13}\text{C}$  NMR (100 MHz,  $\text{CDCl}_3$ )  $\delta$  142.3, 138.4, 136.5, 134.2, 134.1, 133.1, 129.5, 129.2, 128.8, 128.2, 127.4, 126.9, 126.8, 123.9, 24.3, 22.8. IR (neat)  $\nu$  3060, 2930, 1589, 1561, 1389, 1094, 1001, 779, 707  $\text{cm}^{-1}$ . HRMS (EI) Calcd. for  $\text{C}_{16}\text{H}_{12}\text{Cl}_2$  requires  $[\text{M}]^+$ : 274.0311, Found: 274.0309.

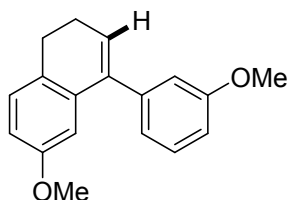

**Compound 3h:** colorless oil (35.2 mg, 66%).  $^1\text{H}$  NMR (400 MHz,  $\text{CDCl}_3$ , TMS)  $\delta$  7.26 (t,  $J = 7.7$  Hz, 1H), 7.07 (t,  $J = 8.0$  Hz, 1H), 6.94-6.83 (m, 2H), 6.79 (d,  $J = 8.2$  Hz, 1H), 6.67 (d,  $J = 7.7$  Hz, 1H), 6.09 (t,  $J = 4.6$  Hz, 1H), 3.85 (s, 3H), 3.80 (s, 3H), 2.85 (t,  $J = 8.1$  Hz, 2H), 2.36 (td,  $J = 8.1, 4.8$  Hz, 2H).  $^{13}\text{C}$  NMR (100 MHz,  $\text{CDCl}_3$ )  $\delta$  159.4, 156.0, 142.5, 139.6, 136.0, 129.0, 127.9, 126.1, 124.6, 121.3, 118.6, 114.2, 112.7, 109.7, 55.6, 55.2, 22.9, 19.8. IR (neat)  $\nu$  2932, 2833, 1573, 1460, 1435, 1258, 1041, 782, 763, 702  $\text{cm}^{-1}$ . HRMS (EI) Calcd. for  $\text{C}_{18}\text{H}_{18}\text{O}_2$  requires  $[\text{M}]^+$ : 266.1301, Found: 266.1301.

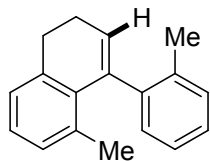

**Compound 3i:** colorless oil (24.8 mg, 53%).  $^1\text{H}$  NMR (400 MHz,  $\text{CDCl}_3$ , TMS)  $\delta$  7.24-7.16 (m, 3H), 7.14-7.01 (m, 3H), 6.89 (d,  $J = 7.3$  Hz, 1H), 6.10 (dd,  $J = 5.8, 4.3$  Hz, 1H), 2.81-2.73 (m, 2H), 2.35-2.21 (m, 2H), 1.99 (s, 3H), 1.61 (s, 3H).  $^{13}\text{C}$  NMR (100 MHz,  $\text{CDCl}_3$ )  $\delta$  143.6, 140.3, 138.2, 135.4, 134.4, 133.9, 131.6, 130.2, 129.6, 129.0, 126.7, 126.6, 125.9, 125.4, 30.2, 23.1, 22.1, 20.0. IR (neat)  $\nu$  3021, 2926, 1664, 1459, 1163, 1033, 752, 727  $\text{cm}^{-1}$ . HRMS (EI) Calcd. for  $\text{C}_{18}\text{H}_{18}$  requires  $[\text{M}]^+$ : 234.1403, Found: 234.1399.

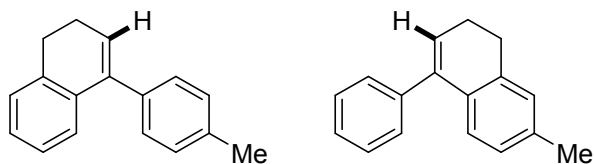

**Compound 3j & 3j'**: (1.1 : 1), colorless oil (32.6 mg, 74%).  $^1\text{H}$  NMR (400 MHz,  $\text{CDCl}_3$ , TMS)  $\delta$  7.38-7.28 (m, 2H), 7.25-7.06 (m, 4H), 7.01 (d,  $J = 6.9$  Hz, 1H), 6.89 (d,  $J = 8.1$  Hz, 1H), 6.08-6.00 (m, 1H), 2.87-2.78 (m, 2H), 2.43-2.34 (m, 3.6H), 2.32 (s, 1.4H).  $^{13}\text{C}$  NMR (100 MHz,  $\text{CDCl}_3$ )  $\delta$  140.9, 139.73, 139.68, 137.8, 136.8, 136.75, 136.71, 136.68, 135.2, 132.4, 128.9, 128.7, 128.65, 128.60, 128.4, 128.1, 127.5, 127.2, 127.0, 126.9, 126.7, 126.6, 126.1, 125.42, 125.38, 28.34, 28.30, 23.6, 23.5, 21.2, 21.1. IR (neat)  $\nu$  3021, 2924, 1728, 1659, 1446, 1180, 815, 757, 741  $\text{cm}^{-1}$ . HRMS (EI) Calcd. for  $\text{C}_{17}\text{H}_{16}$  requires  $[\text{M}]^+$ : 220.1247, Found: 220.1243.

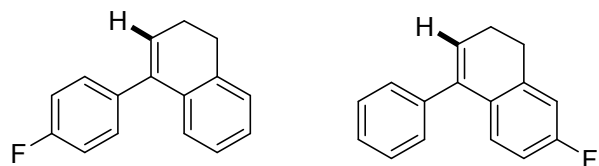

**Compound 3k & 3k'**: (1 : 2.5), colorless oil (29.4 mg, 66%).  $^1\text{H}$  NMR (400 MHz,  $\text{CDCl}_3$ , TMS)  $\delta$  7.40-7.27 (m, 3.6H), 7.22-7.03 (m, 2H), 6.98-6.88 (m, 1.7H), 6.77 (t,  $J = 8.6$  Hz, 0.7H), 6.04 (t,  $J = 5.7$  Hz, 1H), 2.83 (t,  $J = 7.0$  Hz, 2H), 2.40 (q,  $J = 6.5$  Hz, 2H).  $^{13}\text{C}$  NMR (100 MHz,  $\text{CDCl}_3$ )  $\delta$  163.3, 161.6 (d,  $J = 246.5$  Hz), 140.6, 139.3 (d,  $J = 7.5$  Hz), 139.1, 138.9, 136.73, 136.68, 134.9, 131.2 (d,  $J = 3.0$  Hz), 130.3 (d,  $J = 7.9$  Hz), 128.6, 128.3, 127.8, 127.6, 127.2, 127.1, 126.9 (d,  $J = 8.1$  Hz), 126.6 (d,  $J = 2.1$  Hz), 126.2, 125.2, 115.0 (d,  $J = 21.2$  Hz), 114.6 (d,  $J = 21.5$  Hz), 112.5 (d,  $J = 21.0$  Hz), 28.5 (d,  $J = 1.3$  Hz), 28.2, 23.5, 23.2.  $^{19}\text{F}$  NMR (376 MHz,  $\text{CDCl}_3$ )  $\delta$  -115.5, -115.7. IR (neat)  $\nu$  3024, 2935, 1603, 1493, 1240, 1222, 828, 763, 740, 701  $\text{cm}^{-1}$ . HRMS (EI) Calcd. for  $\text{C}_{16}\text{H}_{13}\text{F}$  requires  $[\text{M}]^+$ : 224.0996, Found: 224.0990.

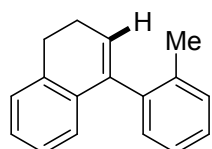

**Compound 3l**: colorless oil (22.3 mg, 51%).  $^1\text{H}$  NMR (400 MHz,  $\text{CDCl}_3$ , TMS)  $\delta$  7.28-7.15 (m, 5H), 7.15-7.10 (m, 1H), 7.04 (t,  $J = 7.9$  Hz, 1H), 6.61 (d,  $J = 7.6$  Hz, 1H), 5.93 (t,  $J = 4.5$  Hz, 1H), 2.94-2.82 (m, 2H), 2.47-2.39 (m, 2H), 2.10 (s, 3H).  $^{13}\text{C}$  NMR (100 MHz,  $\text{CDCl}_3$ )  $\delta$  140.4, 139.0, 136.5, 135.8,

135.2, 130.0, 129.8, 127.6, 127.4, 127.2, 126.8, 126.4, 125.7, 124.8, 28.2, 23.4, 19.9. IR (neat)  $\nu$  3016, 2927, 1485, 1040, 907, 755, 738, 727  $\text{cm}^{-1}$ . HRMS (EI) Calcd. for  $\text{C}_{18}\text{H}_{18}$  requires  $[\text{M}]^+$ : 234.1403, Found: 234.1397.

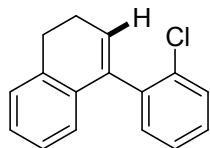

**Compound 3m:** colorless oil (22.1 mg, 46%).  $^1\text{H}$  NMR (400 MHz,  $\text{CDCl}_3$ , TMS)  $\delta$  7.34-7.28 (m, 2H), 7.28-7.22 (m, 3H), 7.20-7.14 (m, 2H), 7.09 (t,  $J = 7.6$  Hz, 1H), 6.32 (t,  $J = 5.3$  Hz, 1H), 2.76 (t,  $J = 7.6$  Hz, 2H), 2.33-2.25 (m, 2H).  $^{13}\text{C}$  NMR (100 MHz,  $\text{CDCl}_3$ )  $\delta$  142.2, 141.6, 139.1, 132.82, 132.76, 131.8, 129.5, 128.0, 127.7, 126.9, 126.5, 125.8, 30.1, 23.2. IR (neat)  $\nu$  3019, 2932, 1441, 1135, 876, 813, 776, 760  $\text{cm}^{-1}$ . HRMS (EI) Calcd. for  $\text{C}_{16}\text{H}_{13}\text{Cl}$  requires  $[\text{M}]^+$ : 240.0700, Found: 240.0693.

## 8. Reference

[1] J. Liu, Q. Li, Y. Wei, M. Shi, *Org. Lett.* 2020, **22**, 2494.

## 9. NMR Spectroscopy

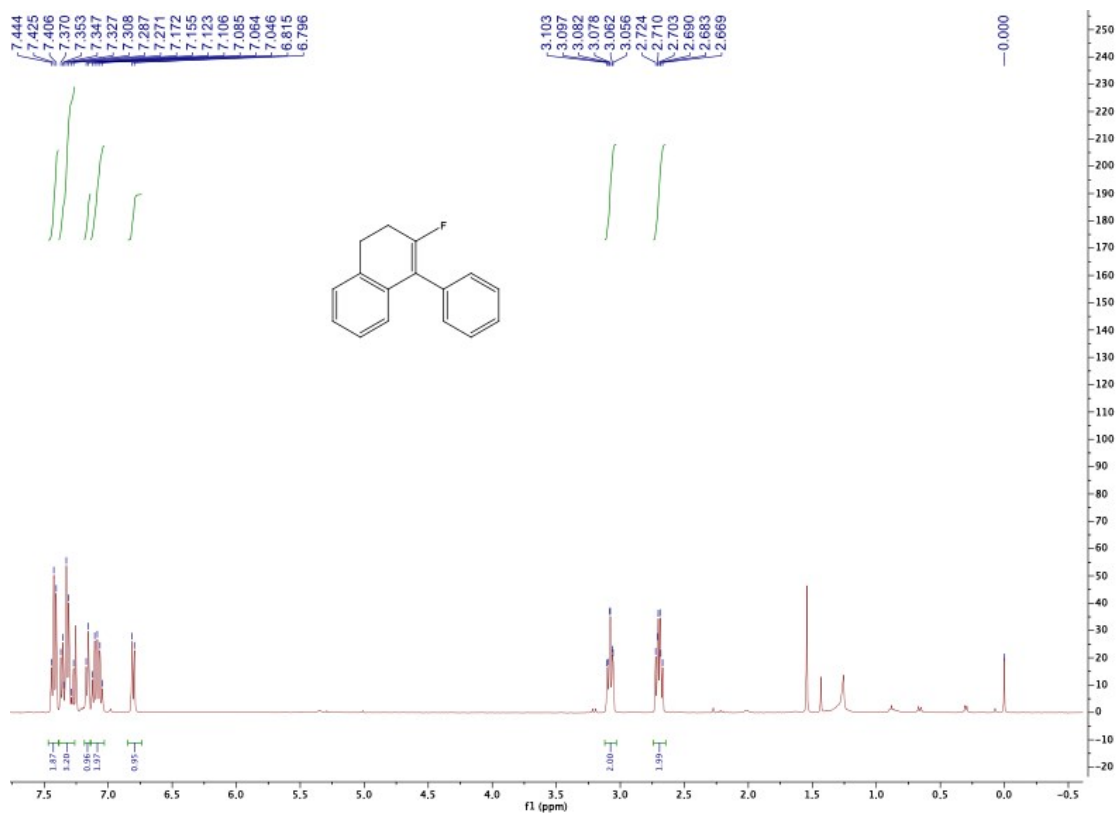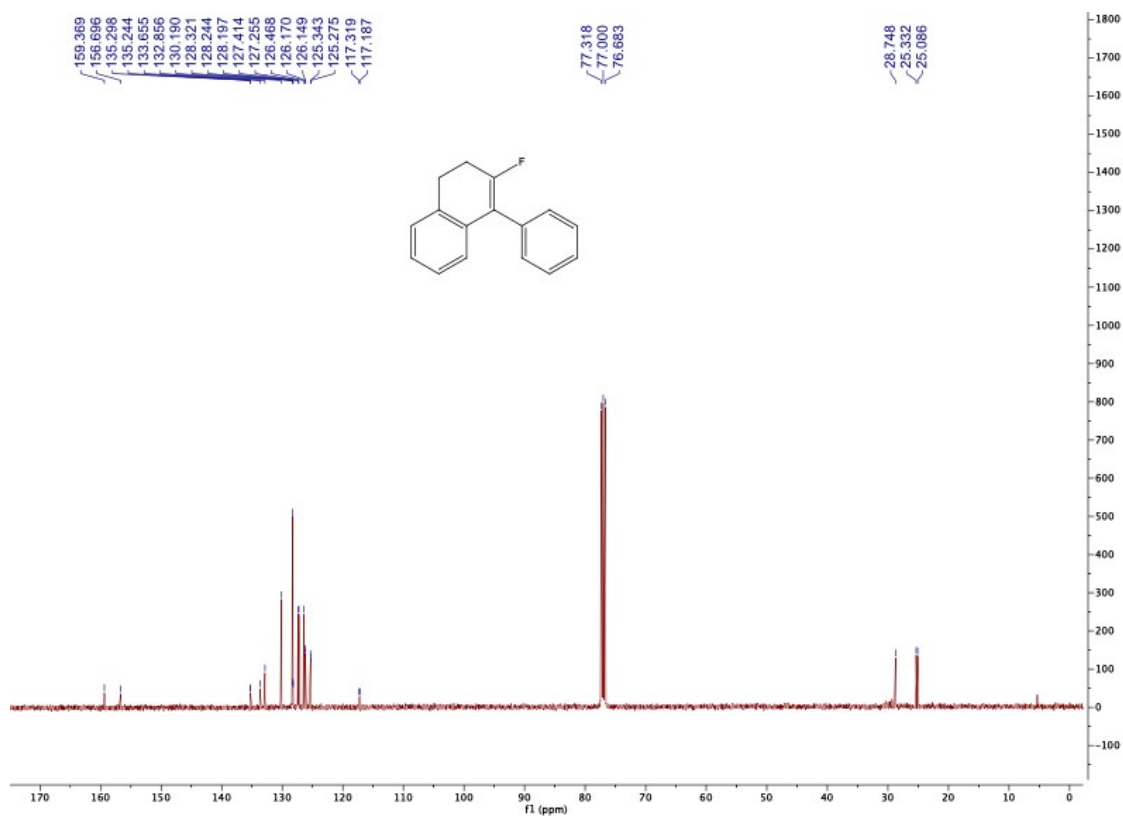

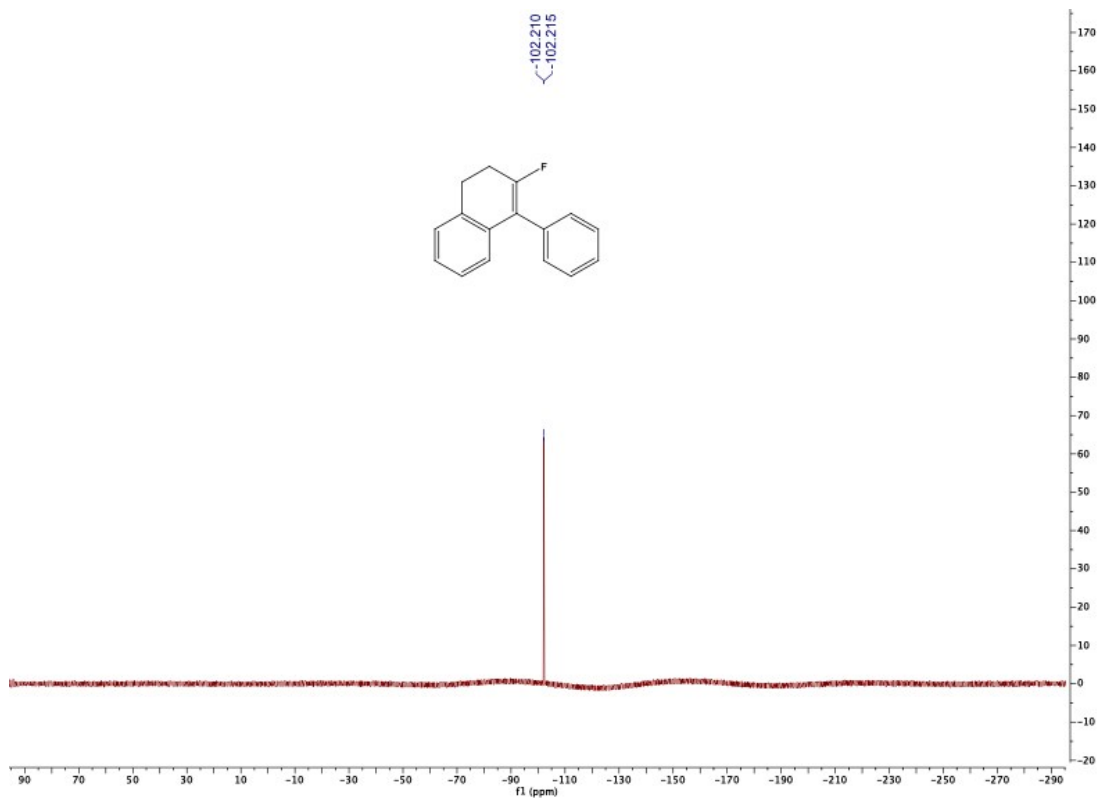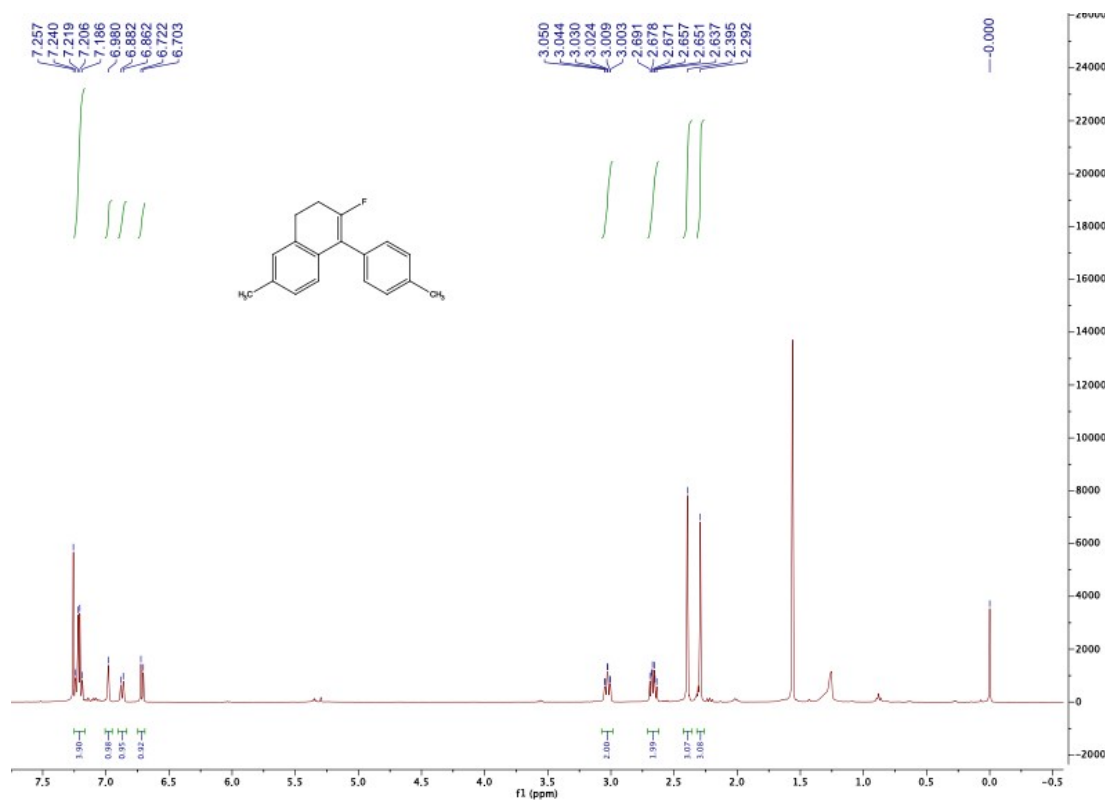

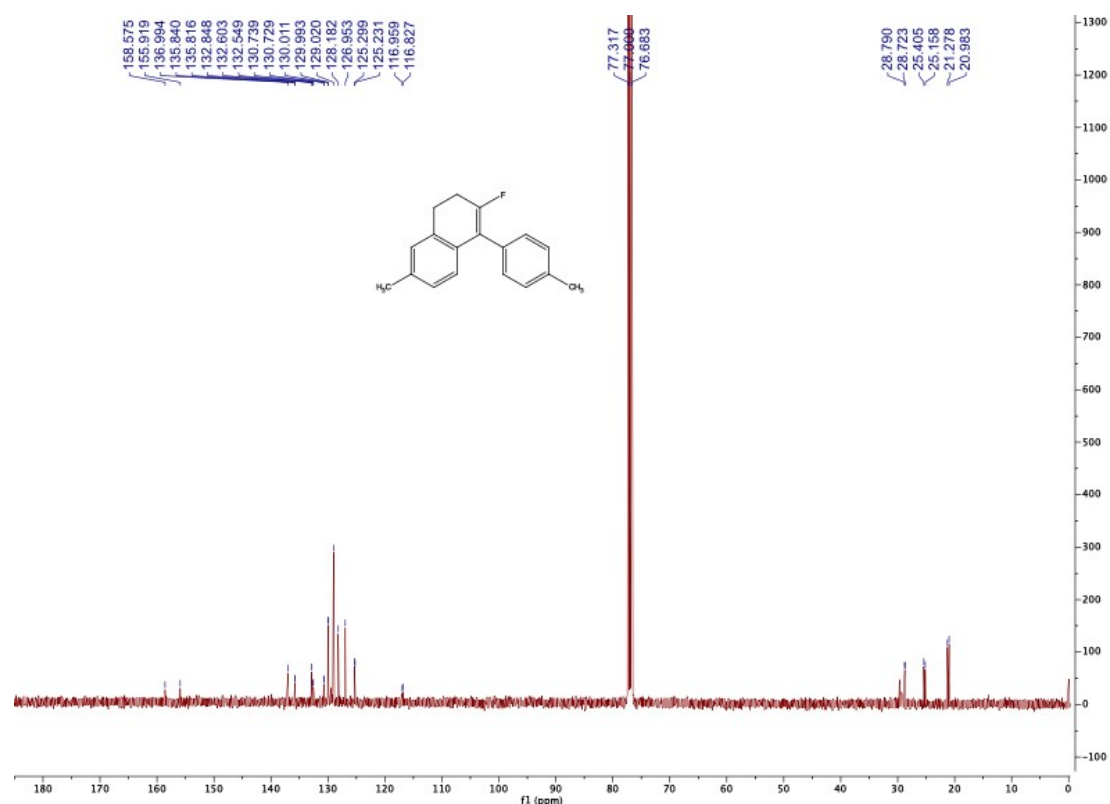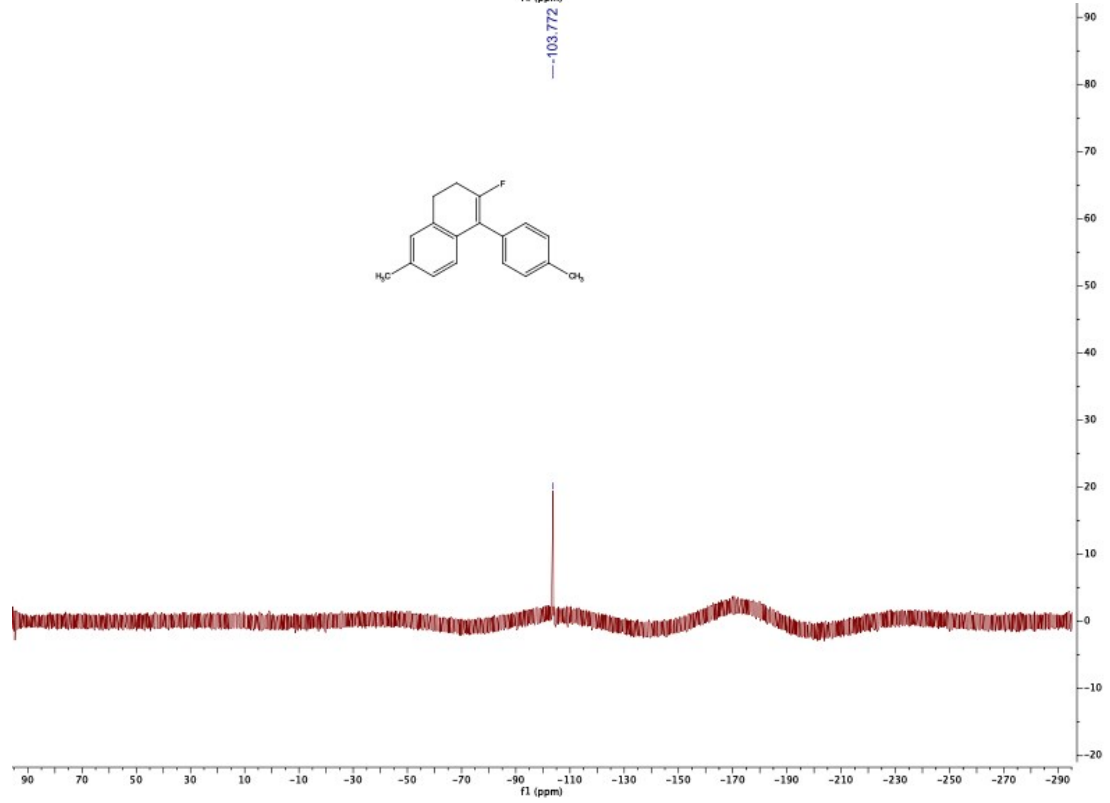

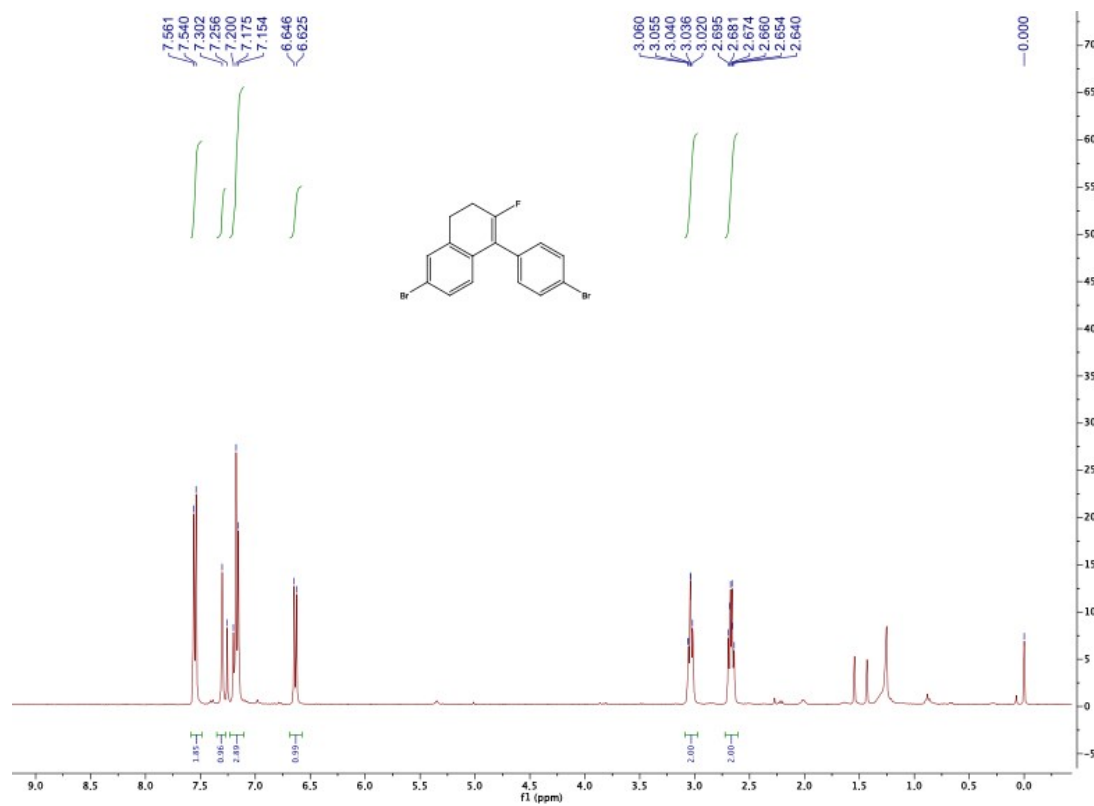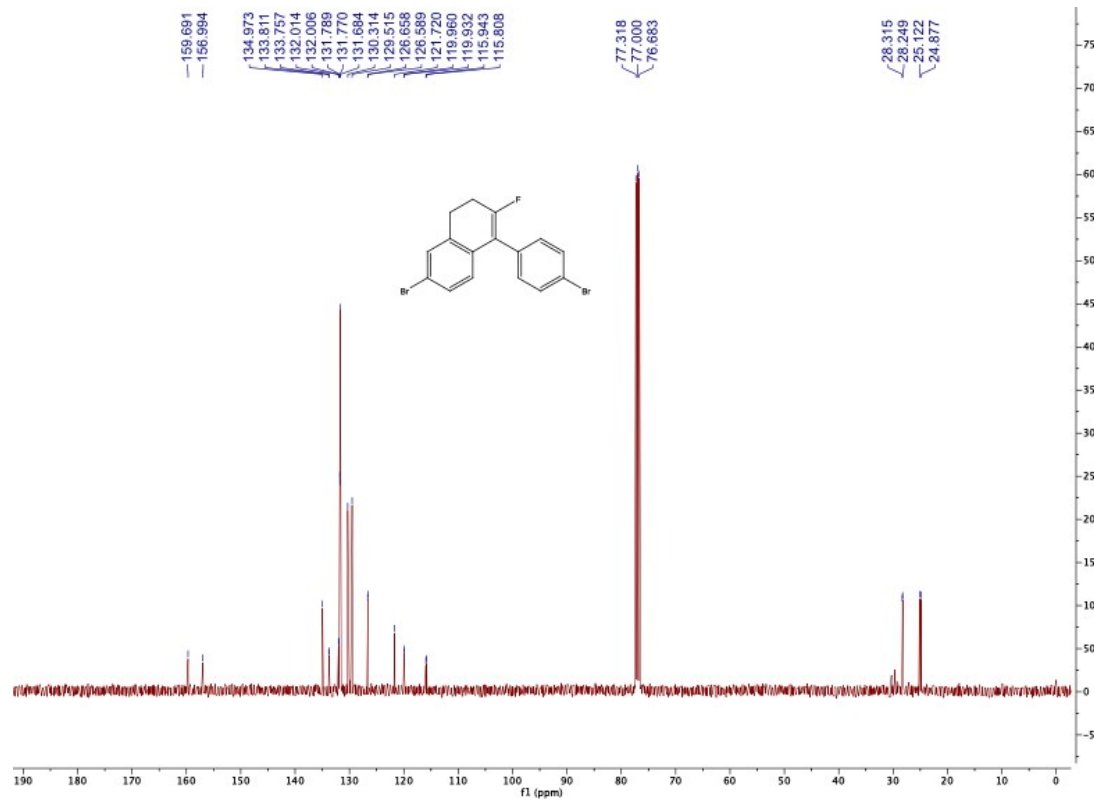



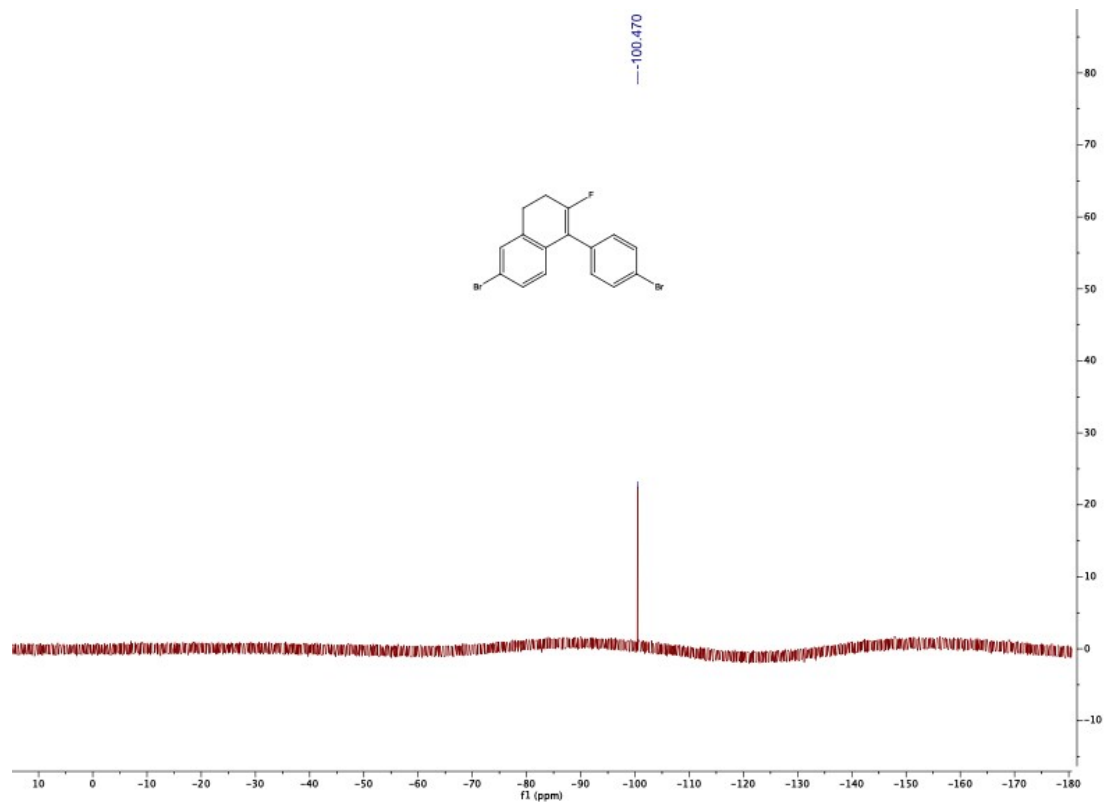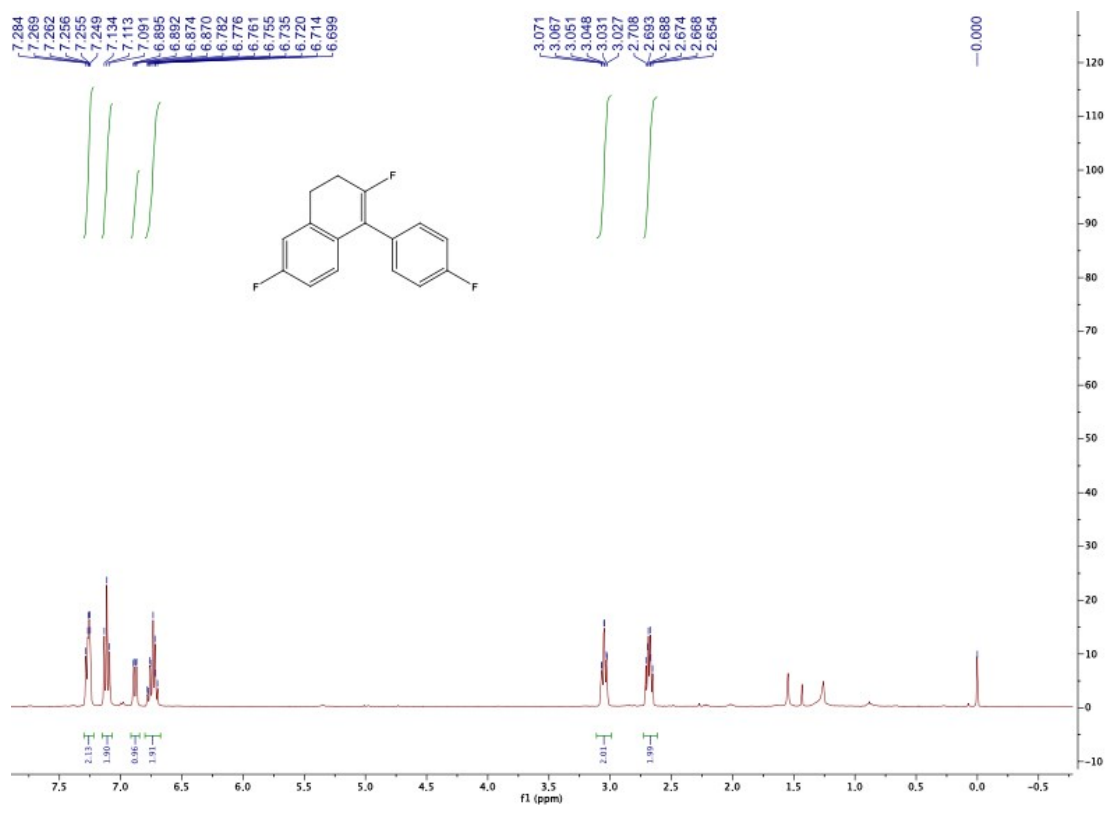

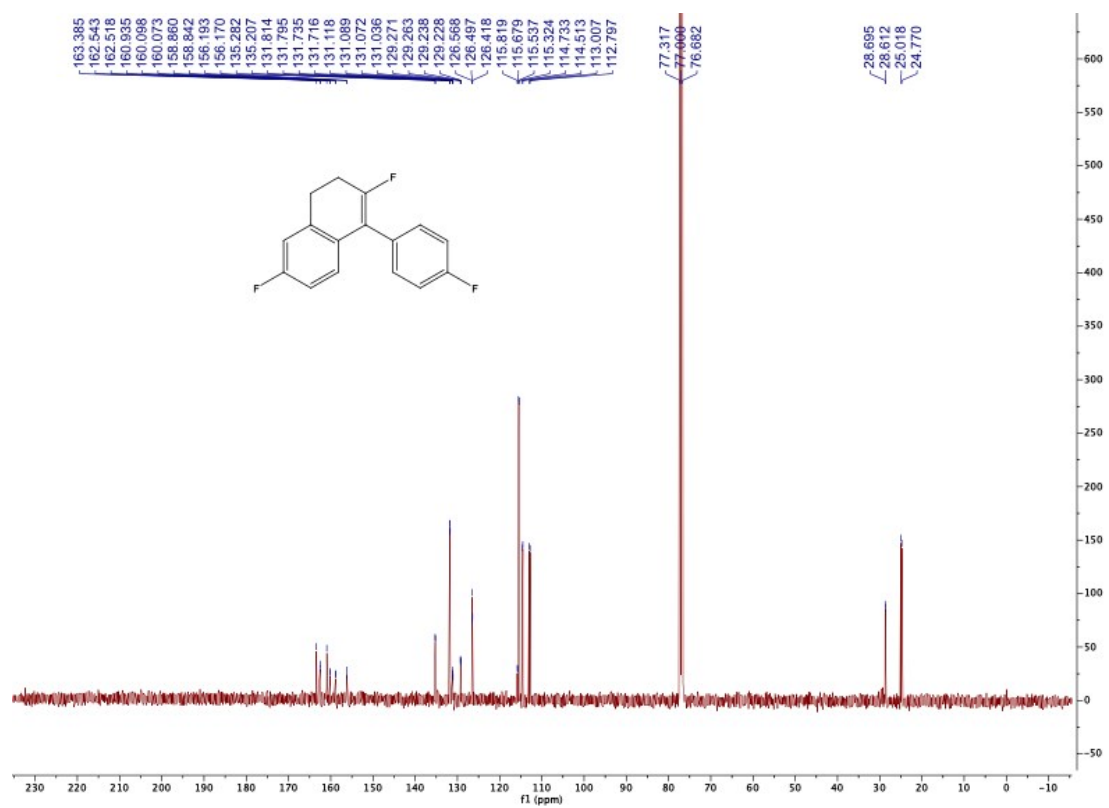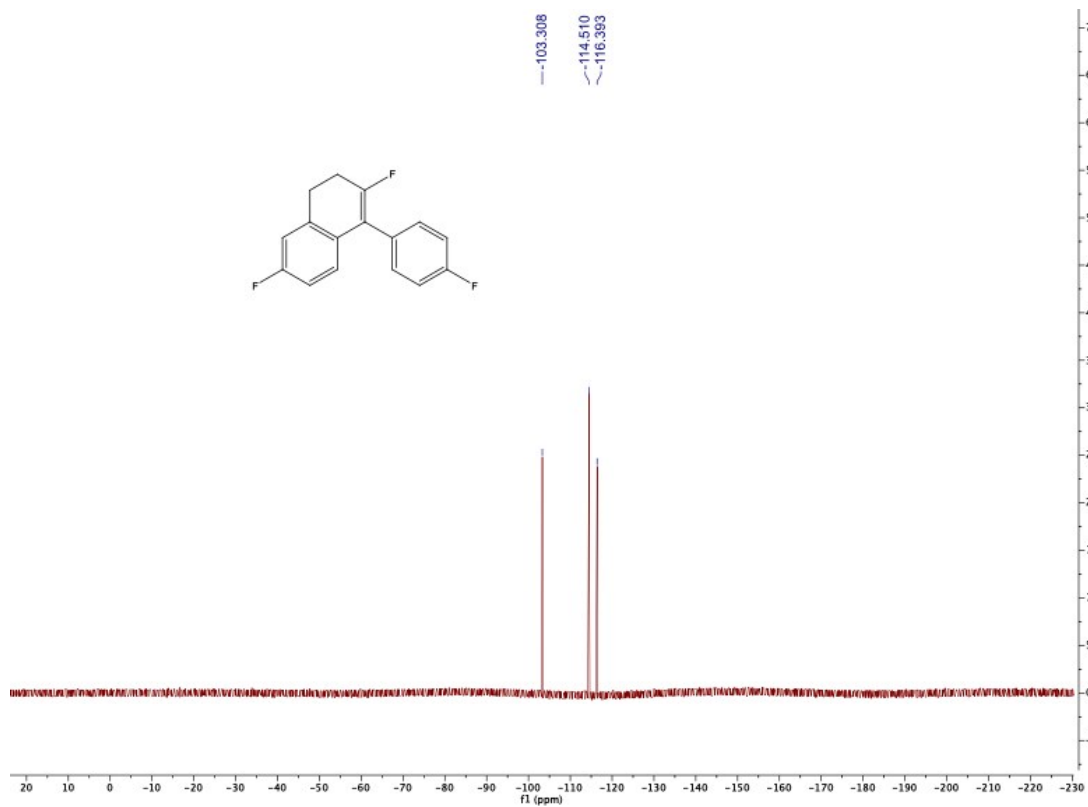

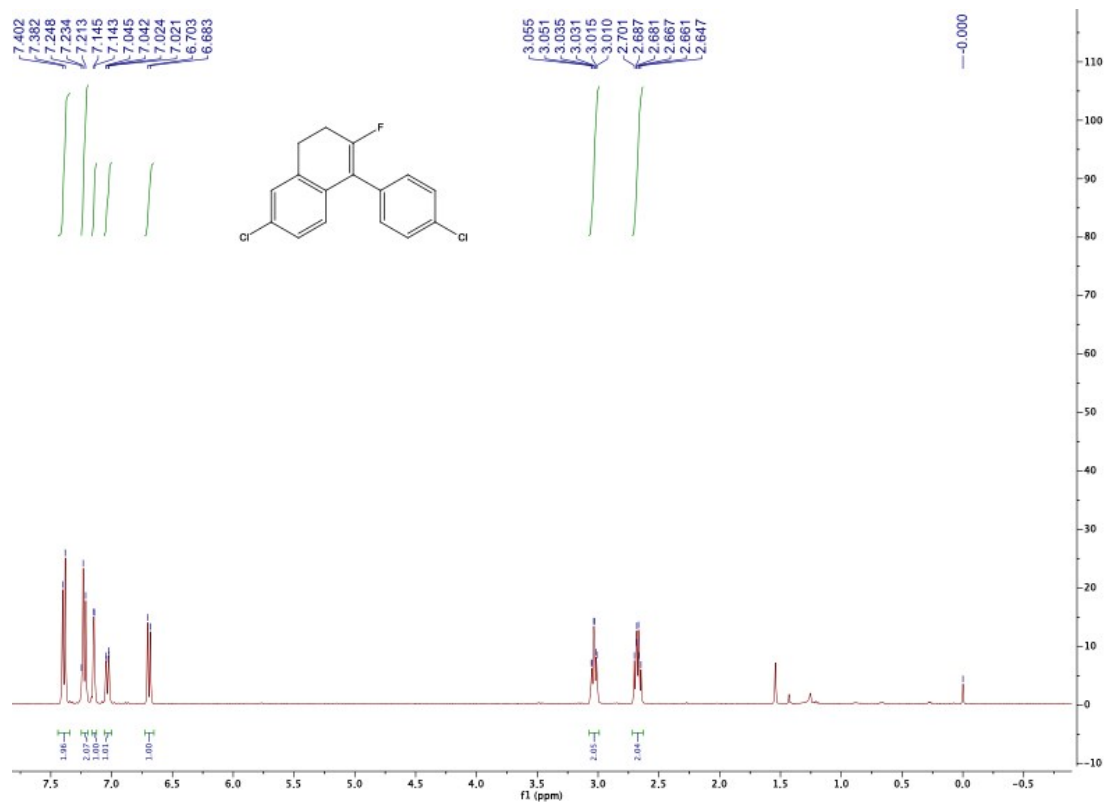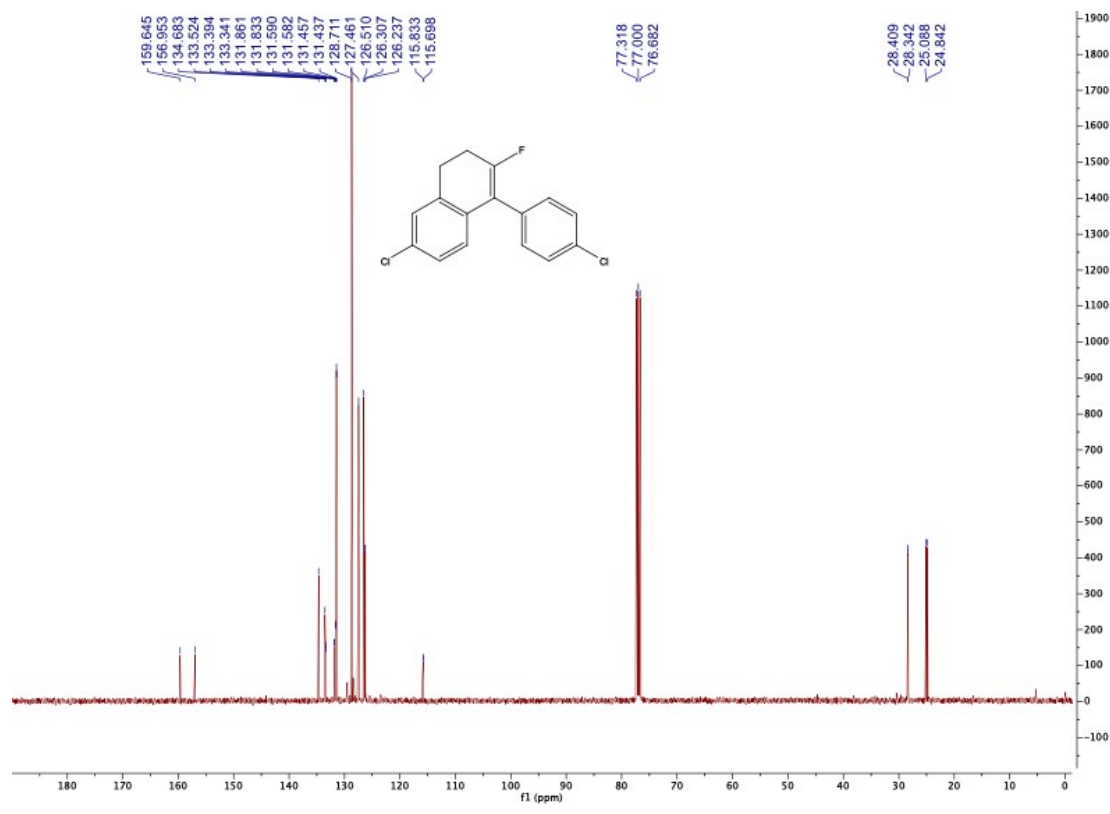

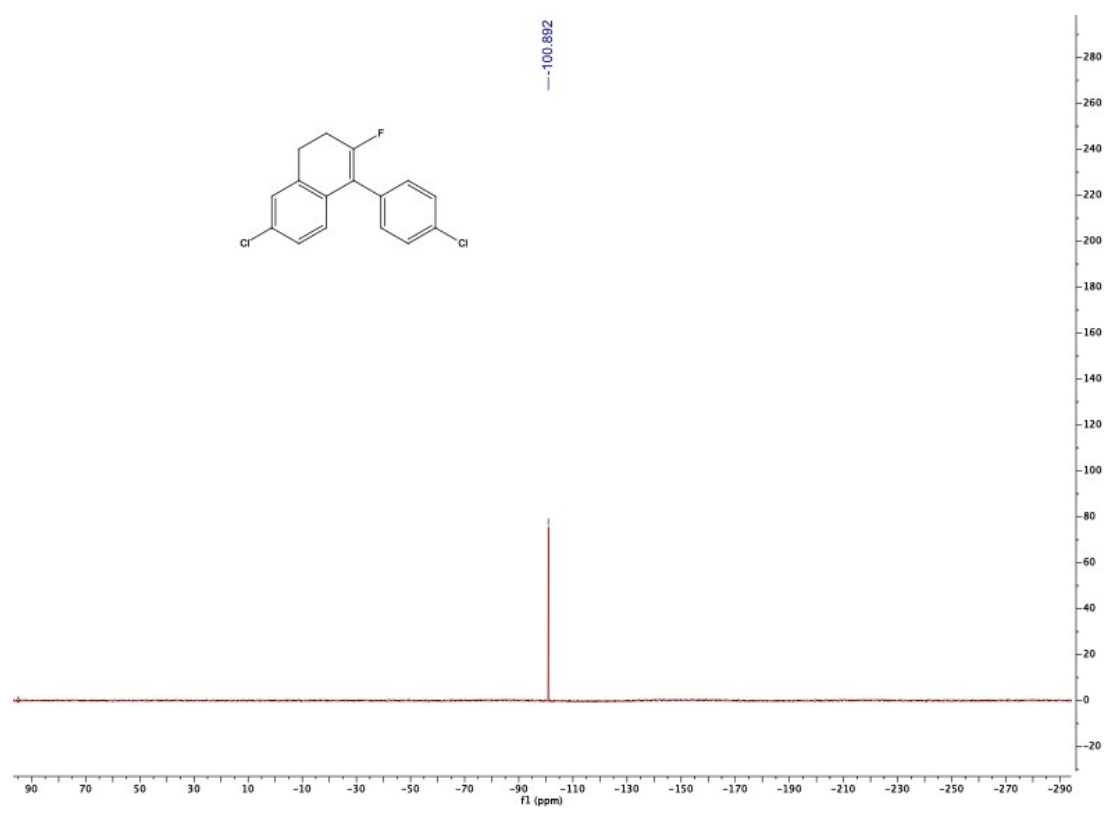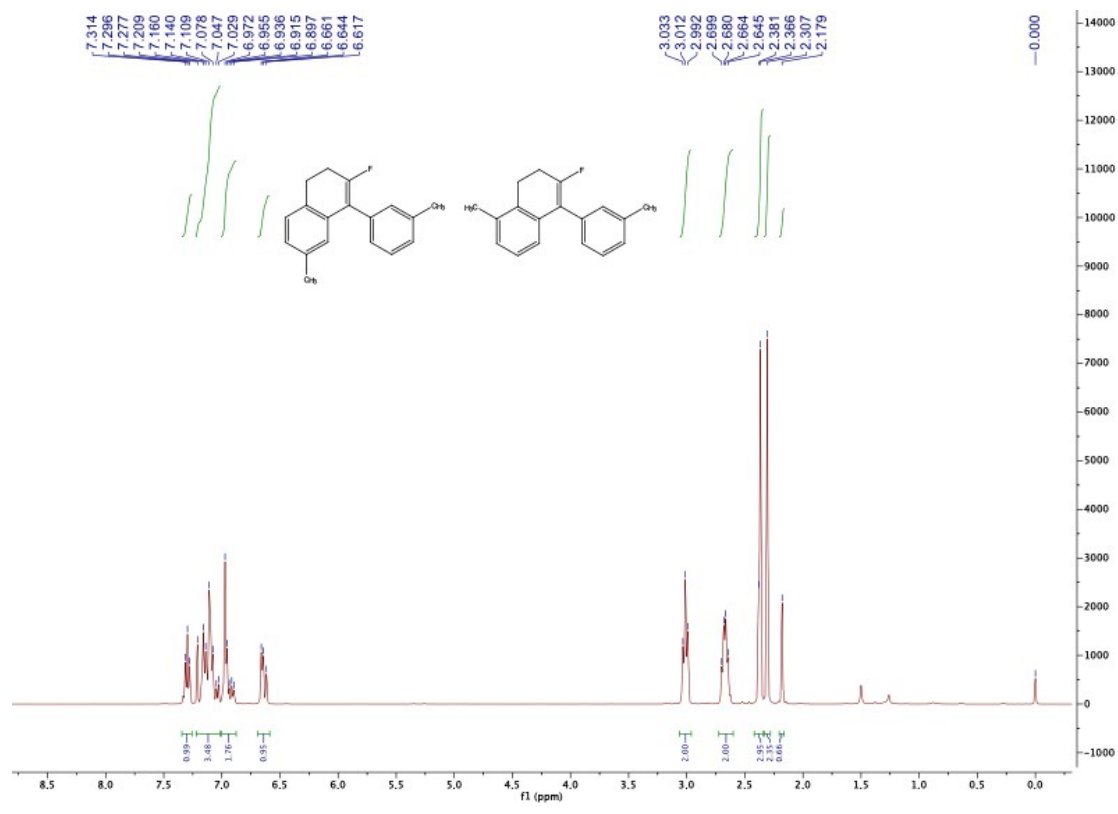

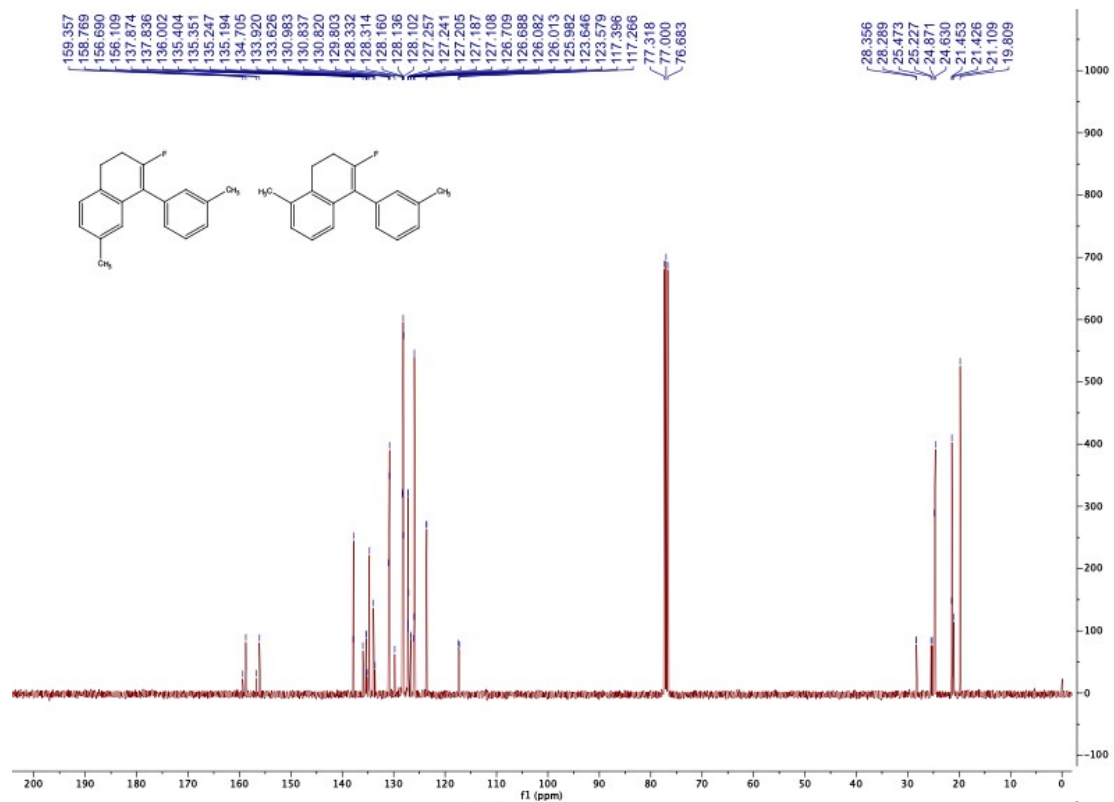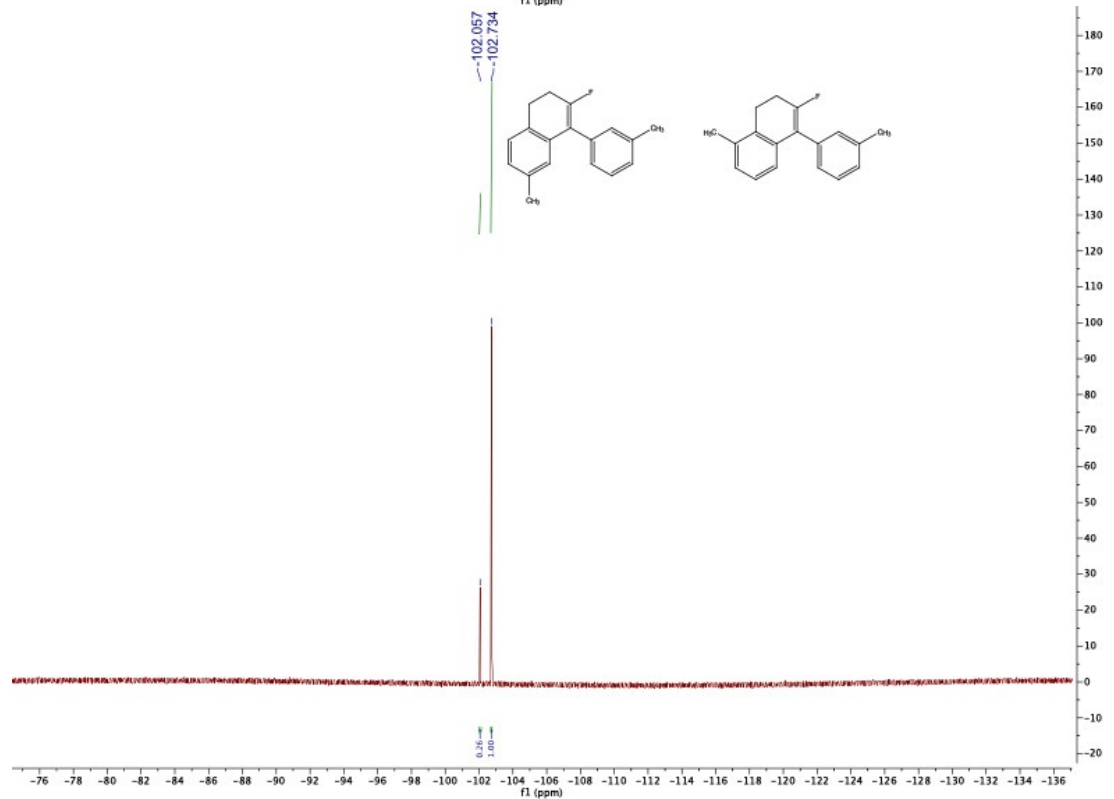

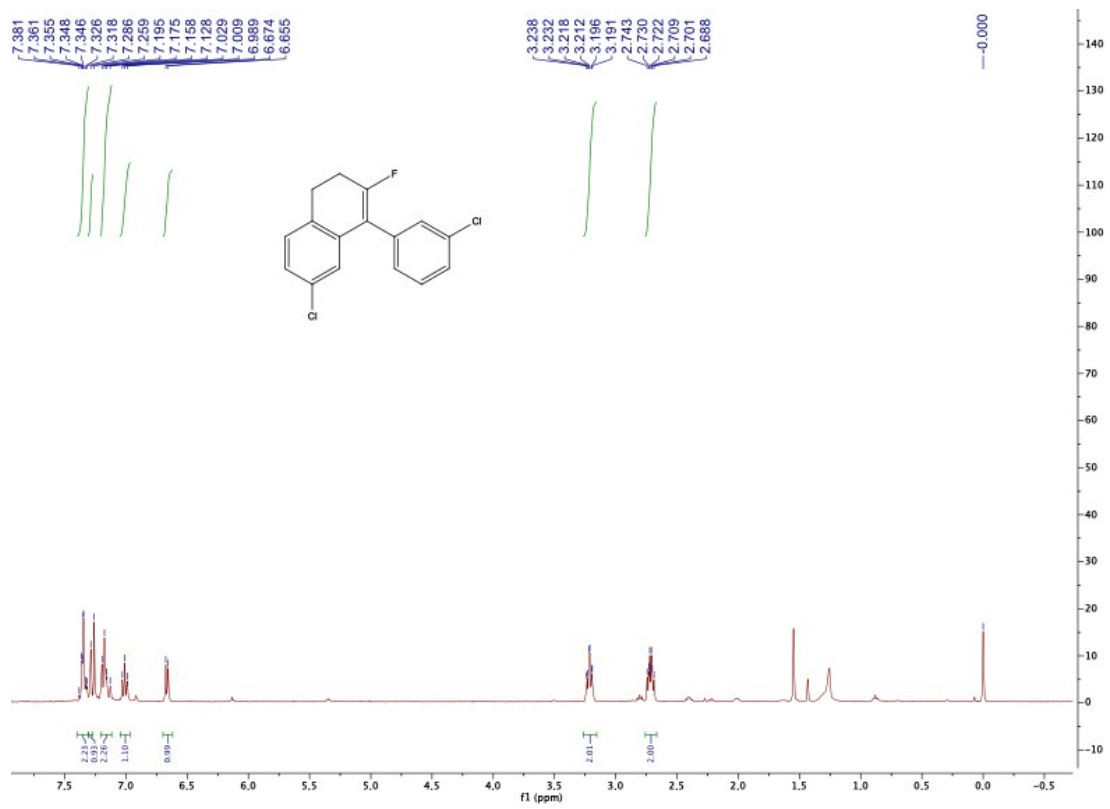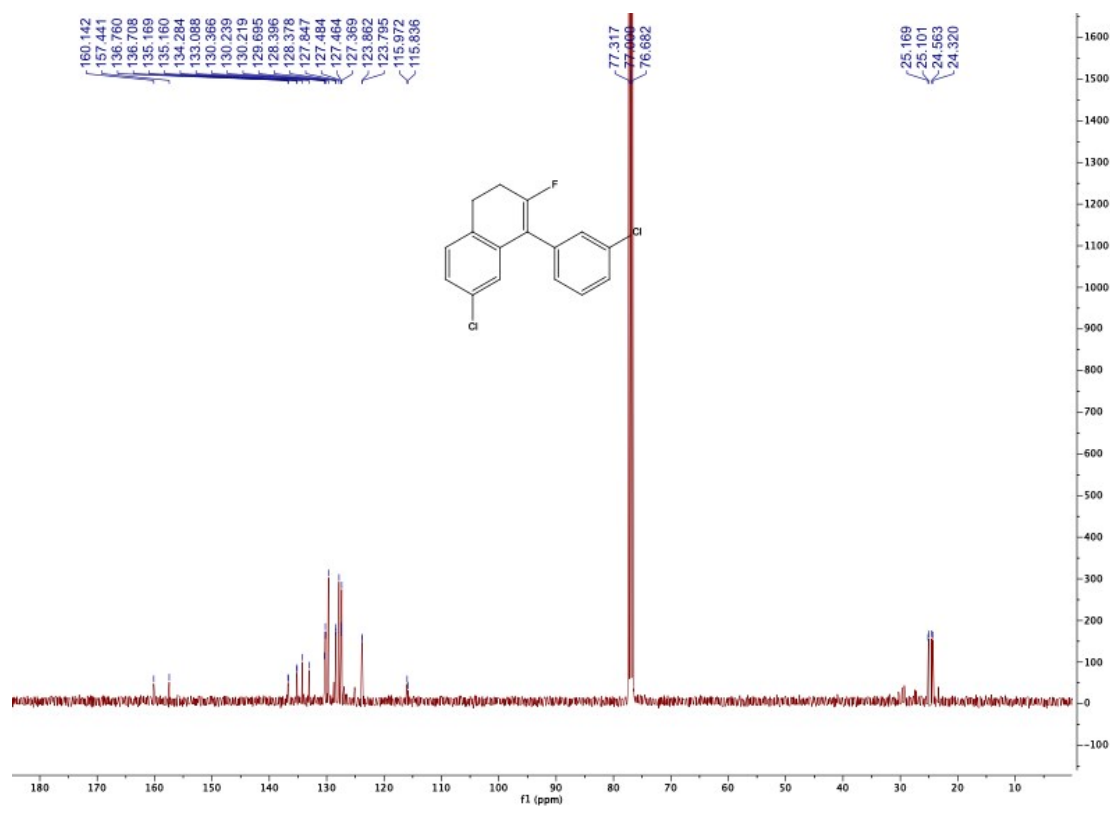

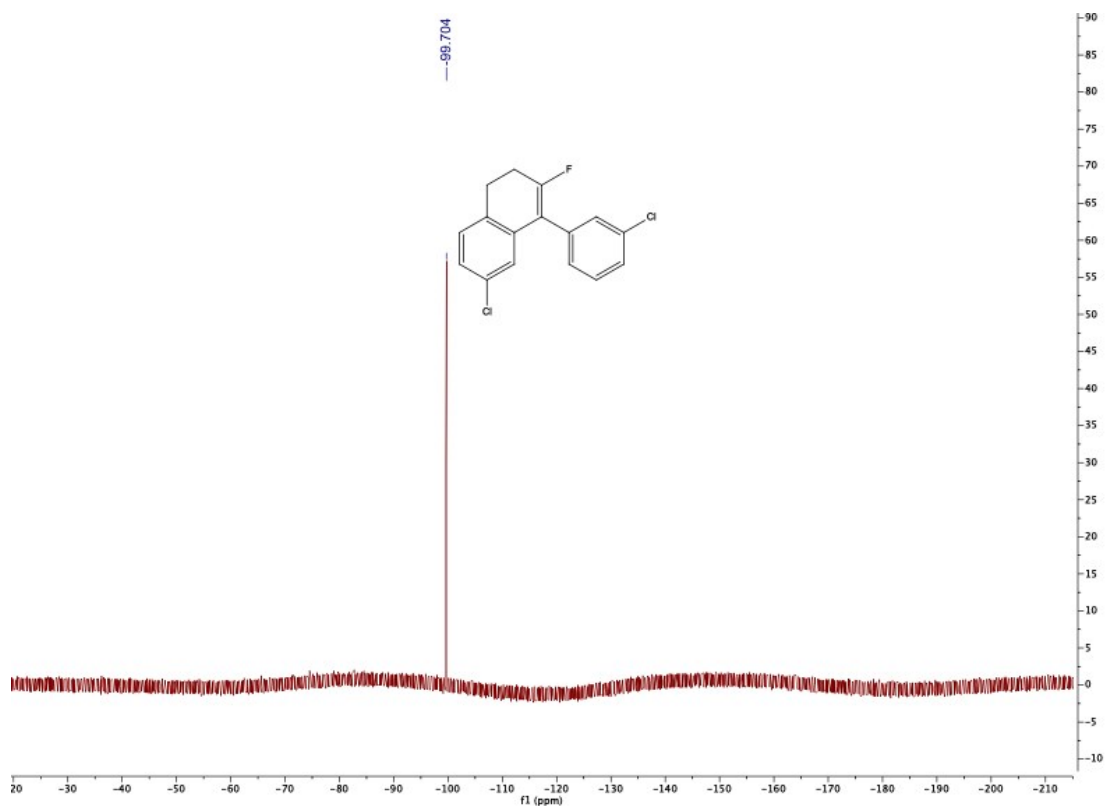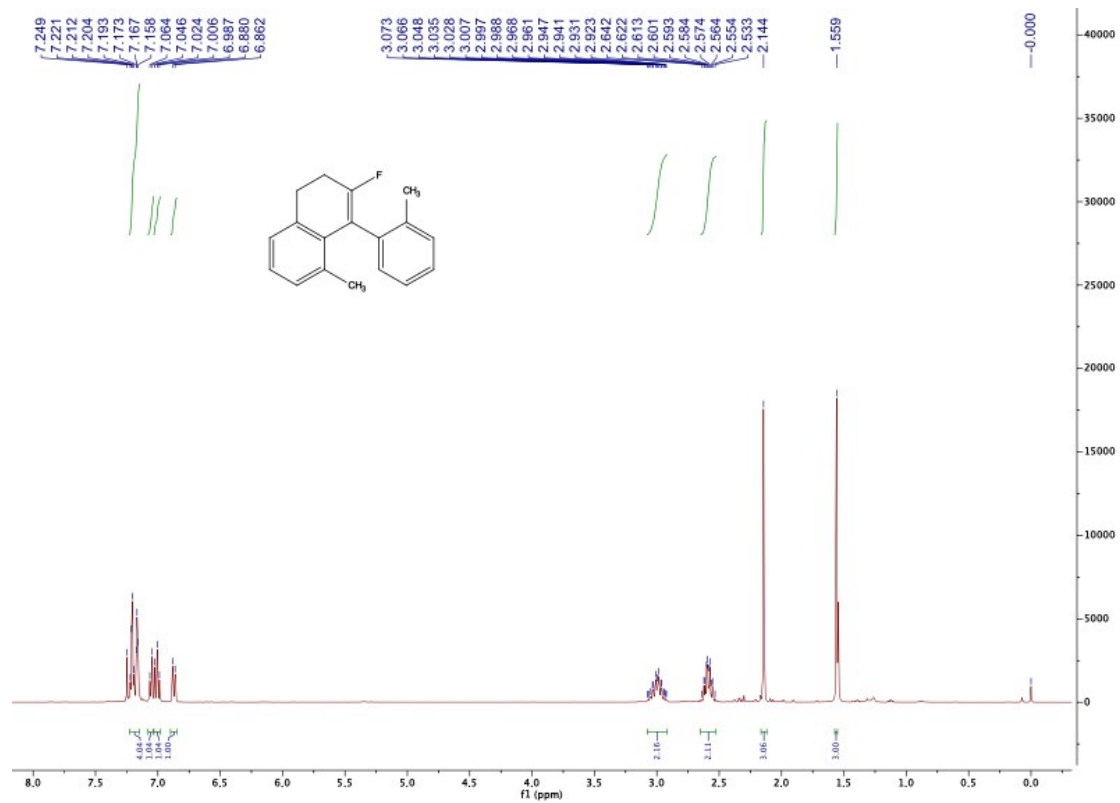

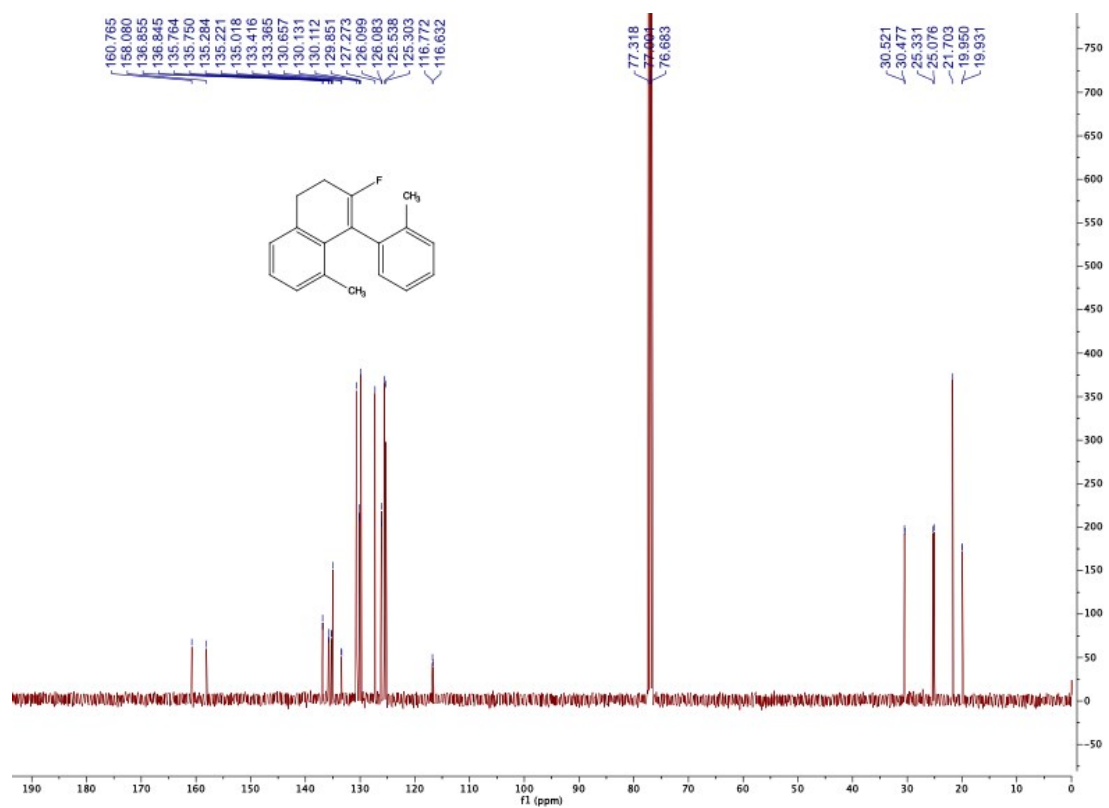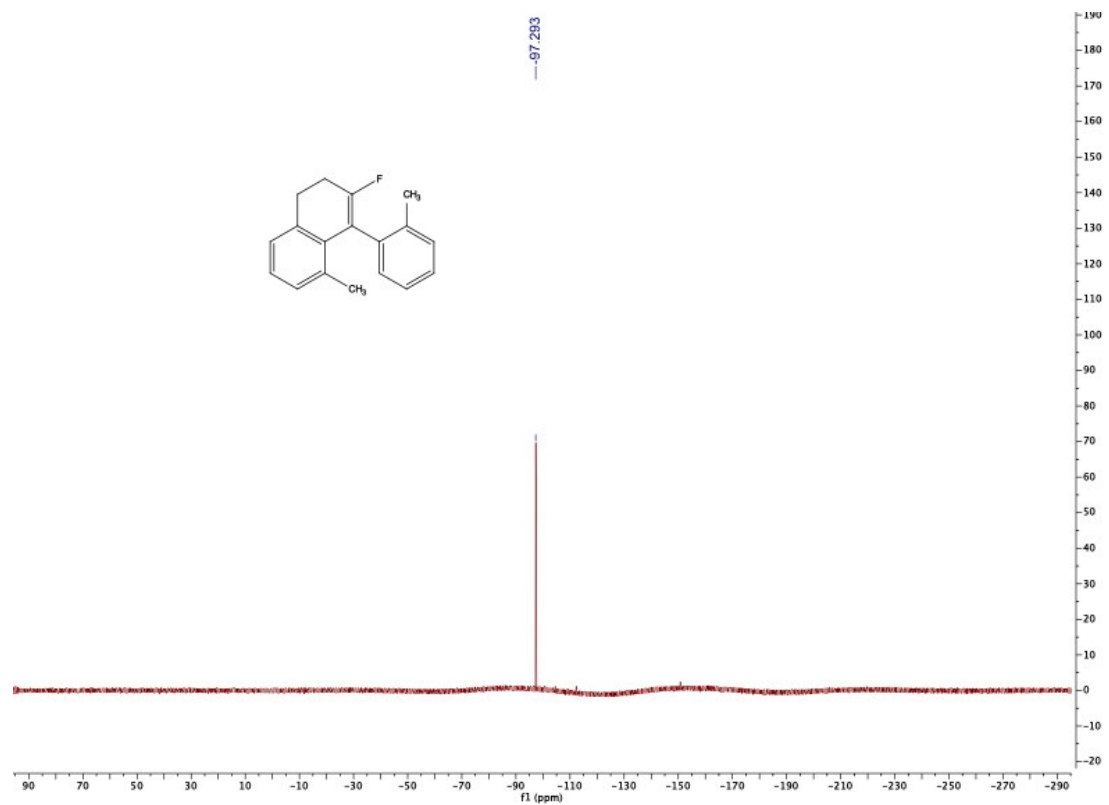



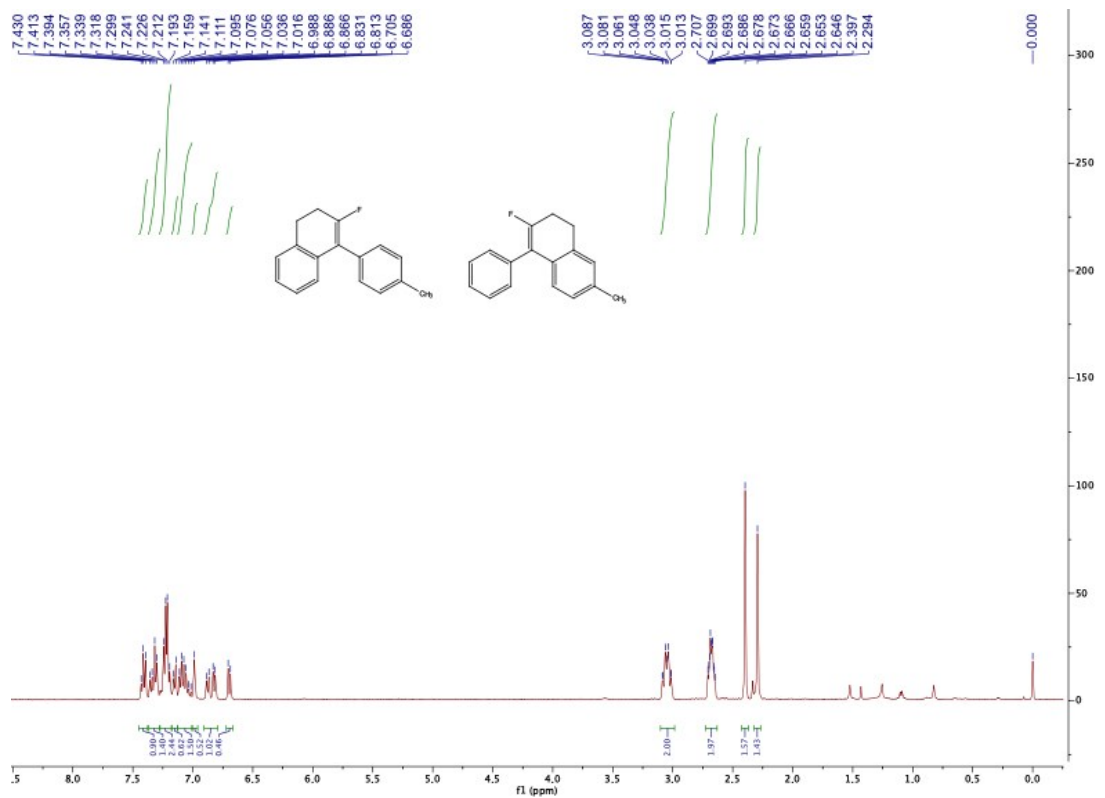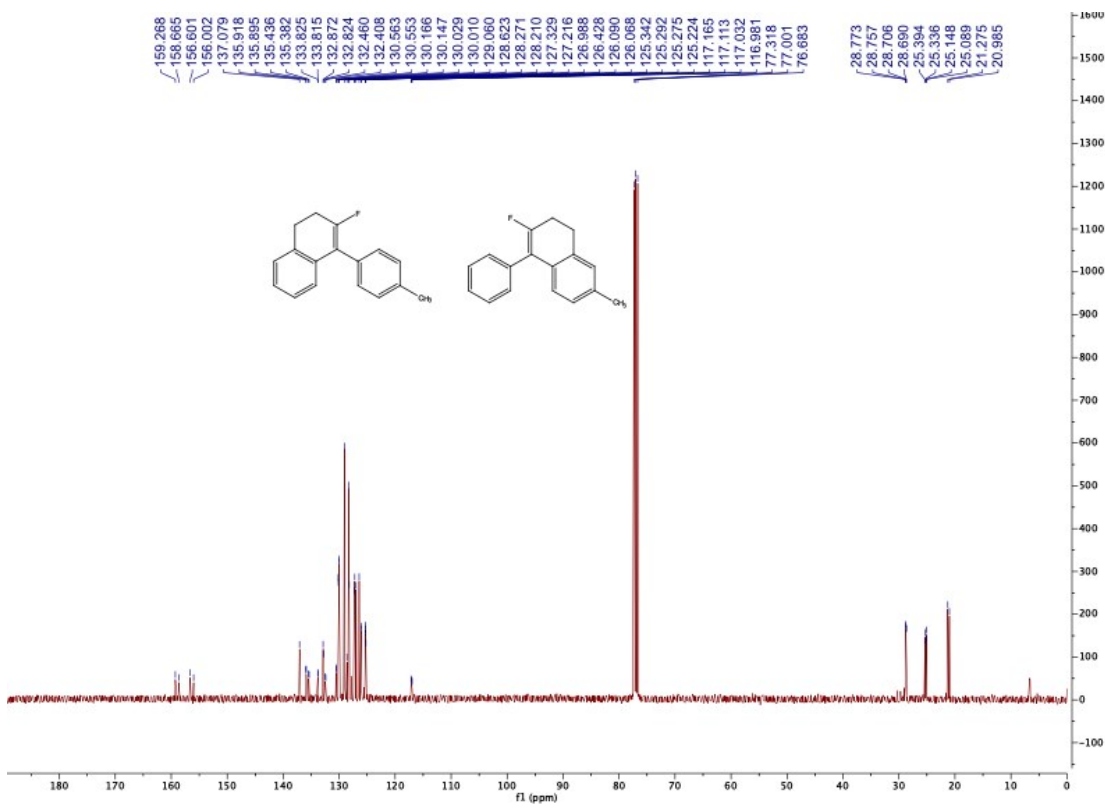

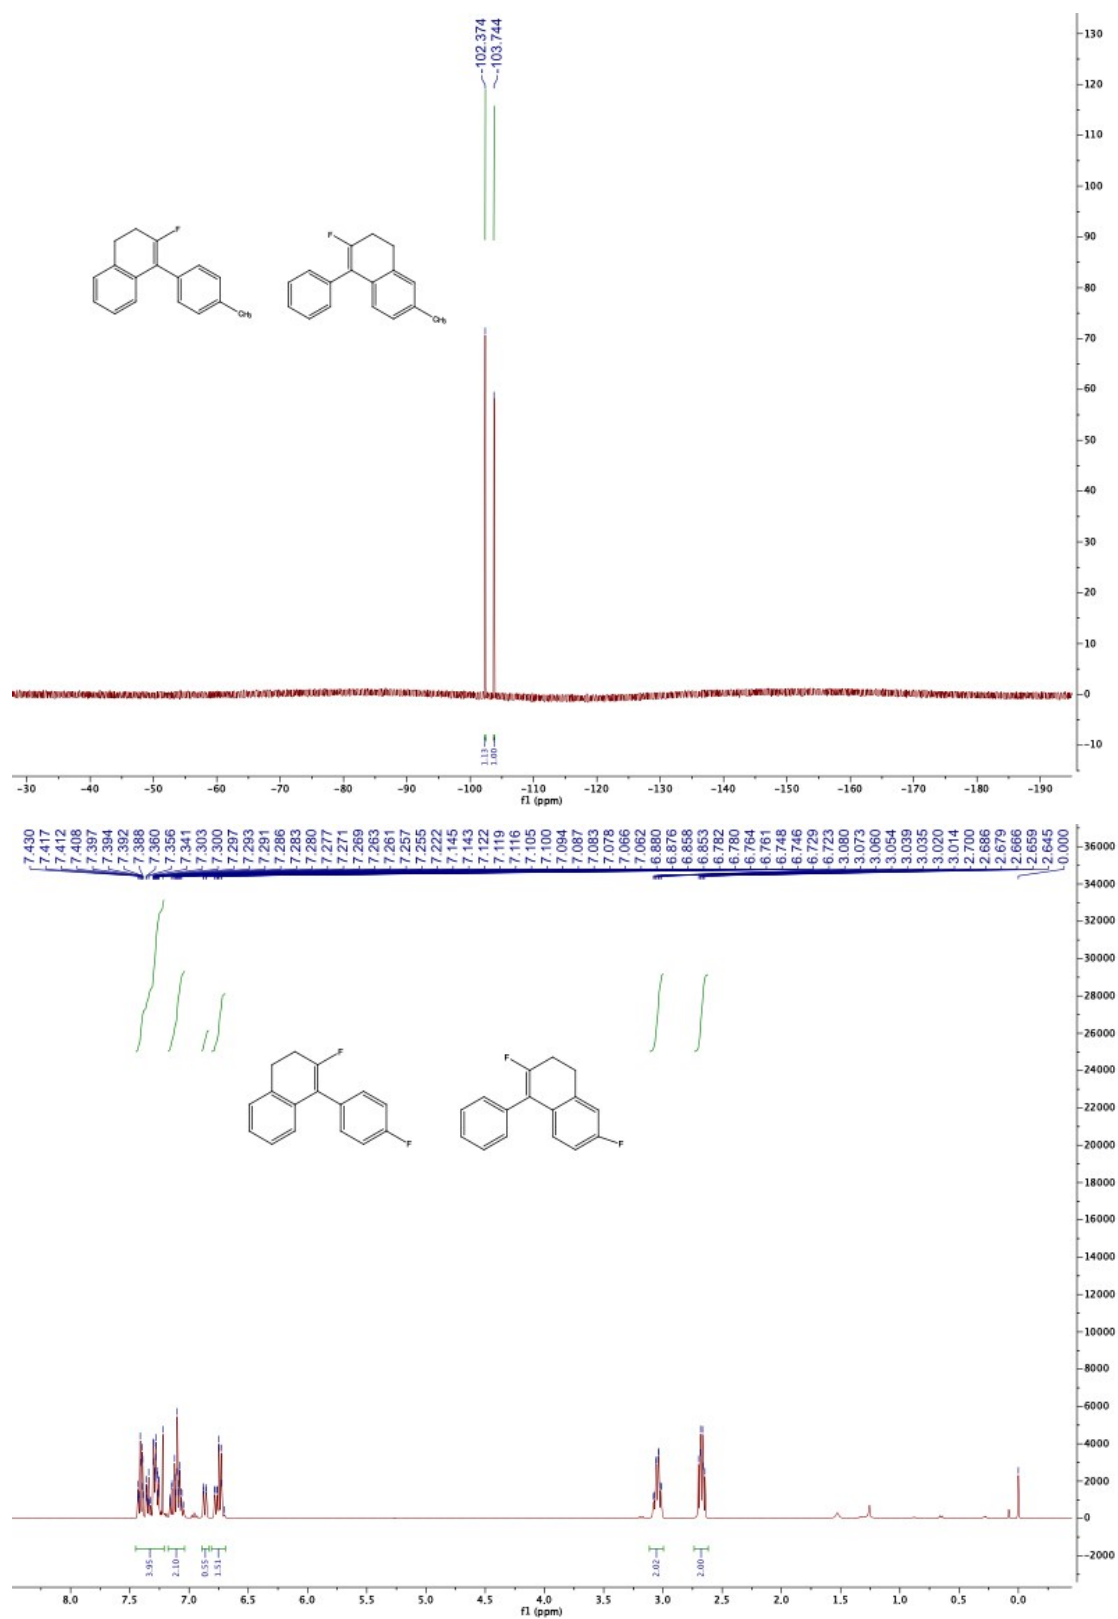

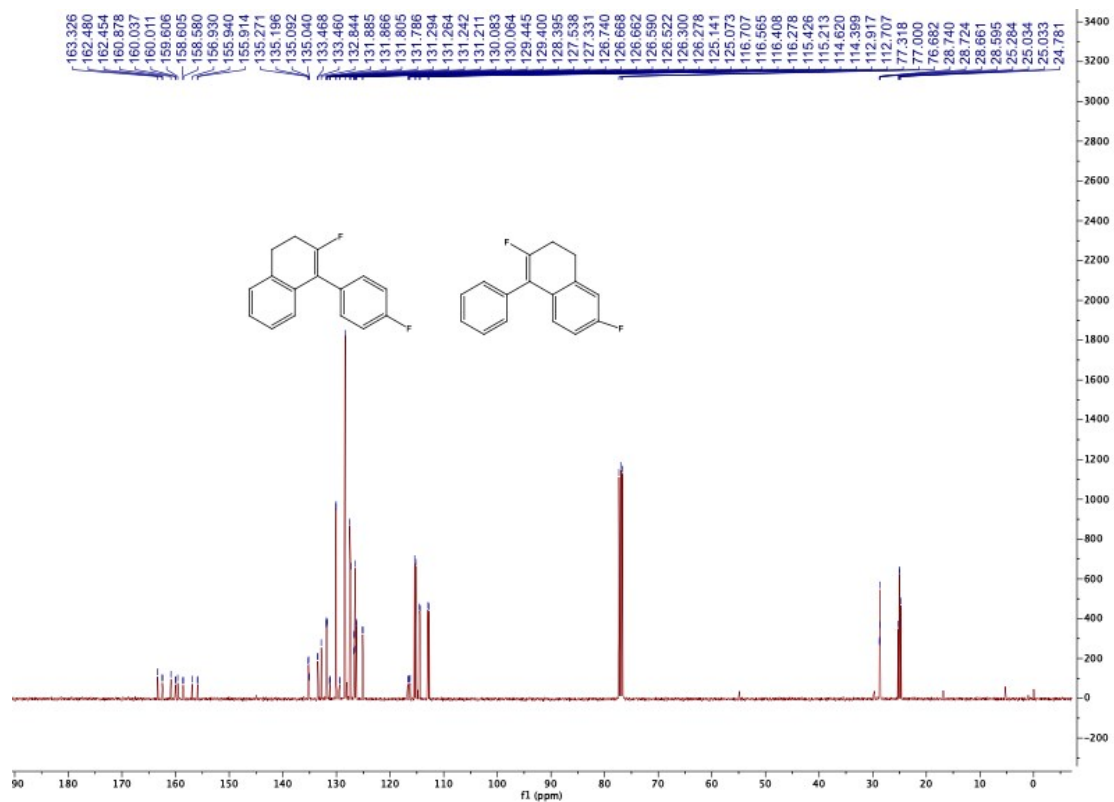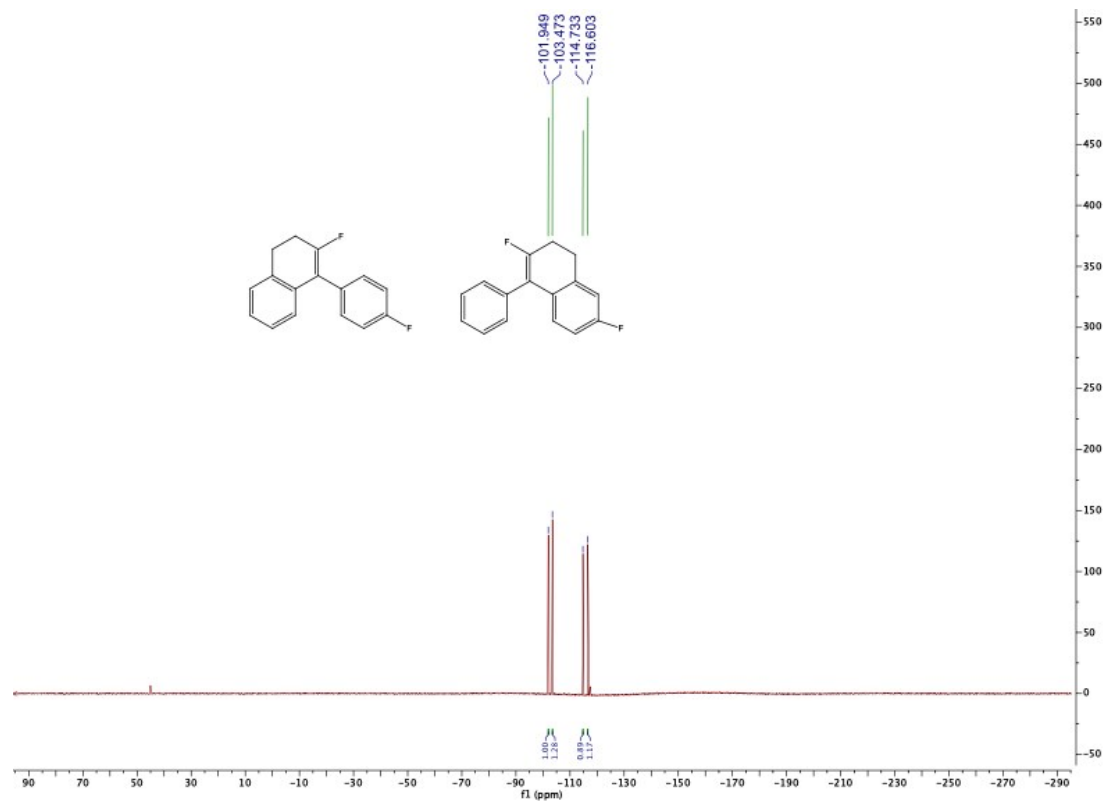

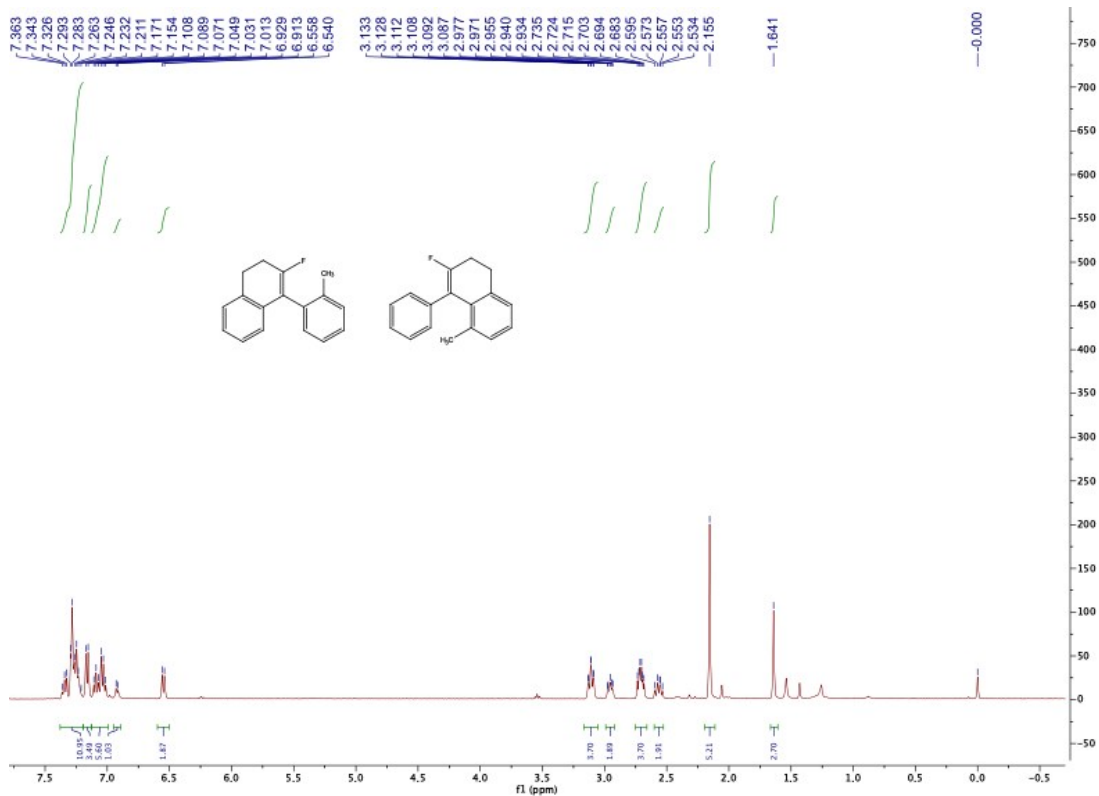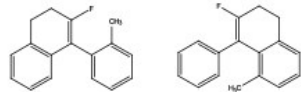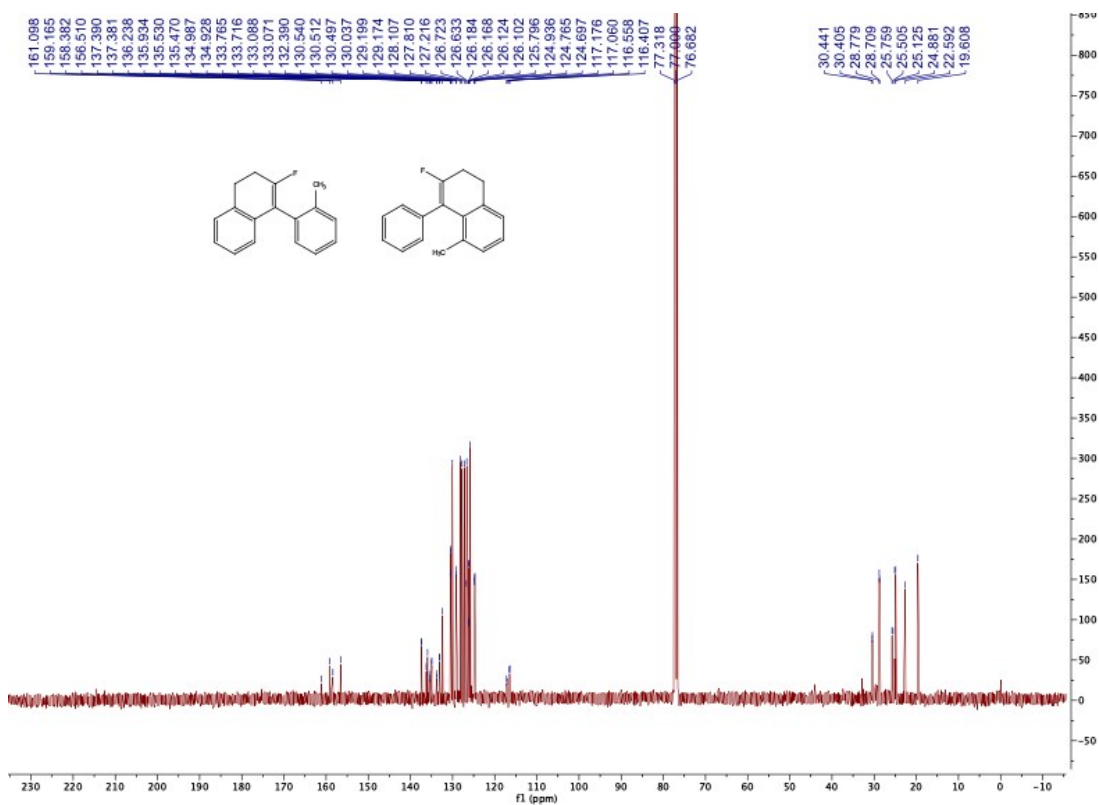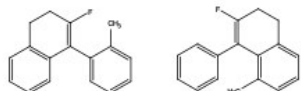

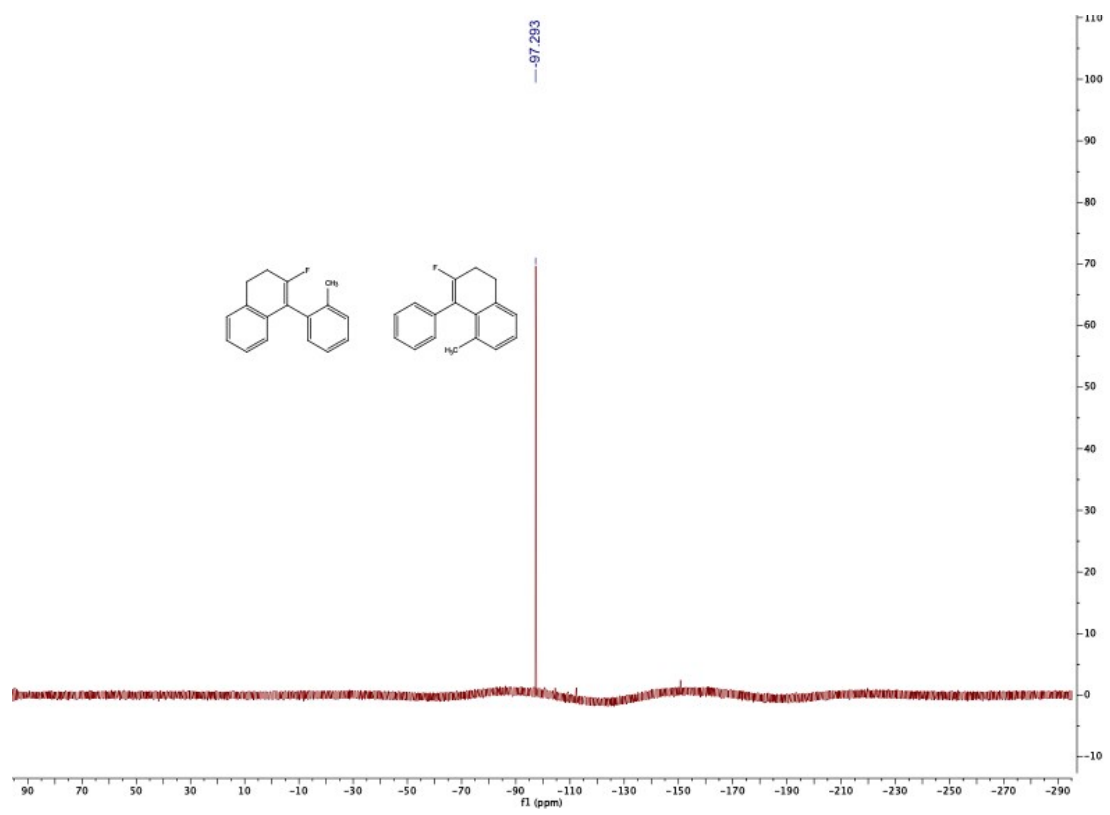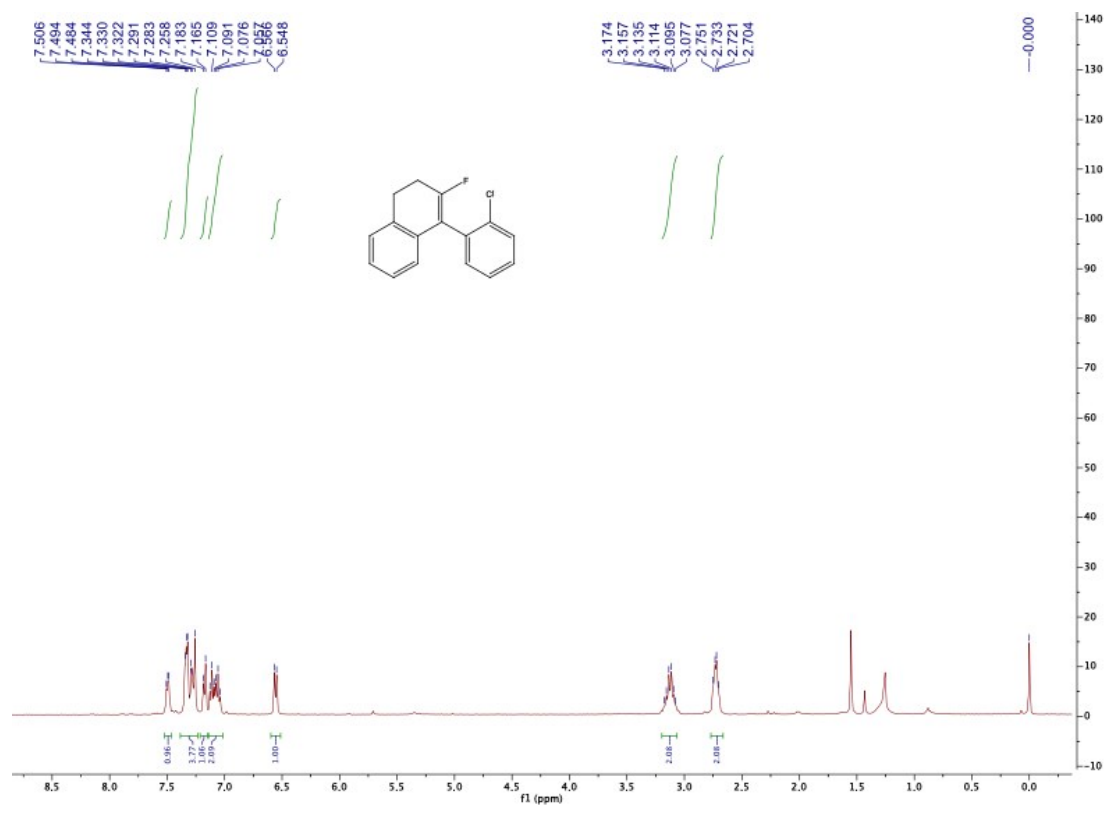

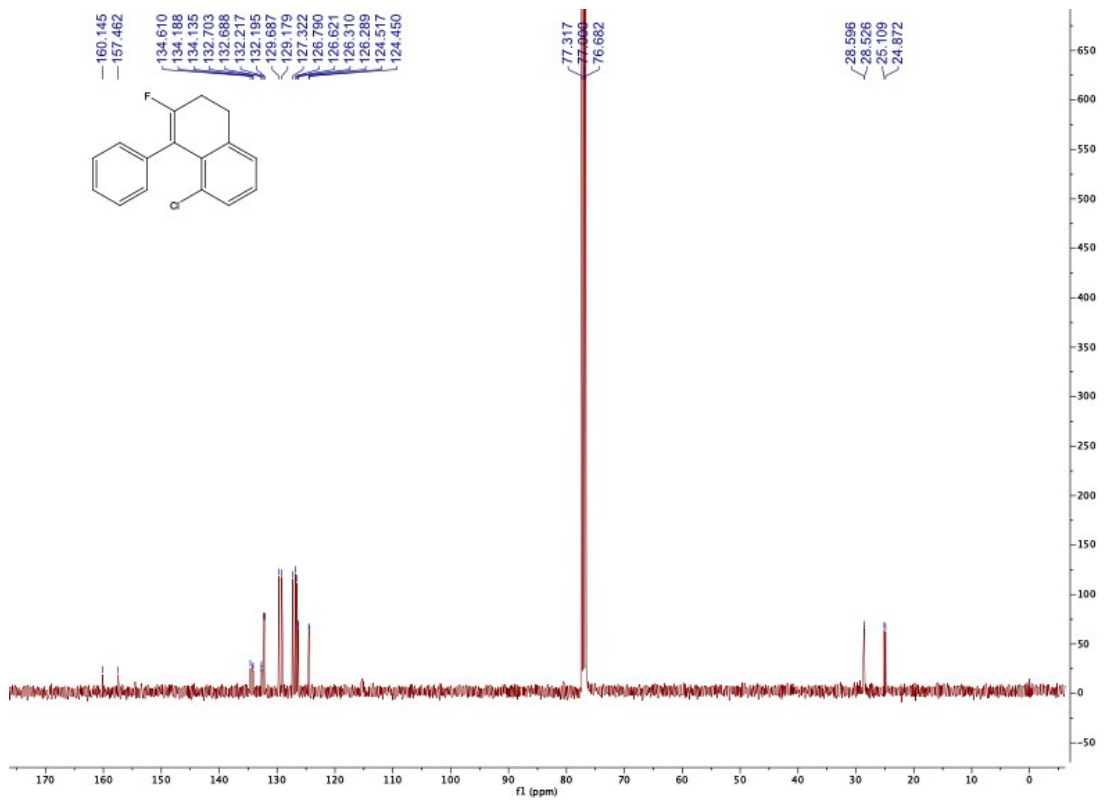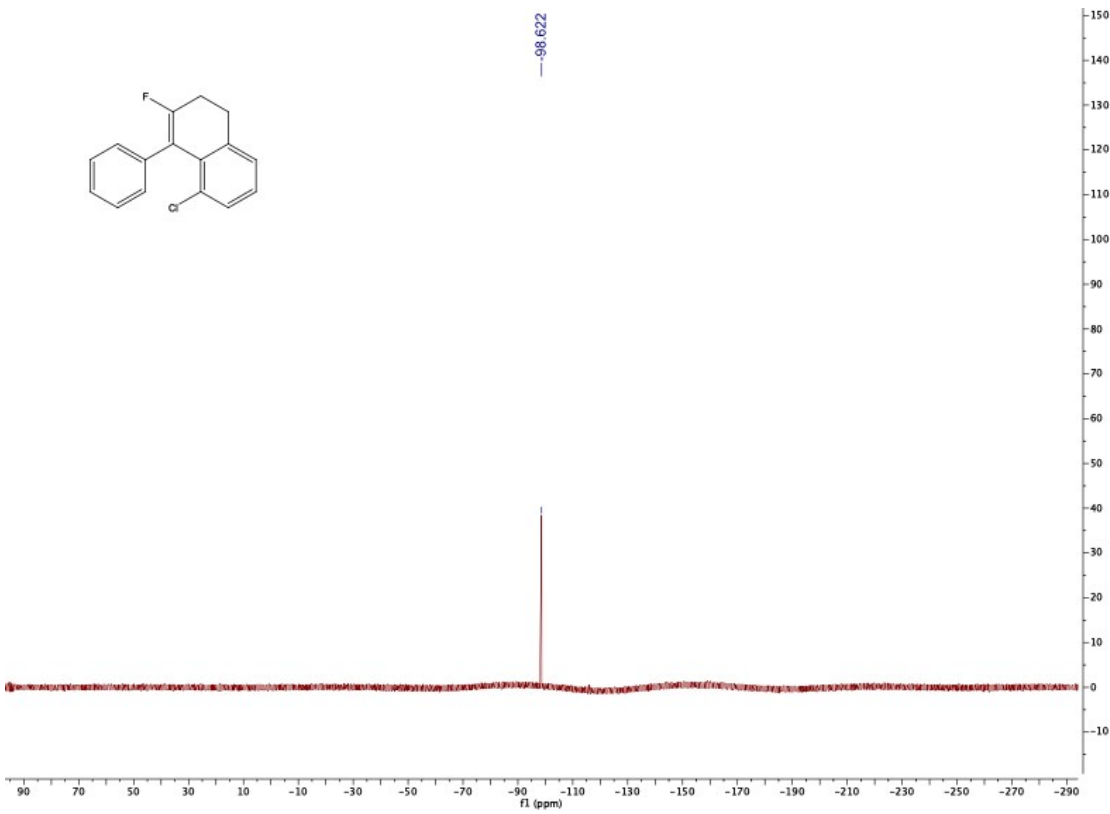

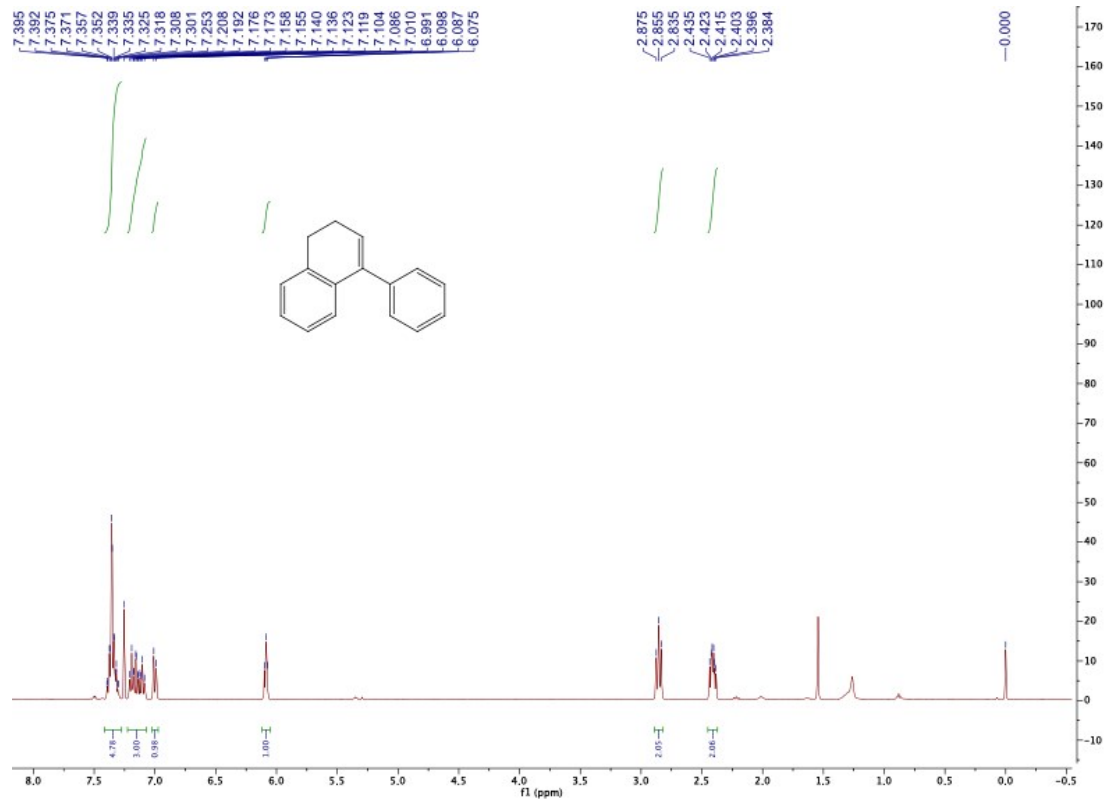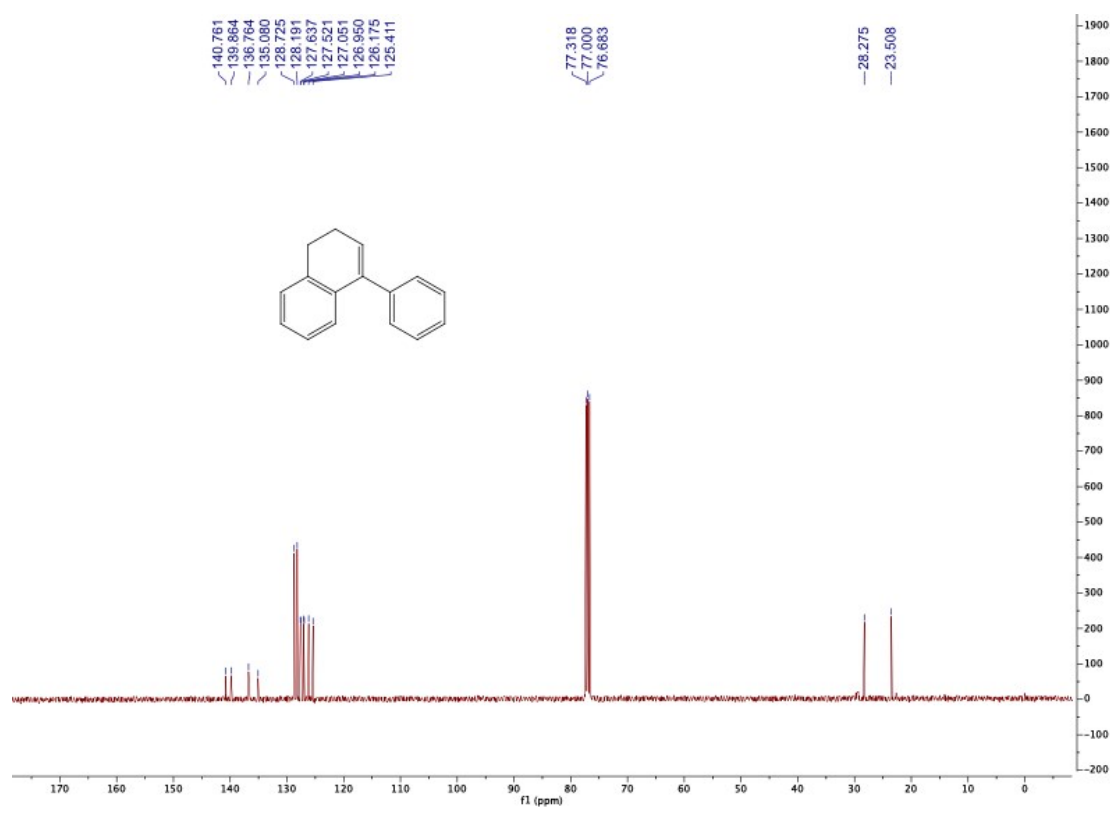

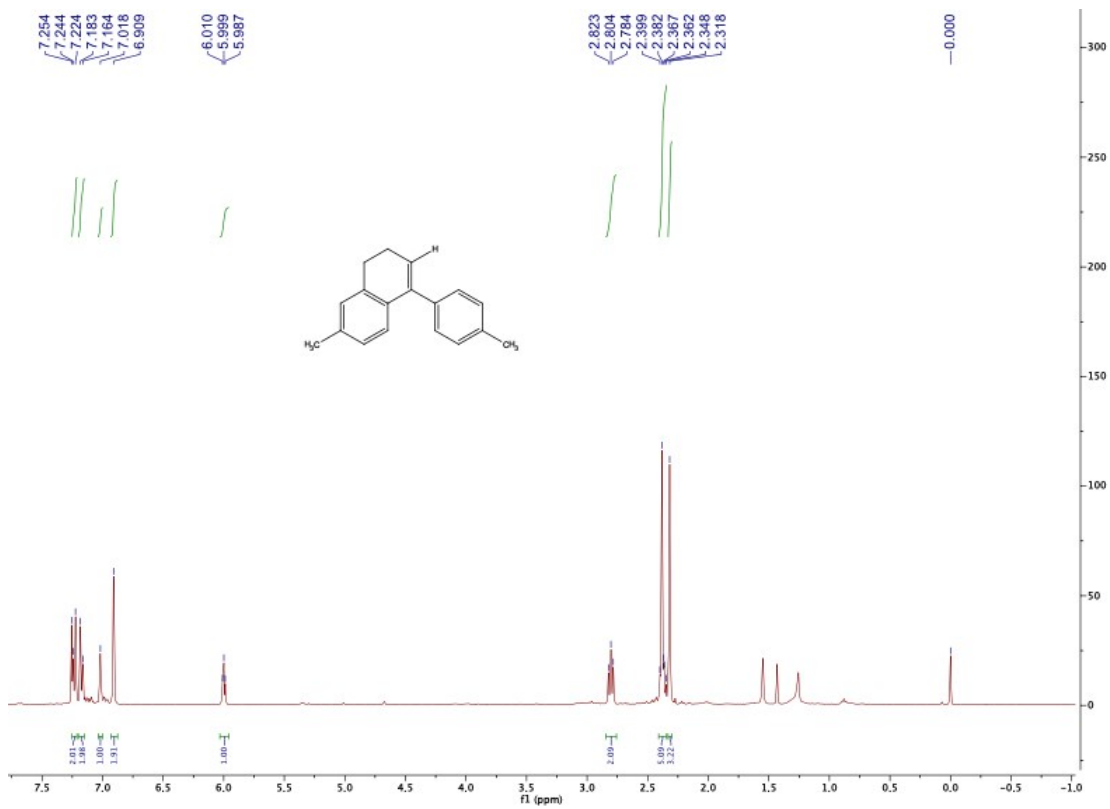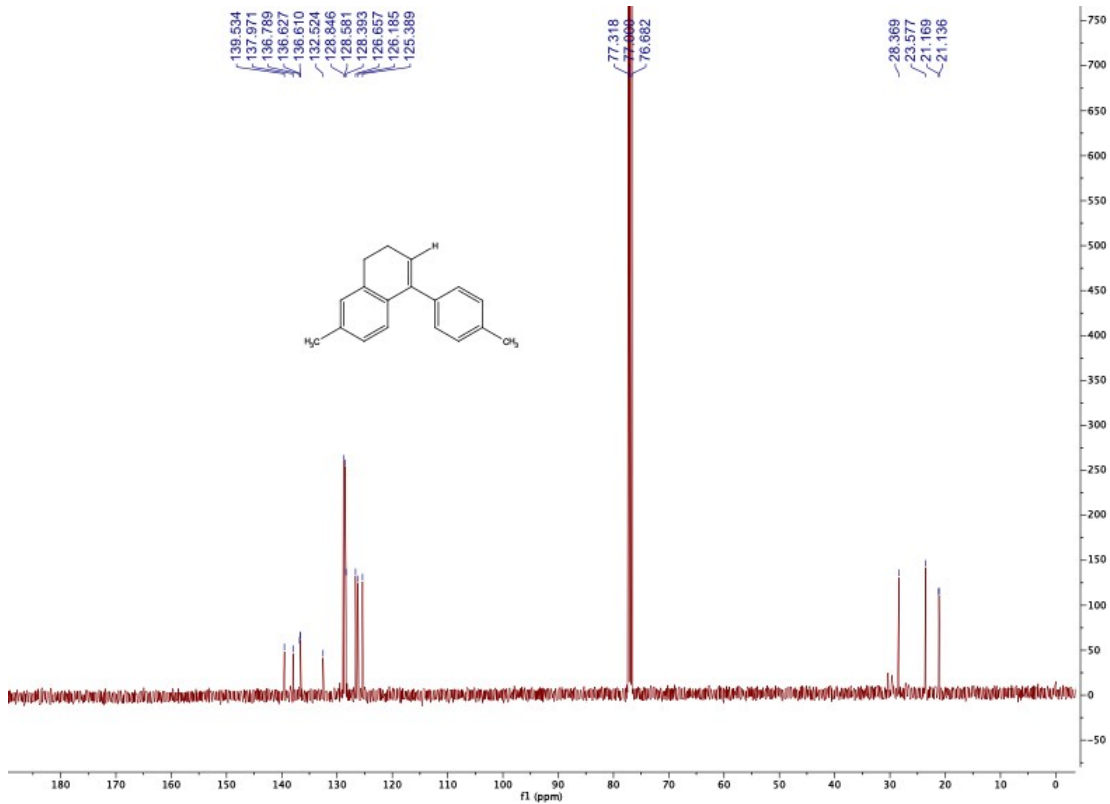



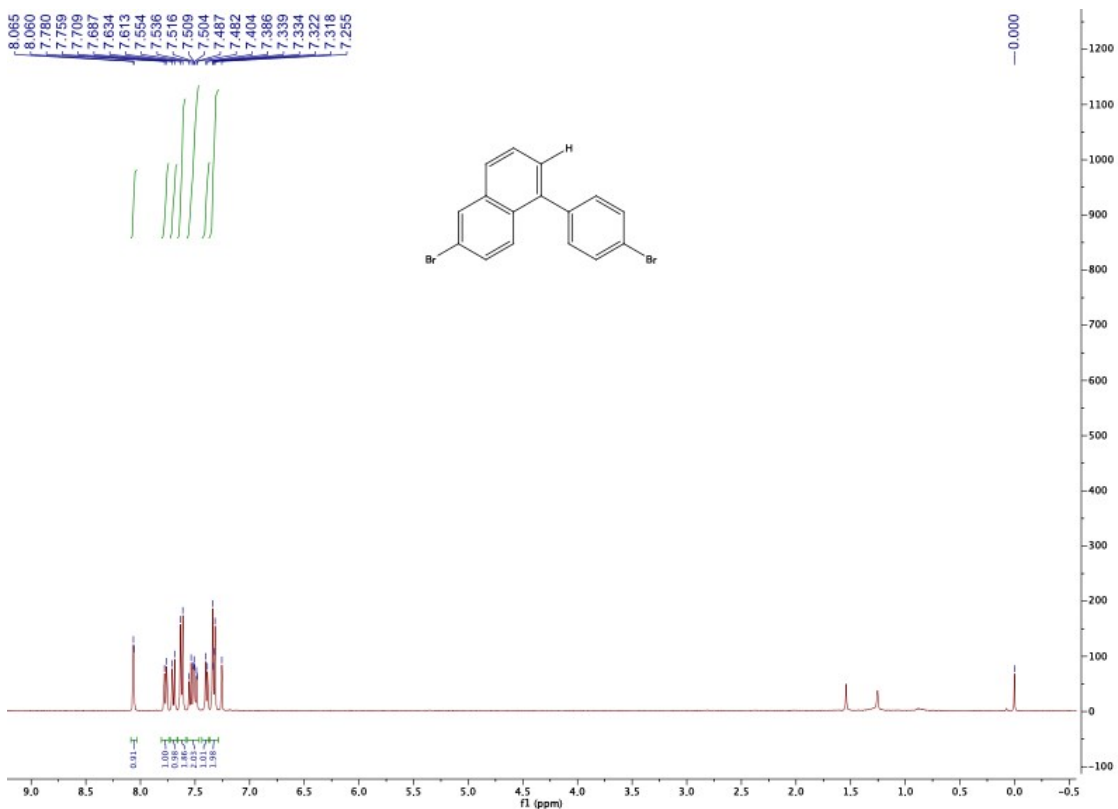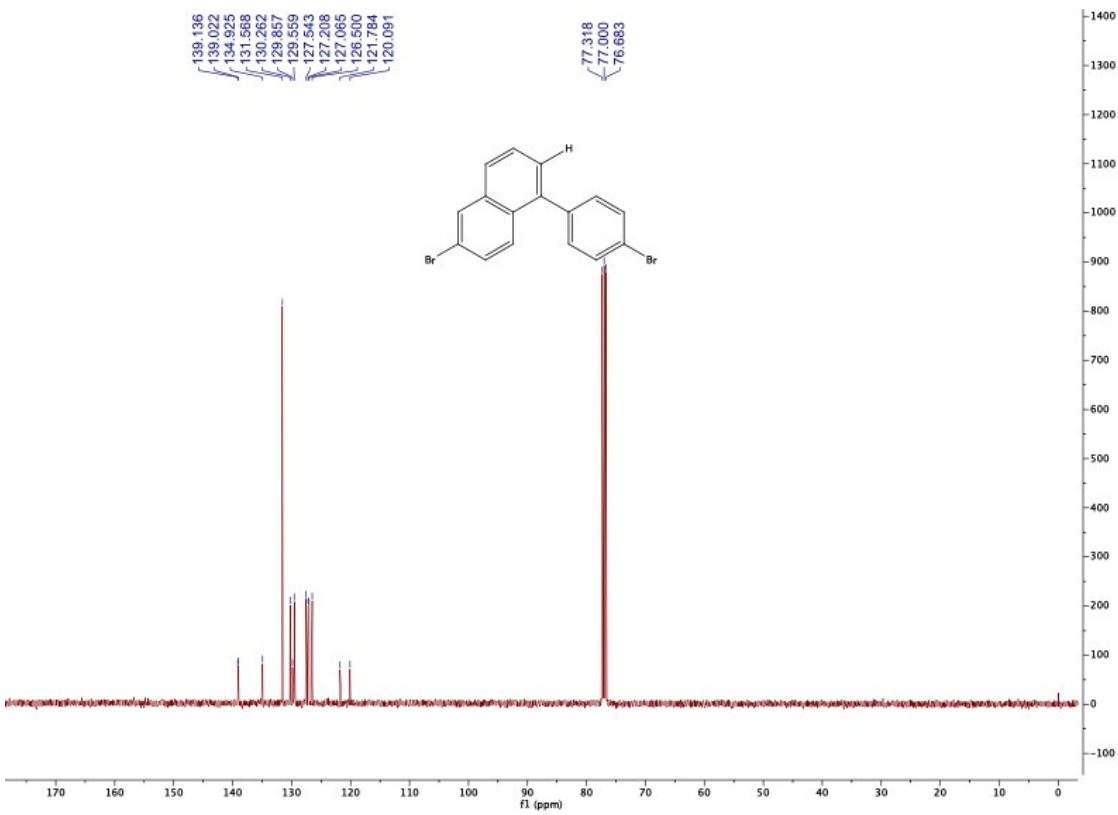

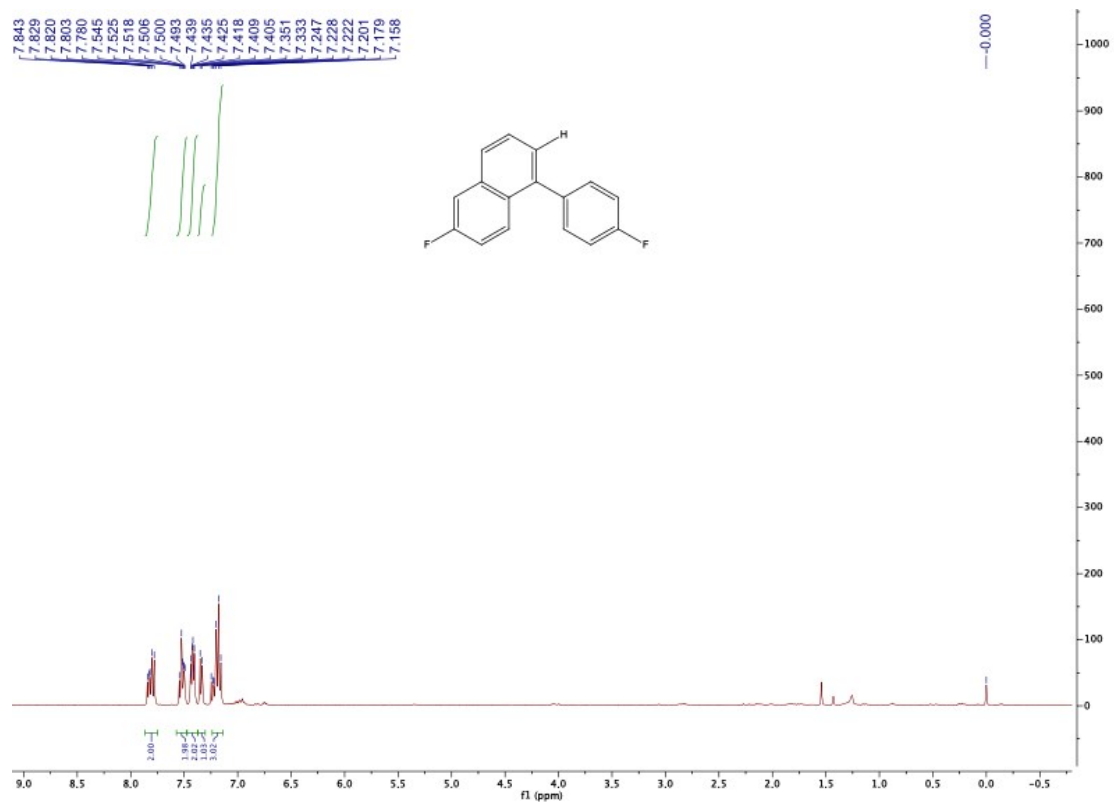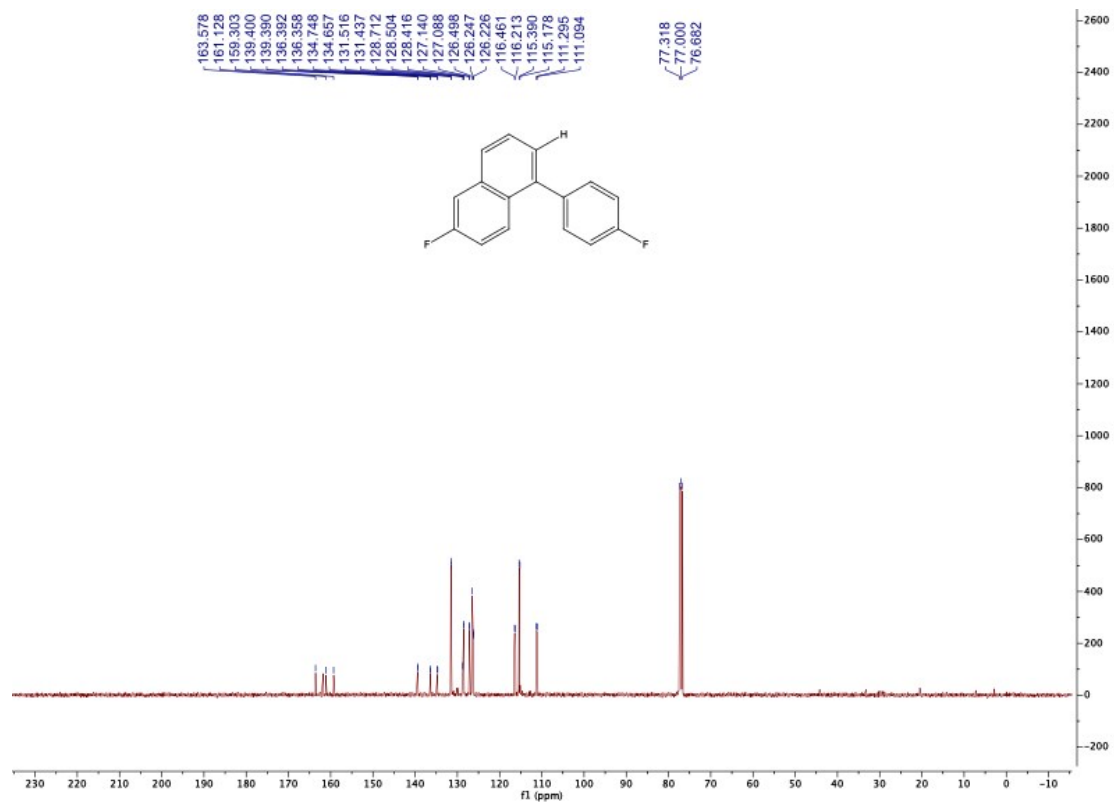

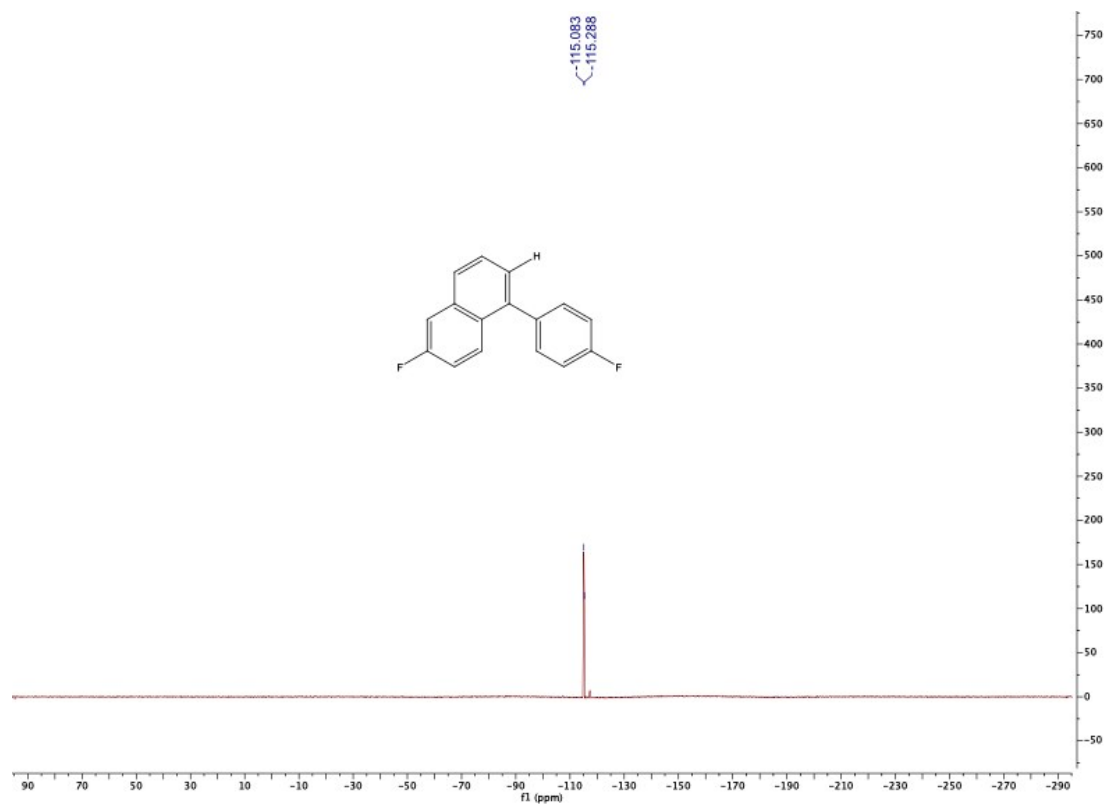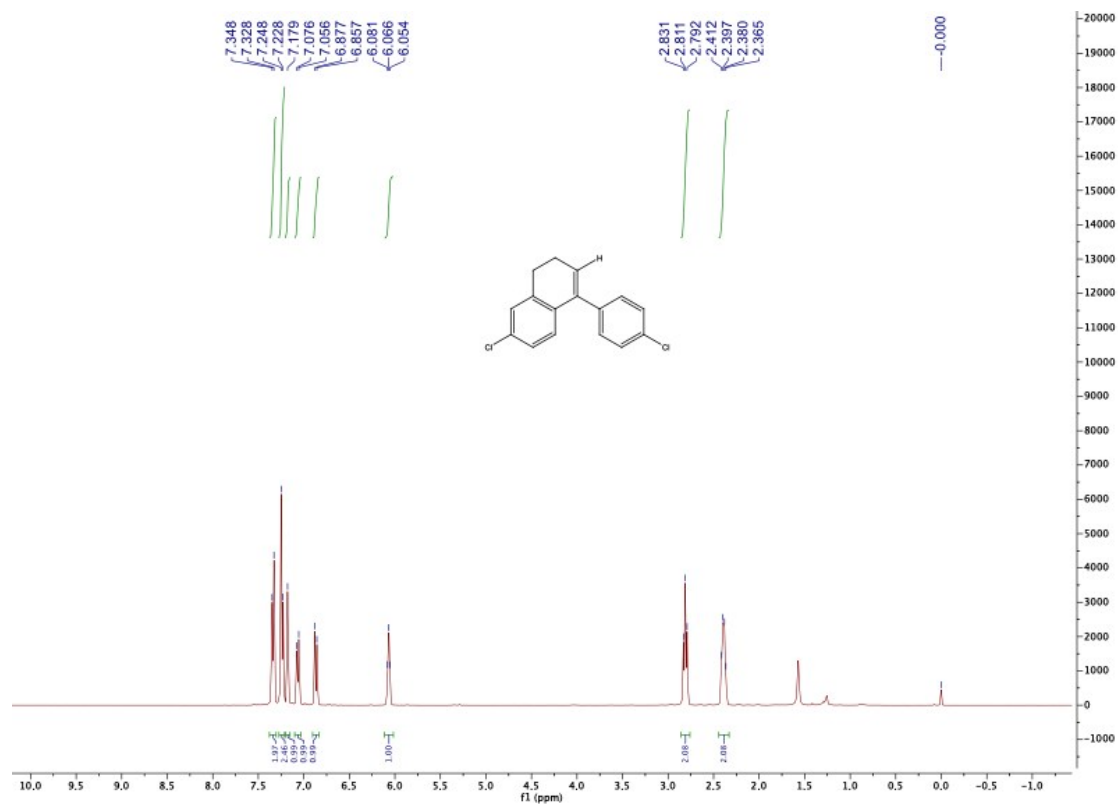

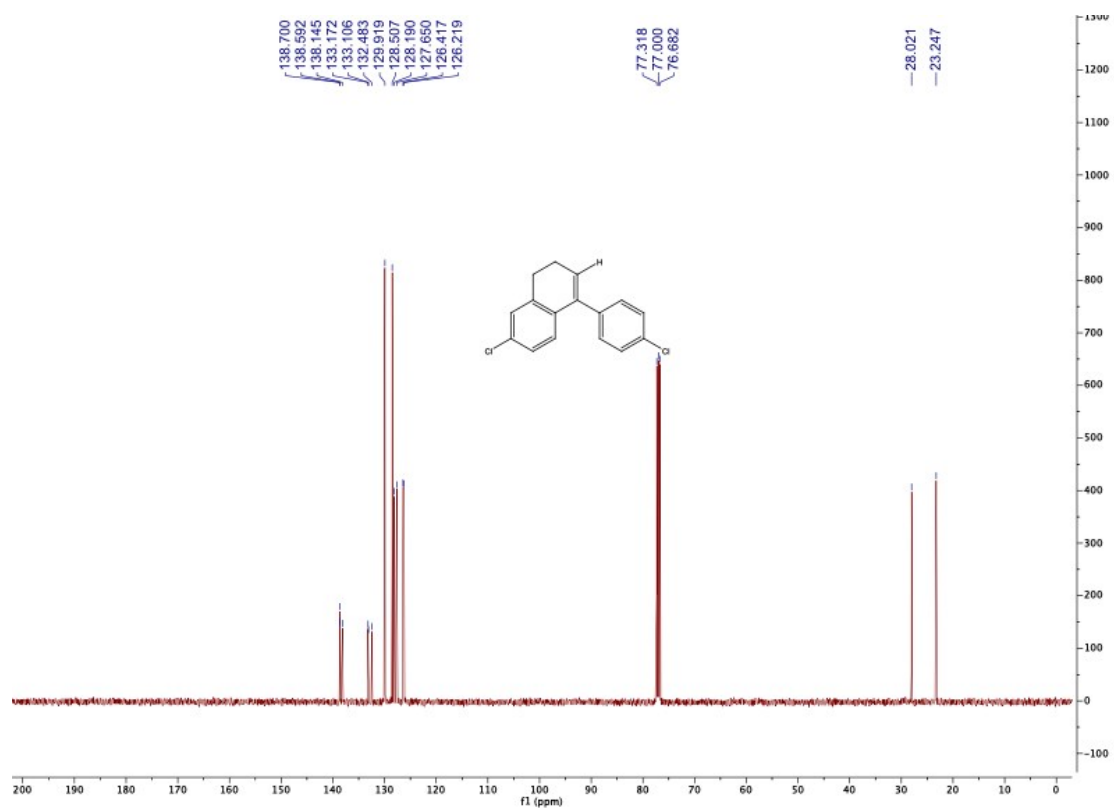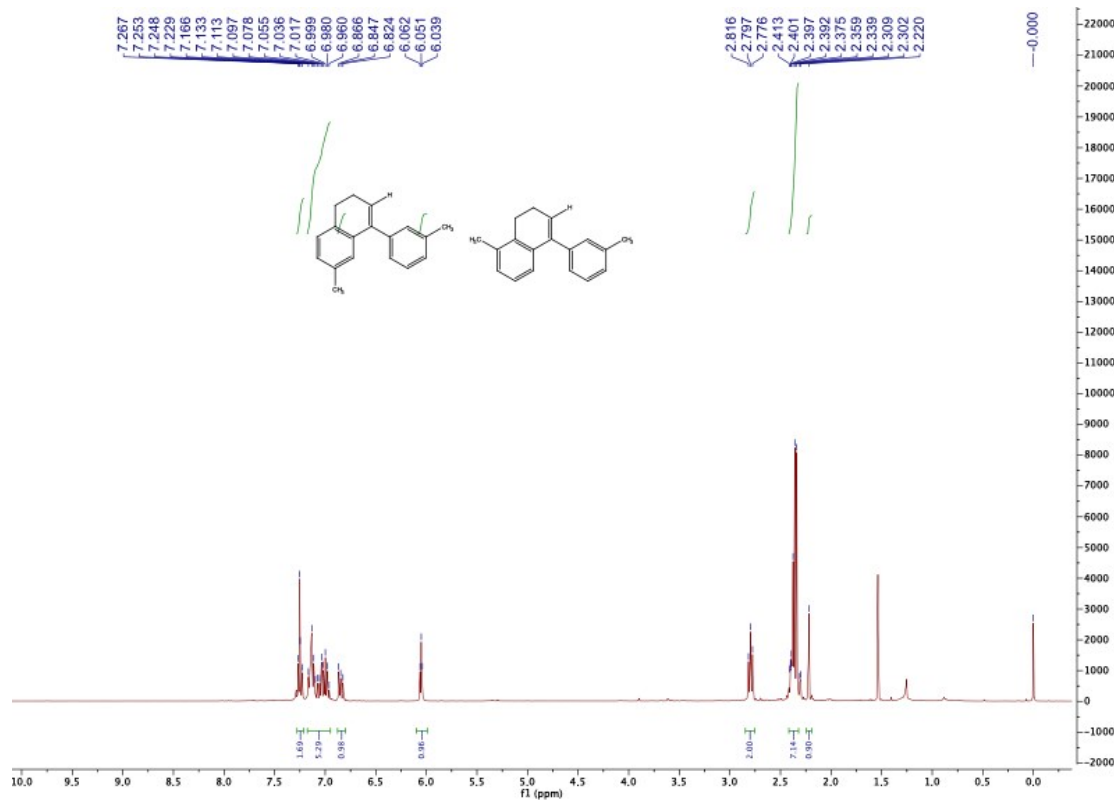

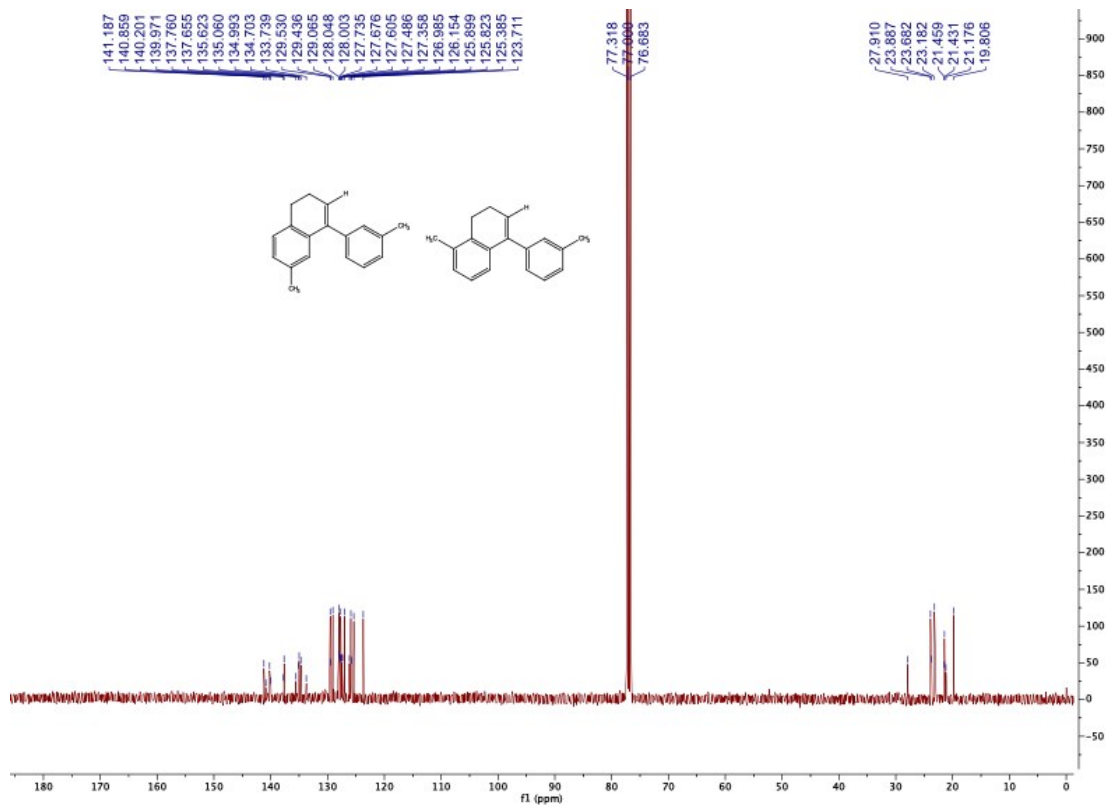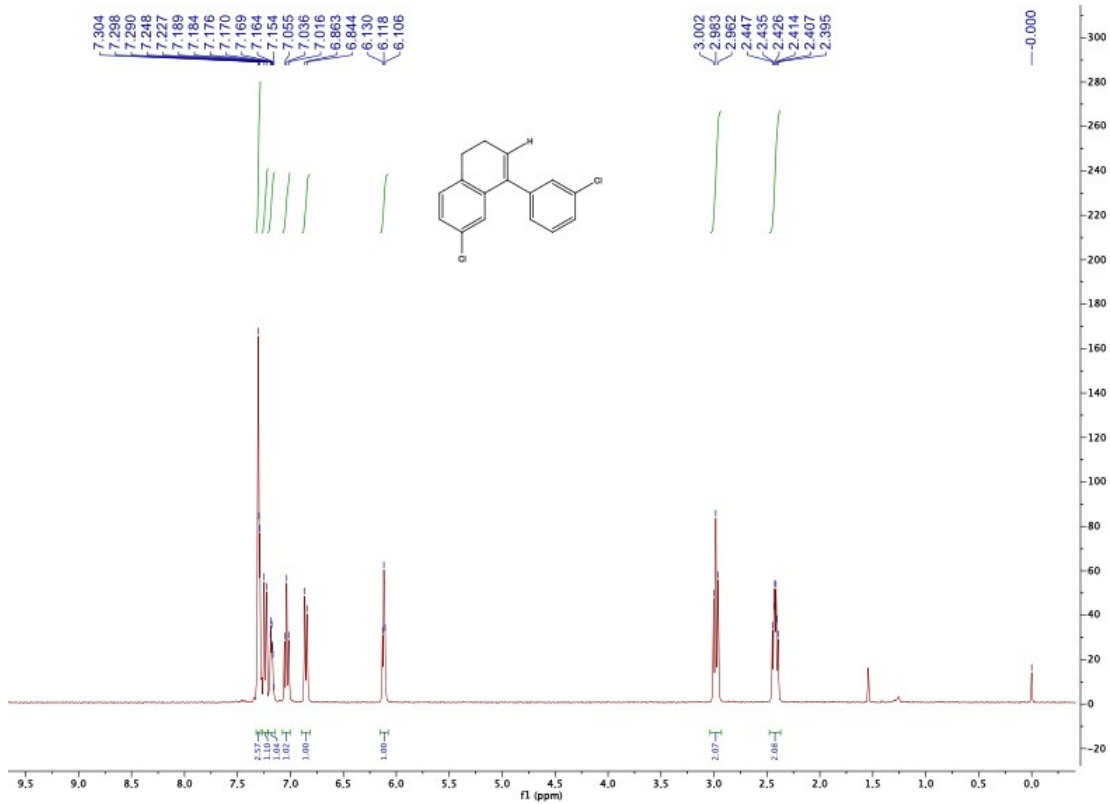

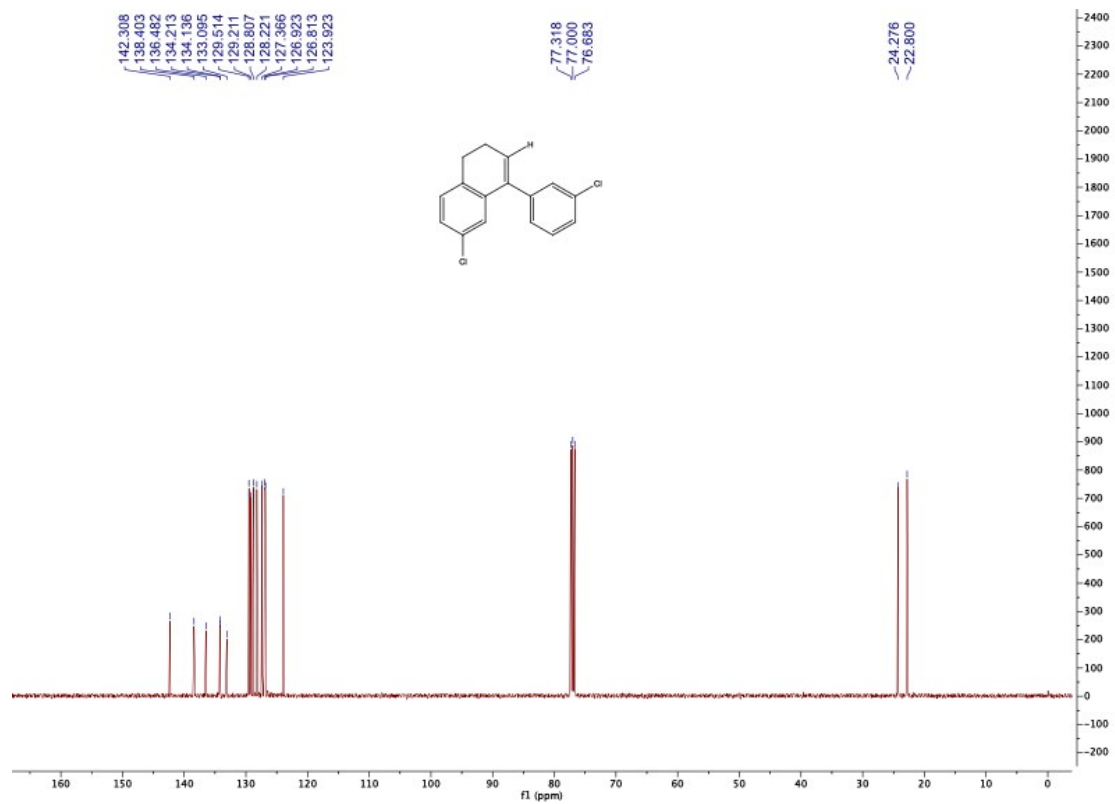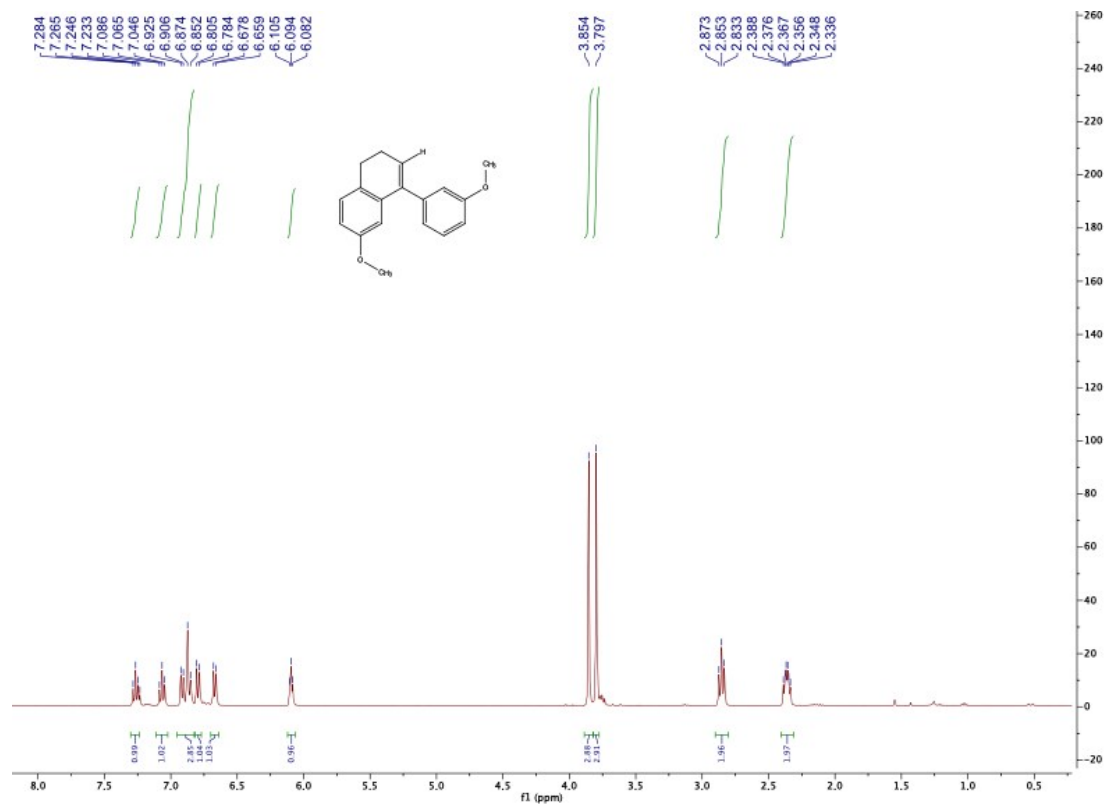

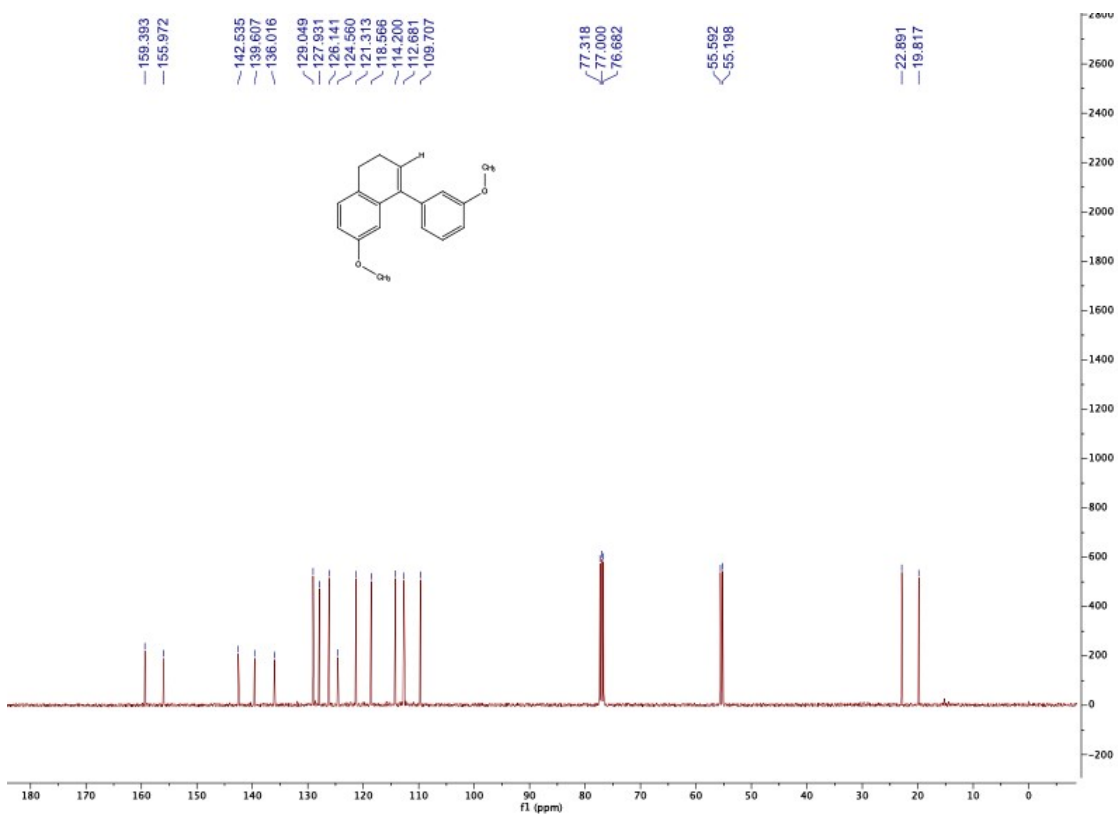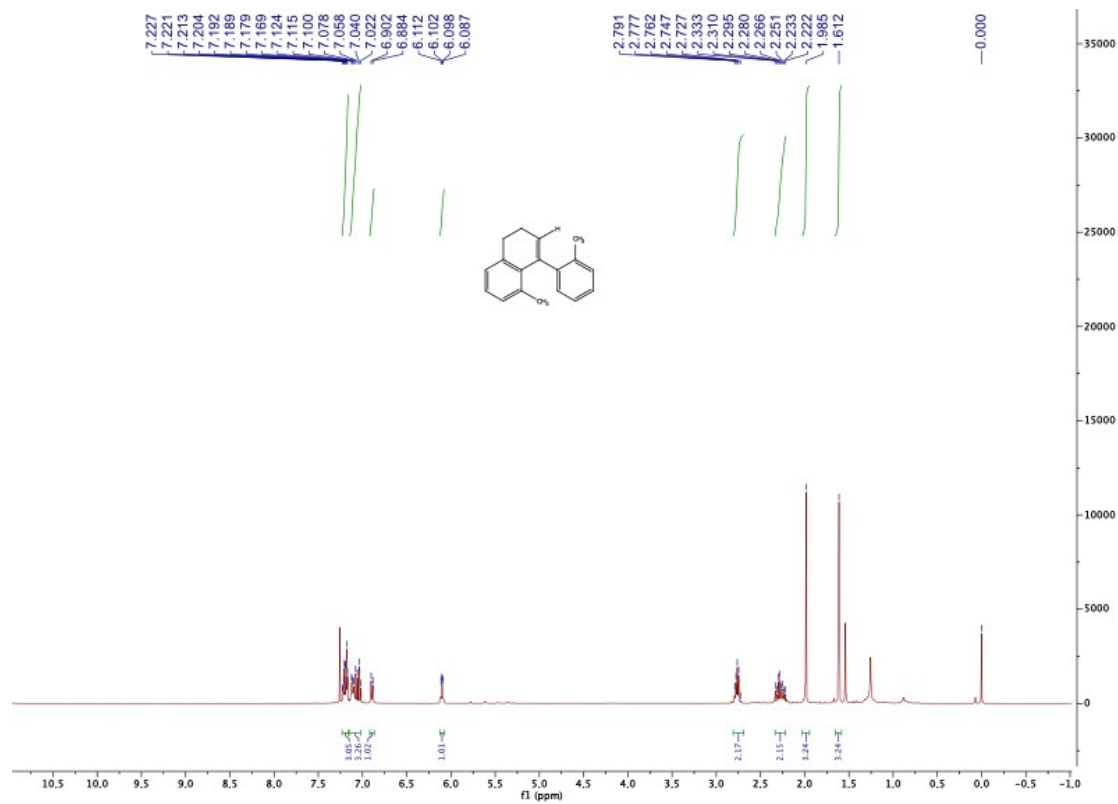

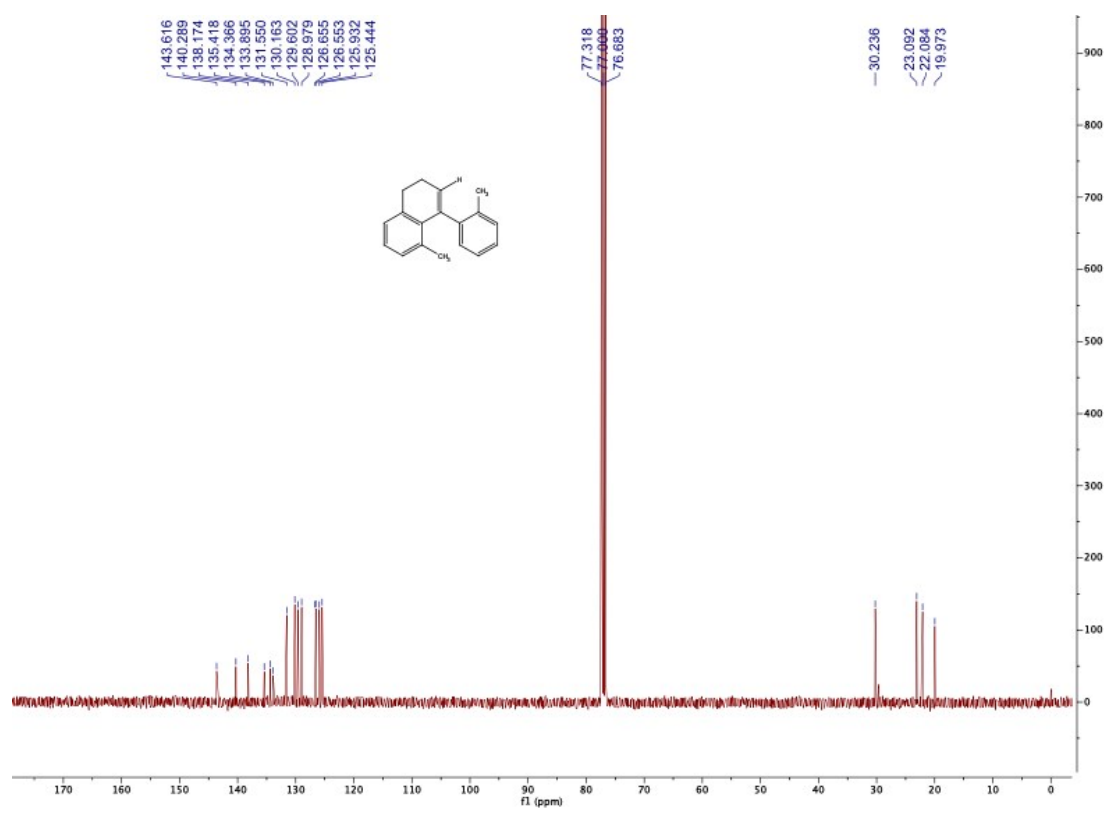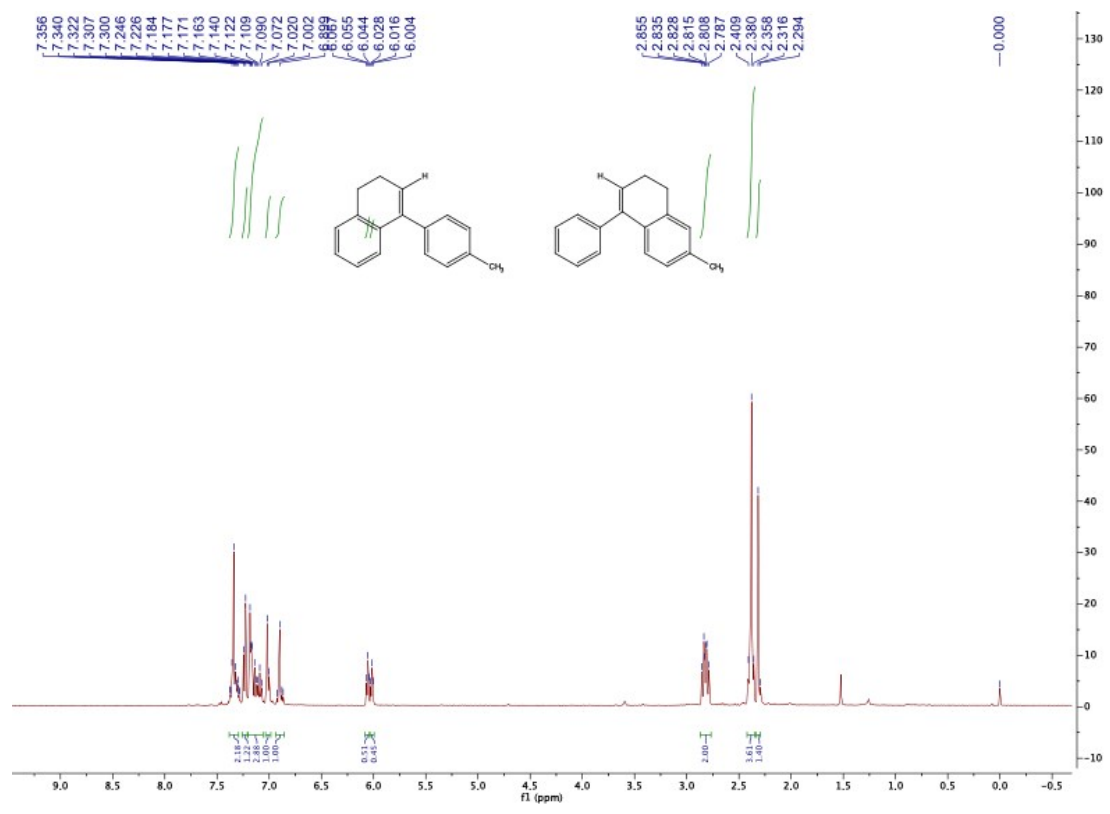



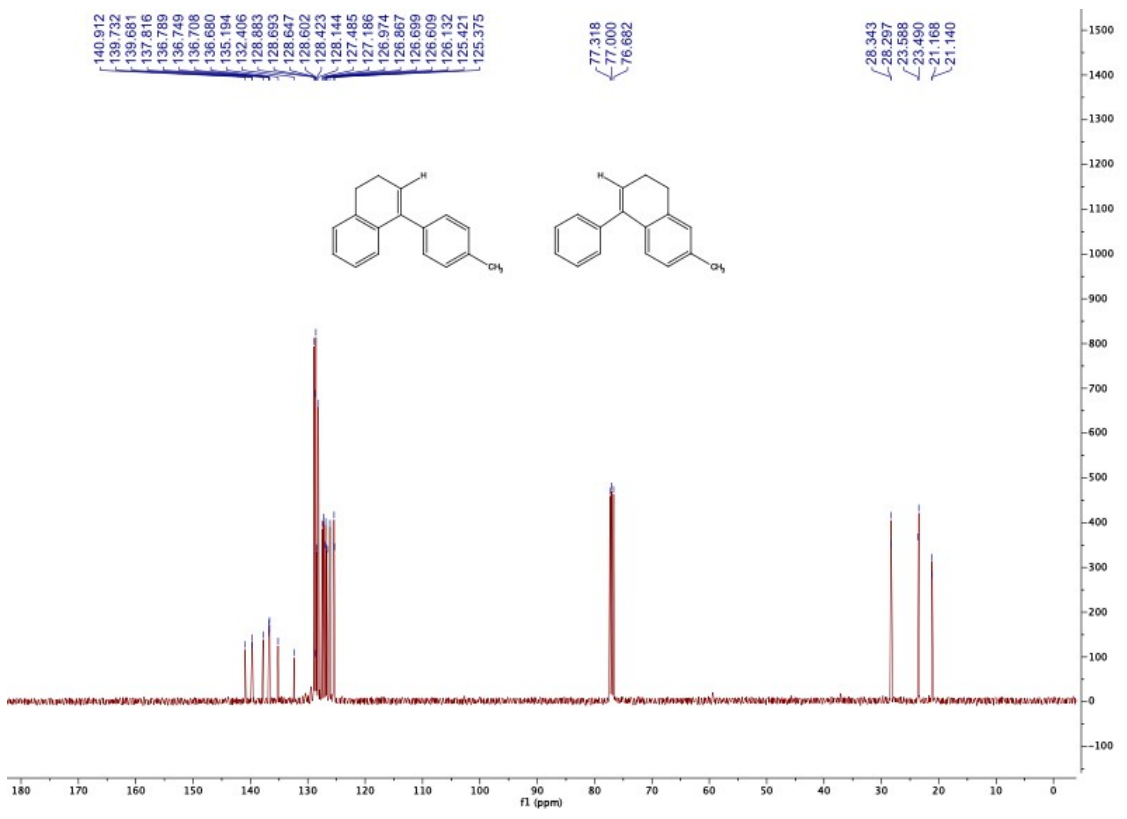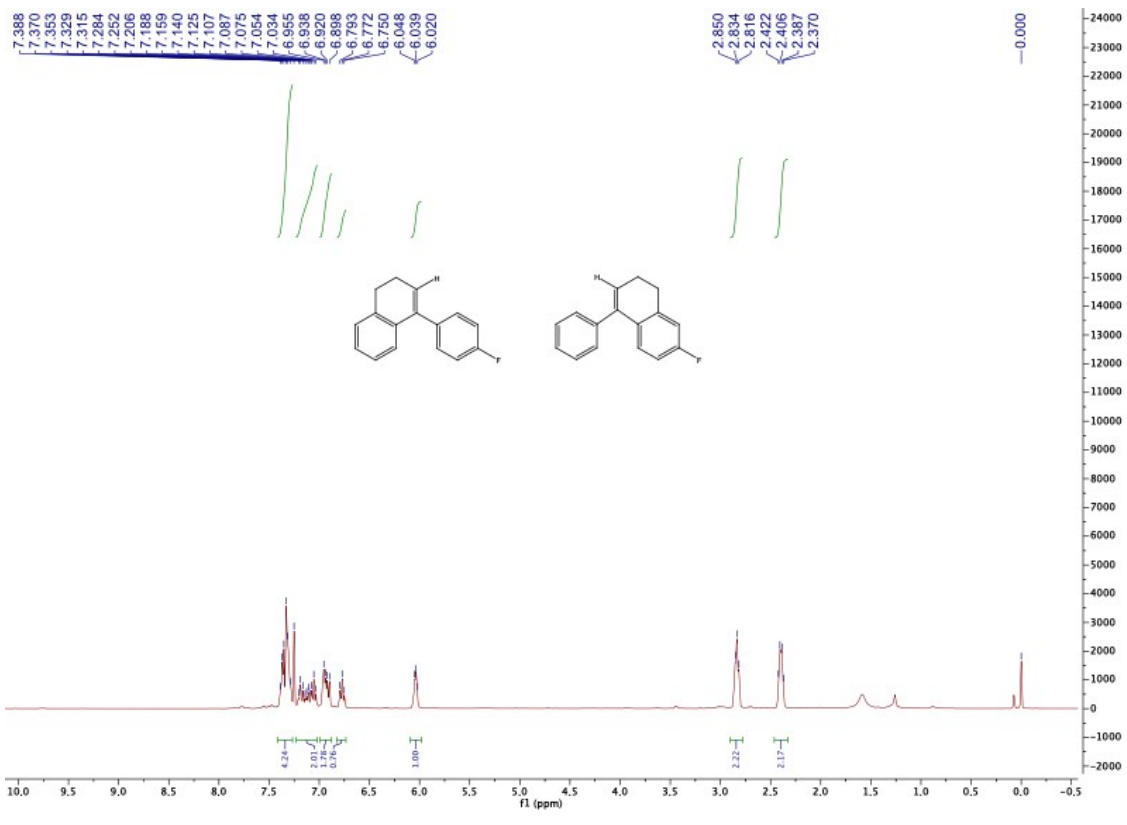

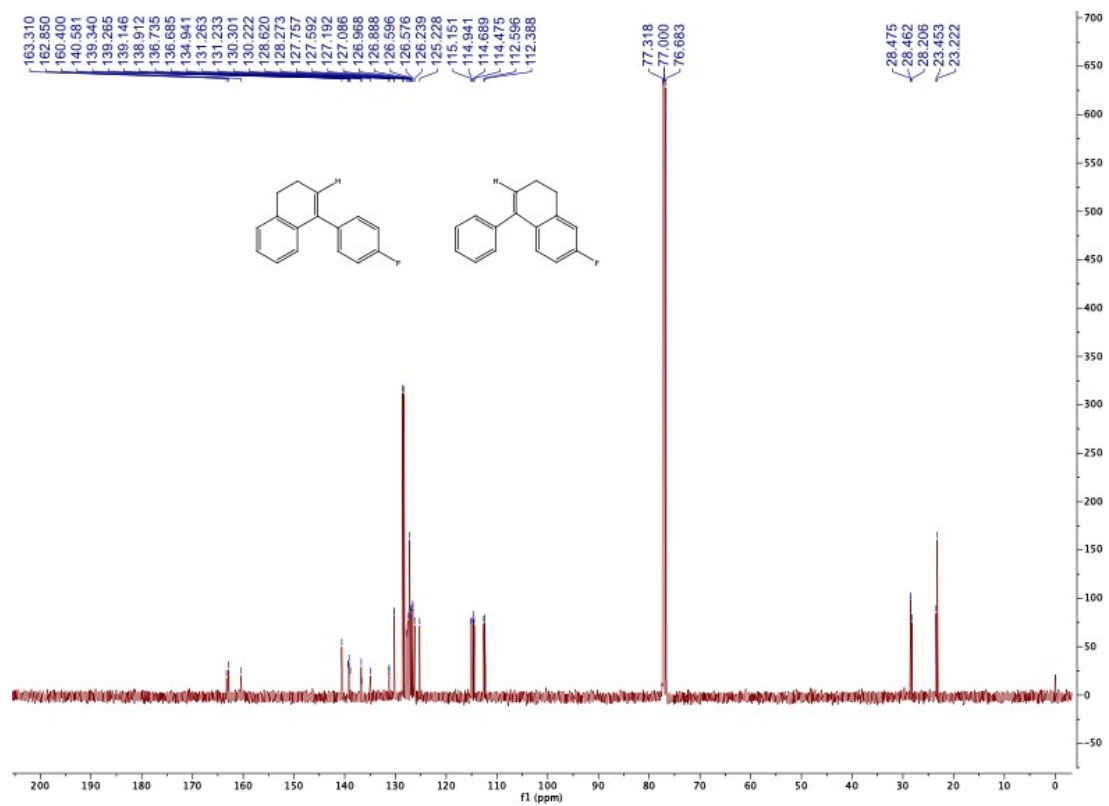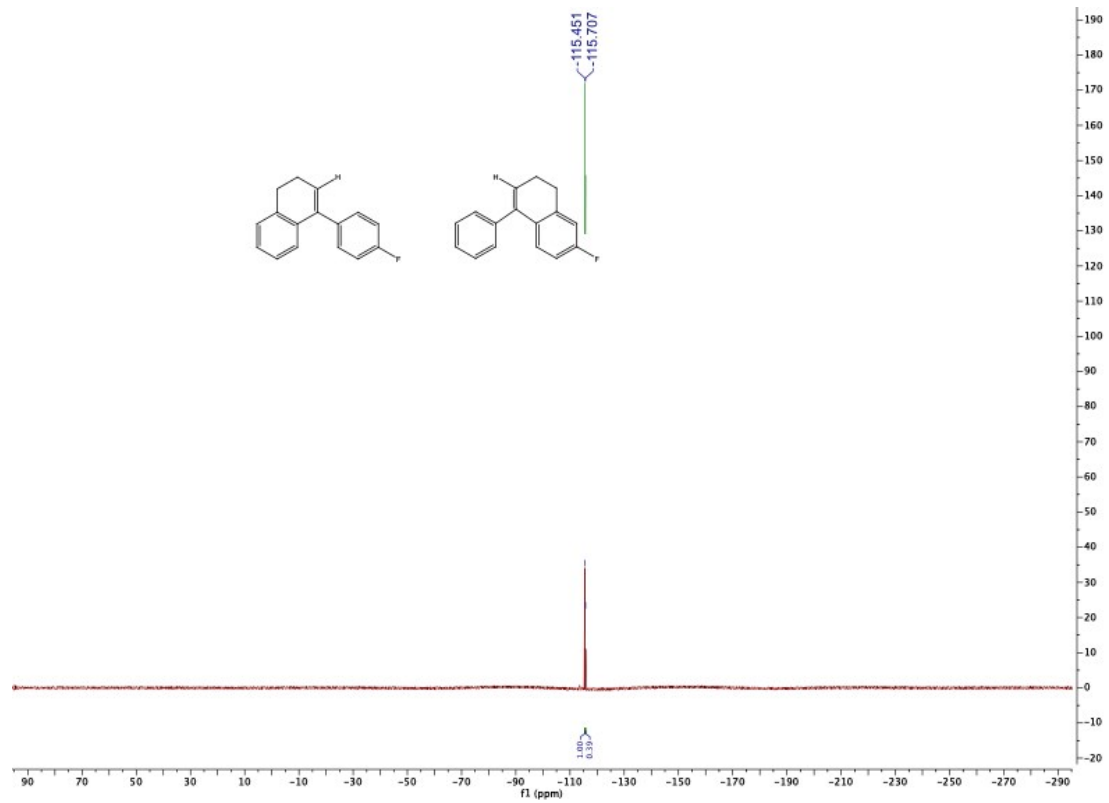

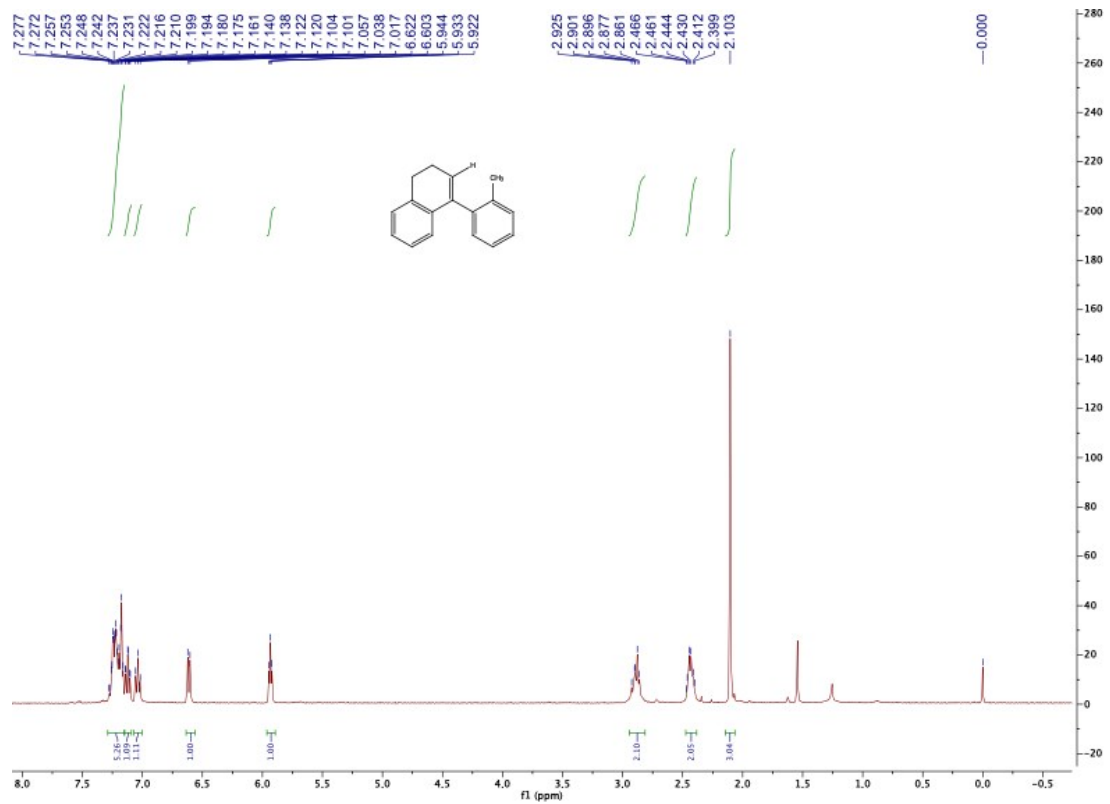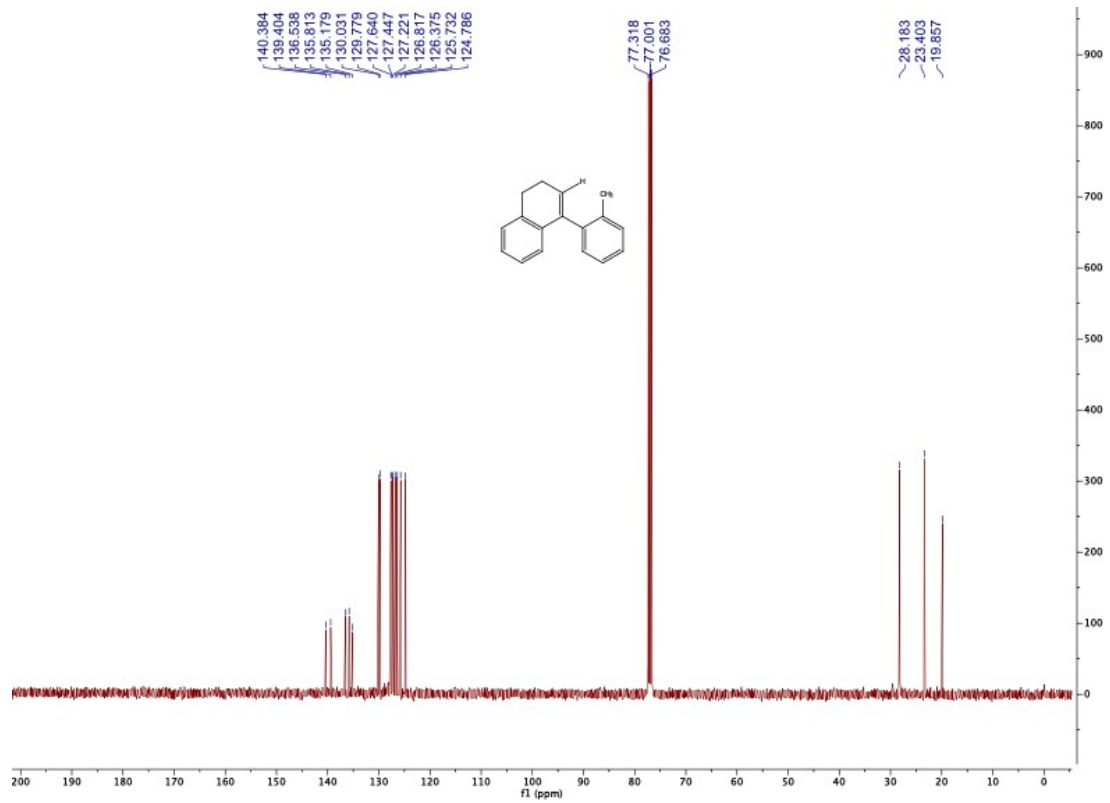

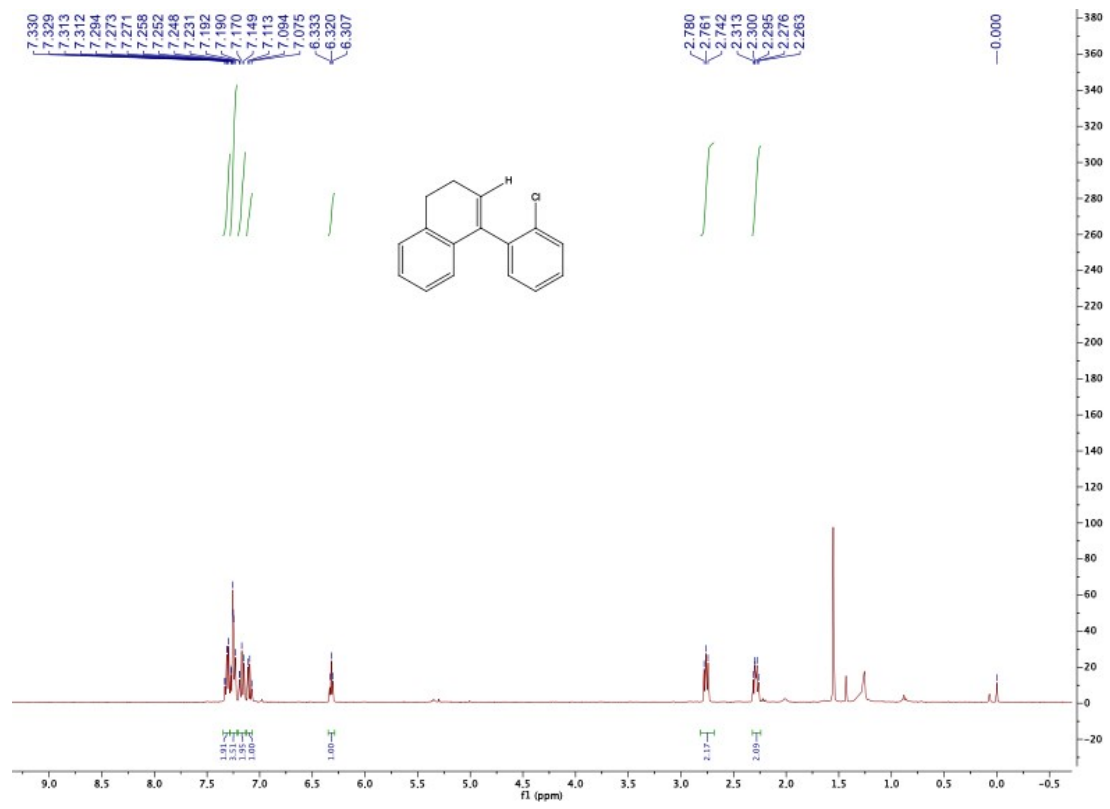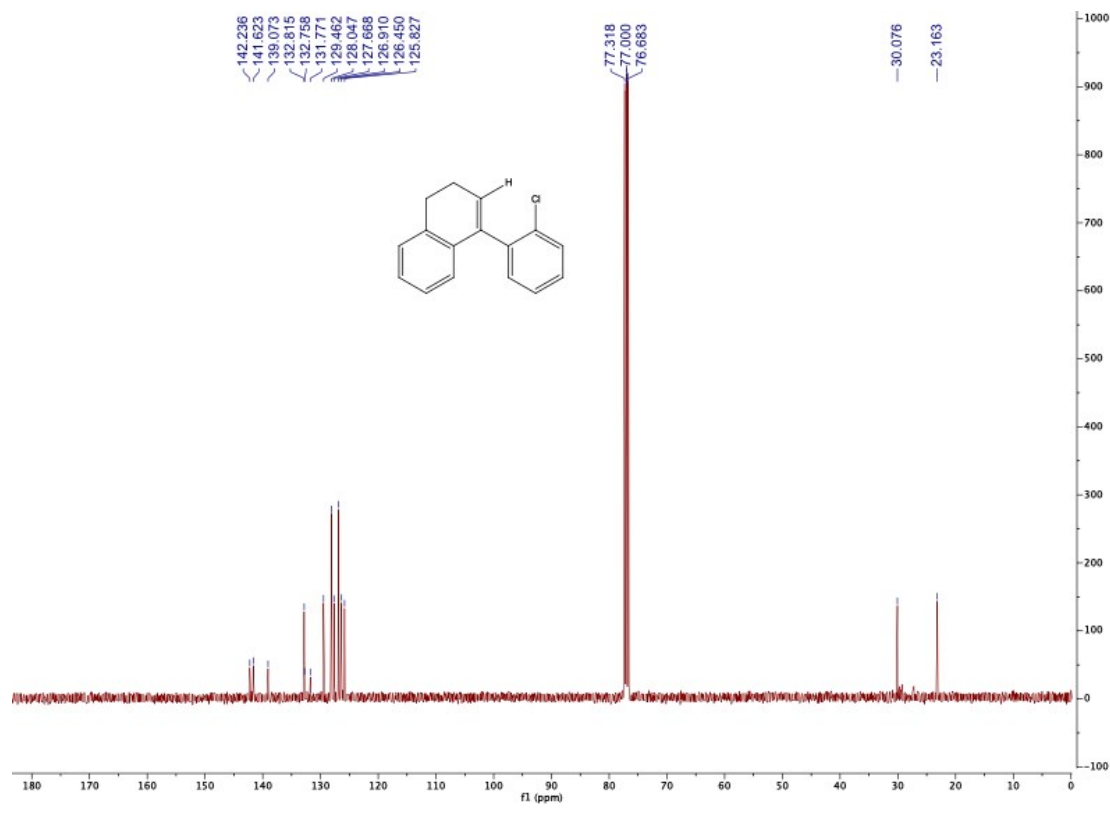

Supplement: d0qo00853b1.pdf [file d0qo00853b1.pdf]
